# Supplementary material for: Comprehensive analysis of the PD-L1 and immune infiltrates of N6-methyladenosine related long non-coding RNAs in bladder cancer
Source: Sci Rep. 2022 Jun 16;12:10082. doi: 10.1038/s41598-022-14097-x (PMC9203575; doi:10.1038/s41598-022-14097-x)
Supplement: Supplementary file 6 — Supplementary Tables. [file 41598_2022_14097_MOESM6_ESM.xlsx]

## Sheet: S2
Table S2:prognostic LncRNAs
gene	HR	HR.95L	HR.95H	pvalue
ATP1B3-AS1	1.20311	1.08419	1.33506	0.000497014
AL136295.2	0.467583	0.311334	0.702249	0.000248947
BDNF-AS	0.404032	0.220007	0.741985	0.00347523
AC020911.1	0.196342	0.0660831	0.583359	0.00338949
AC025280.1	1.97573	1.28501	3.03772	0.00191876
AC073575.4	0.551476	0.371992	0.817562	0.00304982
LINC02604	0.901715	0.846129	0.960954	0.00143833
AC022150.2	0.862646	0.77882	0.955495	0.00461356
AC074117.1	0.828342	0.728238	0.942205	0.00415835
AC073534.2	0.570652	0.410005	0.794244	0.000882152
EHMT2-AS1	0.276843	0.136897	0.55985	0.000350965
PTOV1-AS2	0.880949	0.821905	0.944234	0.000342187
AL138921.1	0.180626	0.0599653	0.54408	0.00235134
AL022322.1	0.820295	0.725512	0.927459	0.00156669
Z84485.1	0.48066	0.290752	0.794608	0.00428532
AC004076.2	0.26738	0.110512	0.646917	0.00343231
AC104564.3	0.594197	0.436325	0.80919	0.000954272
TMEM147-AS1	0.866506	0.788809	0.951857	0.00279583
AC012615.6	0.561213	0.379013	0.831001	0.00392268
AC104532.2	0.616097	0.4578	0.829131	0.00139052
AC005306.1	0.42661	0.238637	0.762648	0.00405131
AC116914.2	0.692493	0.576005	0.832538	9.21839e-05
AL022328.2	0.825236	0.727956	0.935515	0.00268585
AC004148.1	0.828968	0.745366	0.921948	0.000543648
AC132872.3	0.775597	0.655717	0.917393	0.00301299
AC012568.1	1.24624	1.07398	1.44612	0.00372694
AC097359.2	1.79696	1.195	2.70214	0.00486464
ZNF32-AS2	0.689698	0.534511	0.889942	0.00428331
SNHG20	0.818978	0.717444	0.93488	0.00310587
KCNQ1OT1	2.17343	1.40696	3.35743	0.000467347

## Sheet: S3
Table S3: Cluster text
TCGA-ZF-A9R7	1
TCGA-FD-A3SO	2
TCGA-E7-A97P	2
TCGA-GU-A767	2
TCGA-4Z-AA81	2
TCGA-E7-A85H	1
TCGA-G2-AA3C	2
TCGA-E7-A8O8	1
TCGA-XF-A9SM	2
TCGA-DK-A3IN	2
TCGA-2F-A9KR	1
TCGA-E5-A4U1	1
TCGA-E7-A3Y1	1
TCGA-FD-A6TC	2
TCGA-FD-A5BV	1
TCGA-DK-A2I4	2
TCGA-UY-A78M	2
TCGA-4Z-AA7R	1
TCGA-HQ-A5NE	2
TCGA-XF-AAMT	2
TCGA-XF-A9SU	2
TCGA-CF-A47S	2
TCGA-FD-A6TK	2
TCGA-E7-A5KF	2
TCGA-UY-A78L	2
TCGA-S5-A6DX	2
TCGA-XF-A8HI	1
TCGA-XF-A9T5	2
TCGA-XF-A9SX	2
TCGA-G2-A2EK	2
TCGA-ZF-A9RE	2
TCGA-E7-A7DV	2
TCGA-XF-AAN1	1
TCGA-DK-AA6P	1
TCGA-CF-A47Y	1
TCGA-CF-A3MI	2
TCGA-G2-A2EL	1
TCGA-XF-AAMZ	2
TCGA-DK-AA6L	1
TCGA-XF-A9T4	2
TCGA-K4-A6MB	2
TCGA-UY-A8OB	2
TCGA-DK-A1A5	2
TCGA-2F-A9KQ	2
TCGA-SY-A9G0	2
TCGA-GV-A40G	1
TCGA-FD-A5BX	2
TCGA-BL-A13J	2
TCGA-ZF-AA54	2
TCGA-GU-A766	2
TCGA-LT-A8JT	1
TCGA-FJ-A3Z9	1
TCGA-DK-A1AC	2
TCGA-C4-A0F1	2
TCGA-G2-A2ES	2
TCGA-XF-AAN4	2
TCGA-4Z-AA83	1
TCGA-4Z-AA7N	2
TCGA-HQ-A2OE	2
TCGA-UY-A8OC	2
TCGA-GV-A3JV	2
TCGA-XF-A9T8	2
TCGA-KQ-A41S	2
TCGA-CU-A3YL	1
TCGA-E7-A7XN	2
TCGA-DK-A2HX	2
TCGA-CF-A8HY	2
TCGA-4Z-AA7W	2
TCGA-FD-A43U	2
TCGA-BL-A0C8	1
TCGA-BT-A0S7	2
TCGA-ZF-A9R3	1
TCGA-4Z-AA89	1
TCGA-GU-A42P	1
TCGA-FD-A3NA	2
TCGA-E7-A5KE	1
TCGA-ZF-AA4V	2
TCGA-ZF-AA53	2
TCGA-ZF-A9RM	1
TCGA-BL-A13I	2
TCGA-CU-A72E	2
TCGA-CF-A47W	2
TCGA-GC-A3I6	2
TCGA-FD-A6TA	2
TCGA-CF-A47X	1
TCGA-ZF-AA51	2
TCGA-FD-A62O	1
TCGA-BL-A3JM	1
TCGA-FJ-A3ZF	1
TCGA-CU-A0YO	2
TCGA-CF-A5UA	2
TCGA-K4-AAQO	2
TCGA-FD-A3SM	2
TCGA-BL-A5ZZ	2
TCGA-FD-A62N	2
TCGA-BT-A20J	2
TCGA-FT-A61P	2
TCGA-DK-AA77	2
TCGA-ZF-AA5N	2
TCGA-DK-AA6U	1
TCGA-BT-A20O	2
TCGA-GD-A3OS	1
TCGA-XF-A9SZ	2
TCGA-4Z-AA82	2
TCGA-DK-AA76	1
TCGA-DK-A3IL	1
TCGA-E7-A678	2
TCGA-ZF-A9R1	2
TCGA-XF-A9SH	1
TCGA-FD-A5BU	2
TCGA-C4-A0F7	2
TCGA-C4-A0F0	2
TCGA-FD-A3N5	2
TCGA-ZF-A9R5	1
TCGA-CU-A3KJ	2
TCGA-DK-AA6S	2
TCGA-BT-A42E	2
TCGA-FD-A43X	1
TCGA-ZF-AA4R	1
TCGA-BT-A20T	2
TCGA-E7-A7DU	1
TCGA-DK-A3WY	2
TCGA-G2-A2EF	1
TCGA-BT-A20V	2
TCGA-K4-A3WV	1
TCGA-GU-AATQ	2
TCGA-CF-A3MF	1
TCGA-CF-A47T	2
TCGA-YC-A8S6	2
TCGA-DK-A3IS	2
TCGA-XF-A9SJ	2
TCGA-DK-AA6T	1
TCGA-BT-A20N	2
TCGA-XF-AAMW	2
TCGA-BT-A3PJ	2
TCGA-GC-A3OO	2
TCGA-E7-A6ME	2
TCGA-XF-AAN5	2
TCGA-FD-A3SN	2
TCGA-ZF-A9R2	2
TCGA-ZF-AA4T	1
TCGA-E7-A4IJ	1
TCGA-FD-A6TE	2
TCGA-H4-A2HO	2
TCGA-FD-A6TB	2
TCGA-XF-AAN3	2
TCGA-XF-AAMH	2
TCGA-FD-A3B8	2
TCGA-XF-A9SY	2
TCGA-CU-A0YN	2
TCGA-FD-A5BZ	2
TCGA-BT-A20P	1
TCGA-XF-A8HD	2
TCGA-GV-A3JX	2
TCGA-H4-A2HQ	1
TCGA-XF-A9SP	2
TCGA-DK-A3IK	1
TCGA-C4-A0F6	2
TCGA-CF-A7I0	1
TCGA-FD-A3B6	2
TCGA-GU-A764	2
TCGA-GU-A42R	1
TCGA-DK-A6B6	1
TCGA-R3-A69X	2
TCGA-5N-A9KM	2
TCGA-FD-A6TD	2
TCGA-4Z-AA7M	1
TCGA-ZF-AA56	2
TCGA-XF-A8HH	1
TCGA-C4-A0EZ	1
TCGA-XF-AAML	2
TCGA-ZF-AA58	2
TCGA-UY-A9PA	2
TCGA-G2-AA3F	1
TCGA-FJ-A871	2
TCGA-ZF-A9RN	2
TCGA-GC-A3RB	2
TCGA-UY-A9PF	2
TCGA-YC-A89H	2
TCGA-XF-AAMQ	2
TCGA-FD-A3B4	2
TCGA-DK-A1AB	2
TCGA-BT-A20X	2
TCGA-GV-A3JW	1
TCGA-UY-A8OD	1
TCGA-2F-A9KT	1
TCGA-ZF-AA5H	2
TCGA-XF-A9T2	2
TCGA-DK-A3WX	2
TCGA-YF-AA3L	2
TCGA-BT-A2LA	1
TCGA-4Z-AA87	1
TCGA-BT-A2LB	2
TCGA-XF-A8HB	2
TCGA-DK-A2I6	2
TCGA-ZF-AA4X	1
TCGA-E7-A7PW	1
TCGA-4Z-AA7S	1
TCGA-CF-A3MH	2
TCGA-DK-A6B2	2
TCGA-4Z-AA86	2
TCGA-5N-A9KI	2
TCGA-XF-A9SL	2
TCGA-XF-AAN2	2
TCGA-CF-A9FL	2
TCGA-CF-A9FM	1
TCGA-ZF-A9RD	2
TCGA-G2-AA3D	1
TCGA-DK-A2I2	2
TCGA-FD-A62S	2
TCGA-MV-A51V	2
TCGA-E5-A2PC	2
TCGA-DK-A3X2	2
TCGA-GD-A76B	1
TCGA-GC-A6I1	2
TCGA-XF-A9SK	1
TCGA-DK-A1AD	2
TCGA-K4-A5RI	2
TCGA-FD-A3SQ	2
TCGA-GV-A3QF	1
TCGA-G2-A3VY	1
TCGA-XF-AAN8	2
TCGA-CU-A3QU	2
TCGA-DK-A6AW	2
TCGA-GC-A3BM	2
TCGA-GV-A6ZA	1
TCGA-G2-A2EJ	2
TCGA-FD-A43N	1
TCGA-XF-AAMJ	2
TCGA-GU-A763	2
TCGA-G2-A2EC	2
TCGA-FD-A3B7	2
TCGA-FD-A5C0	2
TCGA-FD-A5BS	2
TCGA-BT-A20W	1
TCGA-UY-A78O	2
TCGA-FD-A3B5	2
TCGA-BT-A42C	1
TCGA-CF-A8HX	1
TCGA-PQ-A6FI	2
TCGA-FJ-A3Z7	1
TCGA-XF-A8HC	1
TCGA-ZF-AA4W	2
TCGA-LC-A66R	2
TCGA-E7-A8O7	1
TCGA-UY-A9PB	2
TCGA-FD-A6TI	2
TCGA-G2-AA3B	1
TCGA-K4-A54R	2
TCGA-DK-A1AA	2
TCGA-CU-A5W6	2
TCGA-DK-AA6R	2
TCGA-BT-A3PH	2
TCGA-G2-A3IB	2
TCGA-2F-A9KP	1
TCGA-DK-A3IT	2
TCGA-FD-A43P	1
TCGA-DK-A3IV	1
TCGA-2F-A9KW	2
TCGA-GU-A762	2
TCGA-XF-AAME	2
TCGA-XF-AAN0	1
TCGA-FD-A62P	2
TCGA-CF-A47V	1
TCGA-XF-A9SI	2
TCGA-GU-A42Q	2
TCGA-BT-A42F	2
TCGA-ZF-A9RF	2
TCGA-KQ-A41N	1
TCGA-GD-A3OQ	2
TCGA-BT-A20U	2
TCGA-XF-A9SW	2
TCGA-FD-A3B3	2
TCGA-ZF-A9RC	1
TCGA-E7-A6MD	2
TCGA-E5-A4TZ	1
TCGA-ZF-A9R4	1
TCGA-GV-A3QH	1
TCGA-BT-A0YX	2
TCGA-FT-A3EE	2
TCGA-ZF-A9RL	1
TCGA-ZF-A9R9	1
TCGA-DK-A1A7	2
TCGA-FD-A3SR	2
TCGA-GU-AATP	1
TCGA-DK-AA6X	1
TCGA-XF-A9T3	2
TCGA-PQ-A6FN	2
TCGA-CF-A1HR	2
TCGA-E7-A3X6	2
TCGA-DK-A3WW	2
TCGA-XF-AAMY	1
TCGA-K4-A3WS	1
TCGA-GC-A3YS	1
TCGA-DK-A1AF	2
TCGA-LT-A5Z6	1
TCGA-GC-A4ZW	2
TCGA-K4-A4AB	2
TCGA-DK-AA74	2
TCGA-G2-A2EO	2
TCGA-DK-A1AG	1
TCGA-GV-A3JZ	2
TCGA-XF-A9SV	2
TCGA-UY-A78K	2
TCGA-FD-A6TH	2
TCGA-DK-AA6W	1
TCGA-CF-A3MG	2
TCGA-DK-A3X1	1
TCGA-DK-A1A6	2
TCGA-XF-AAMG	1
TCGA-E7-A541	1
TCGA-XF-A8HE	2
TCGA-DK-AA6Q	2
TCGA-UY-A78N	1
TCGA-DK-AA75	1
TCGA-ZF-AA5P	2
TCGA-GC-A3WC	1
TCGA-K4-A4AC	2
TCGA-FD-A3SL	2
TCGA-K4-A5RH	2
TCGA-FD-A5C1	2
TCGA-XF-AAN7	2
TCGA-2F-A9KO	1
TCGA-DK-A3IM	2
TCGA-FD-A3SS	2
TCGA-UY-A9PE	1
TCGA-GV-A40E	2
TCGA-BT-A2LD	2
TCGA-UY-A9PD	1
TCGA-DK-A3IQ	2
TCGA-E7-A4XJ	1
TCGA-XF-A9T6	2
TCGA-FD-A43Y	2
TCGA-S5-AA26	1
TCGA-YC-A9TC	2
TCGA-K4-A6FZ	2
TCGA-KQ-A41R	1
TCGA-DK-AA6M	2
TCGA-ZF-AA52	2
TCGA-K4-A5RJ	2
TCGA-HQ-A5ND	2
TCGA-BT-A3PK	2
TCGA-FD-A3N6	2
TCGA-UY-A78P	2
TCGA-BT-A20Q	2
TCGA-CU-A0YR	2
TCGA-SY-A9G5	2
TCGA-4Z-AA84	2
TCGA-4Z-AA7Q	2
TCGA-FD-A5BT	2
TCGA-CF-A27C	1
TCGA-E7-A6MF	2
TCGA-FD-A6TF	2
TCGA-XF-AAMR	2
TCGA-XF-A8HF	2
TCGA-ZF-AA4U	2
TCGA-E7-A97Q	1
TCGA-ZF-A9R0	1
TCGA-FD-A43S	2
TCGA-XF-A8HG	1
TCGA-K4-A83P	2
TCGA-GD-A2C5	2
TCGA-XF-AAMX	1
TCGA-DK-A1AE	2
TCGA-FJ-A3ZE	1
TCGA-DK-A2I1	2
TCGA-DK-A6B0	2
TCGA-FD-A5BR	1
TCGA-GD-A3OP	2
TCGA-KQ-A41P	1
TCGA-UY-A9PH	2
TCGA-FD-A5BY	2
TCGA-K4-A3WU	1
TCGA-FD-A3SJ	1
TCGA-E7-A519	2
TCGA-DK-A3IU	2
TCGA-XF-A9T0	1
TCGA-YF-AA3M	2
TCGA-4Z-AA7Y	2
TCGA-KQ-A41Q	1
TCGA-FD-A3SP	2
TCGA-GC-A6I3	1
TCGA-4Z-AA80	2
TCGA-G2-A3IE	1
TCGA-CF-A9FF	1
TCGA-XF-A9ST	2
TCGA-DK-A6B5	1
TCGA-GC-A3RC	2
TCGA-GV-A3QK	1
TCGA-DK-AA71	2
TCGA-KQ-A41O	1
TCGA-E7-A677	1
TCGA-DK-A6B1	1
TCGA-CF-A5U8	1
TCGA-GU-AATO	2
TCGA-FD-A6TG	2
TCGA-4Z-AA7O	2
TCGA-GV-A3QI	1
TCGA-DK-A6AV	1
TCGA-DK-A1A3	2
TCGA-GD-A6C6	2
TCGA-GC-A3RD	2
TCGA-BT-A20R	2

## Sheet: S4
Table S4: Immune cell infiltration
Mixture	B cells naive	B cells memory	Plasma cells	T cells CD8	T cells CD4 naive	T cells CD4 memory resting	T cells CD4 memory activated	T cells follicular helper	T cells regulatory (Tregs)	T cells gamma delta	NK cells resting	NK cells activated	Monocytes	Macrophages M0	Macrophages M1	Macrophages M2	Dendritic cells resting	Dendritic cells activated	Mast cells resting	Mast cells activated	Eosinophils	Neutrophils	P-value	Correlation	RMSE
TCGA-K4-A3WV-11A-21R-A22U-07	0	0.0157897	0.0120294	0.129797	0	0.341683	0	0.0380596	0	0	0	0.0896498	0.0235752	0.0174981	0.0302158	0.107057	0	0.0066153	0.188029	0	0	0	0.27	0.0469589	1.08432
TCGA-BT-A2LA-11A-11R-A18C-07	0	0.000442569	0	0.300885	0	0.239545	0.0333579	0.0111033	0	0.0600804	0	0	0.00707054	0	0.0100595	0.140597	0.0425287	0.0248837	0	0.118024	0.0114231	0	0.139	0.086697	1.07797
TCGA-BT-A20N-11A-11R-A14Y-07	0.222786	0	0	0.00798788	0	0.130389	0	0.0273705	0	0.00142994	0	0	0.0834684	0	0.024616	0.220705	0.0359627	0.0071732	0.167706	0	0	0.0704043	0.046	0.15885	1.01717
TCGA-GC-A6I3-11A-11R-A31N-07	0.104213	0.0651916	0.138697	0.146964	0	0.0581473	0.0879175	0.112871	0.0467481	0	0.0382775	0	0.00406628	0.0446655	0.00234052	0.0563477	0	0.060817	0.0139518	0.00726546	0	0.0115194	0.002	0.404623	0.916447
TCGA-GD-A3OP-11A-11R-A220-07	0.016789	0	0.0052977	0.15152	0	0.206193	0.0429133	0.00179168	0	0.0160351	0	0	0.0308513	0	0.210887	0.101509	0.111096	0.0368856	0.0682318	0	0	0	0.096	0.110741	1.06041
TCGA-BT-A2LB-11A-11R-A18C-07	0.183315	0	0.0102489	0.18752	0	0.155605	0.0702509	0.029564	0.00730294	0	0	0.00620738	0.00809262	0	0.0316713	0.155778	0	0.0671717	0.0182844	0.0317773	0.0149021	0.0223079	0.05	0.156106	1.02262
TCGA-GC-A3BM-11A-11R-A22U-07	0.048865	0	0.00489502	0.350883	0	0.0257511	0	0.0270092	0.00120476	0	0	0.0267426	0.0276711	0	0.00318722	0.0313488	0	0.00714477	0	0.414412	0.0304441	0.000441011	0.277	0.0466357	1.14798
TCGA-CU-A0YR-11A-13R-A10U-07	0.233818	0	0.0715747	0.154961	0	0.119379	0	0.079509	0.0171058	0	0	0.0841919	0	0.0113099	0.0305441	0.0782392	0	0	0.116567	0.00280019	0	0	0.002	0.408	0.915475
TCGA-K4-A54R-11A-11R-A26T-07	0.000622259	0	0.00320557	0.294396	0	0.180963	0.117817	0	0	0	0.0638968	0	0.011228	0	0.00688141	0.066039	0.0256939	0.0704115	0.0375922	0.101319	0.0163325	0.00360162	0.237	0.0547227	1.08538
TCGA-BT-A20Q-11A-11R-A14Y-07	0.000375888	0.00137169	0	0.0509706	0	0.27409	0	0.00162272	0.0548577	0	0	0.0323698	0.0795312	0	0.00469199	0.164983	0.0582542	0	0.276881	0	0	0	0.101	0.106079	1.044
TCGA-GD-A2C5-11A-11R-A180-07	0.117062	0.00781223	0.0685153	0.1013	0	0.346882	0.00230619	0.0207603	0.0668735	0	0	0.0416328	0.0132311	0.0122658	0.00428389	0.029768	0.09056	0.0239793	0.0474433	0	0	0.00532476	0.059	0.149597	1.03973
TCGA-CU-A0YN-11A-11R-A10U-07	0.156354	0	0	0.0391165	0	0.201099	0	0.0117444	0.00239455	0	0.00103633	0.00903408	0.0254046	0	0.011423	0.342293	0	0	0.2001	0	0	0	0.073	0.131862	1.02894
TCGA-BT-A20R-11A-11R-A16R-07	0.035567	0	0.00555097	0.0200559	0	0.112207	0.0139019	0	0	0	0	0.0150292	0.0201123	0	0.0387531	0.181009	0.0557259	0	0.454623	0.0308044	0	0.0166603	0.012	0.26817	0.993273
TCGA-GD-A3OQ-11A-21R-A220-07	0.0593541	0	0.00374337	0.261408	0	0.213702	0	0.00129349	0.0180455	0	0	0	0.015853	0	0.0142405	0.14871	0.117128	0	0.0714043	0.0479265	0.0236444	0.00354697	0.261	0.0484464	1.06866
TCGA-K4-A5RI-11A-11R-A28M-07	0.165224	0	0.107445	0.117685	0	0.127393	0.0690118	0	0.0672675	0	0	0.0154777	0.00752478	0.0472026	0.0227061	0.102108	0	0.0329297	0.100362	0	0	0.0176628	0.001	0.420552	0.906495
TCGA-BL-A13J-11A-13R-A10U-07	0.026066	0	0	0.0150048	0	0.252877	0	0.0112909	0	0	0	0.0504047	0.0552908	0	0	0.296016	0	0.000523933	0.209514	0	0.0347434	0.0482679	0.073	0.131433	1.02844
TCGA-BT-A20U-11A-11R-A14Y-07	0.121848	0.0397784	0.0328139	0.257315	0	0.0579502	0.0759657	0.0429287	0.010631	0.0189997	0	0.0308516	0	0.00761152	0.0249141	0.0974426	0.0866237	0.00960535	0.0682163	0	0.0165052	0	0.013	0.263177	0.977438
TCGA-BT-A20W-11A-11R-A14Y-07	0.0432608	0	0	0.259553	0	0.182639	0.0422122	0.0628166	0.0387477	0.0110546	0	0.0462477	0.0206667	0	0.0540708	0.0831626	0.048024	0.0109308	0.0966133	0	0	0	0.012	0.267108	0.985178
TCGA-GC-A3WC-11A-11R-A22U-07	0.259616	0	0.0452936	0.0460983	0	0.370048	0.0437279	0.0338869	0	0	0.00599444	0	0.00561423	0.0121806	0.0177797	0.0670062	0.00752021	0.0175	0.0677337	0	0	0	0.005	0.339107	0.951778
TCGA-ZF-A9R7-01A-11R-A38B-07	0.0535978	0	0.010924	0.411478	0	0.0247091	0.0973104	0.135891	0.0195308	0	0	0.0579166	0.0130082	0.018937	0.0731661	0.0344039	0.00924874	0	0.0398782	0	0	0	0.02	0.232529	1.01997
TCGA-FD-A3SO-01A-11R-A22U-07	0.01197	0	0	0.0663558	0	0.149042	0.0546716	0.0419288	0.0171275	0	0.0332939	0.00801193	0.0723165	0.150868	0.16248	0.148694	0.010428	0	0.0591469	0	0	0.0136648	0.17	0.0739361	1.06104
TCGA-E7-A97P-01A-11R-A38B-07	0.0175601	0	0.00769441	0.344448	0	0.014321	0.178498	0.0719407	0	0	0.061464	0.0287662	0	0.0272234	0.131281	0.0468482	0.0183024	0.0114716	0.0401809	0	0	0	0.009	0.298717	0.977692
TCGA-GU-A767-01A-11R-A32O-07	0.0310187	0.0160907	0.0235636	0.0668818	0	0.178588	0	0.00184647	0.0130525	0	0	0.104454	0.127346	0	0.00706762	0.156809	0	0.0809374	0.192344	0	0	0	0.397	0.0251505	1.06484
TCGA-4Z-AA81-01A-11R-A39I-07	0.0725786	0	0.008433	0.330014	0	0	0.174037	0.0907062	0	0	0.00262463	0.0462033	0.00545405	0	0.00206111	0.0775015	0	0.146005	0.0443815	0	0	0	0.029	0.194923	1.01798
TCGA-E7-A85H-01A-11R-A352-07	0.10598	0	0.046227	0.157549	0	0	0.0651046	0.0566867	0.0880678	0	0	0.0523704	0.00893792	0.0875951	0.095606	0.0712655	0.111969	0	0.0526414	0	0	0	0.059	0.149538	1.02037
TCGA-G2-AA3C-01A-21R-A39I-07	0	0	0	0.051052	0	0.0766024	0	0	0.000677007	0	0	0.0621811	0.183906	0	0.011362	0.551138	0	0	0.0630812	0	0	0	0.304	0.0402507	1.09591
TCGA-E7-A8O8-01A-11R-A36F-07	0	0.0173101	0.0105412	0.103675	0	0.147173	0.0175801	0.0689656	0.00432456	0.00269306	0	0.128053	0	0.148688	0.0181901	0.107157	0.0675465	0.0587288	0.0993739	0	0	0	0.188	0.0670192	1.0603
TCGA-XF-A9SM-01A-11R-A42T-07	0.0124887	0	0.00180917	0.218596	0	0.102274	0.189829	0.0337887	0.00885821	0	0.0292743	0	0.00674532	0.0423114	0.0763312	0.214218	0.0155734	0	0.0424376	0	0	0.00546557	0.016	0.249706	0.982979
TCGA-DK-A3IN-01A-11R-A20F-07	0.075636	0	0.0365402	0.144443	0	0.219365	0.00451249	0	0.00724465	0	0	0.0300206	0.0101908	0.0175629	0.0401113	0.365254	0.0164282	0.00167952	0	0.0120936	0	0.0189182	0.033	0.179698	1.01426
TCGA-2F-A9KR-01A-11R-A38B-07	0.0640393	0	0.0490892	0.112477	0	0.118834	0.0271398	0.163107	0	0	0.00677656	0.0696918	0.0203692	0.0567822	0.000840409	0.0469984	0.0339023	0.112515	0.0732242	0	0.025034	0.0191793	0.304	0.040408	1.06563
TCGA-E5-A4U1-01A-11R-A31N-07	0.0562432	0	0	0.104888	0	0.225254	0	0.0389939	0	0	0.165414	0	0.0180968	0.0511729	0	0	0.1302	0.0435479	0.16619	0	0	0	0.793	-0.0154645	1.09577
TCGA-E7-A3Y1-01A-11R-A22U-07	0	0.0352643	0.0173589	0.142385	0	0.200002	0	0.116721	0.0295183	0.0088512	0	0.093873	0.00340325	0	0.0319299	0.148346	0.0486068	0.00338892	0.120351	0	0	0	0.31	0.0387862	1.0812
TCGA-FD-A6TC-01A-21R-A33J-07	0	0.0178987	0.0301986	0.0050688	0	0.102973	0	0	0.00439324	0	0.0269327	0	0	0.45644	0.00200357	0.23055	0	0.0410516	0	0.0737308	0	0.00875917	0.09	0.115155	1.09338
TCGA-FD-A5BV-01A-11R-A26T-07	0.097124	0	0	0.120305	0	0.193053	0	0	0	0	0	0.0781268	0.0190295	0	0.0427273	0.340615	0	0	0.0804452	0	0.0220636	0.0065104	0.362	0.0298161	1.07063
TCGA-DK-A2I4-01A-11R-A21D-07	0.0816617	0	0.0396763	0.171453	0	0.154526	0.0955978	0.0317734	0	0	0	0.0449579	0.0126413	0.0421966	0.0762114	0.170295	0.0171452	0	0.0548923	0	0	0.0069718	0.005	0.337983	0.943129
TCGA-UY-A78M-01A-21R-A352-07	0.0391328	0	0.00972708	0.0207457	0	0.0689426	0	0	0.0396753	0	0	0.0480467	0	0.541816	0.050287	0.063286	0	0.0472566	0.0710842	0	0	0	0.206	0.0637195	1.11781
TCGA-4Z-AA7R-01A-11R-A39I-07	0.0814643	0	0.0596215	0.0810651	0	0.0711054	0	0.0430913	0.0343708	0	0.024221	0	0	0.1675	0.00836986	0.337732	0	0.0185425	0	0.0663565	0	0.00655999	0.033	0.182703	1.01581
TCGA-HQ-A5NE-01A-12R-A28M-07	0.00944403	0	0.00382462	0.0443826	0	0.121554	0.0104393	0.0836563	0	0	0.087322	0	0	0.240949	0.00670877	0.0340808	0	0.189151	0	0.167527	0.000961141	0	0.073	0.134265	1.04784
TCGA-XF-AAMT-01A-11R-A42T-07	0.00250334	0.0252759	0.0064045	0.0292685	0	0.0869473	0	0	0.0363174	0	0	0.010722	0	0.342865	0.00903434	0.33701	0	0.00980195	0.090207	0	0	0.0136424	0.006	0.329323	0.963489
TCGA-XF-A9SU-01A-31R-A39I-07	0.231902	0	0.178583	0.121423	0	0	0.0183761	0	0.0307106	0.0102018	0	0.00326783	0.010256	0.0740254	0.147177	0.116001	0	0	0.0547354	0	0	0.00334117	0.001	0.448252	0.897671
TCGA-CF-A47S-01A-11R-A23W-07	0	0.0109463	0.0326027	0.123004	0	0.0862828	0	0.0296853	0.149717	0	0	0.0401486	0.0311895	0.0340804	0.105353	0	0.0998269	0.189747	0	0.0596803	0.00773632	0	0.079	0.124417	1.05216
TCGA-FD-A6TK-01A-42R-A33J-07	0.0274717	0	0.0293644	0.174401	0	0.0800677	0.185004	0.0342573	0.00386231	0	0.00942668	0.00178319	0.00296663	0.0414176	0.111632	0.176098	0.0242901	0.0210257	0.0731926	0	0	0.00373886	0.025	0.205944	0.996966
TCGA-E7-A5KF-01A-11R-A28M-07	0	0.0520056	0.0146063	0.0653735	0	0.242285	0	0.00649997	0.0591433	0	0.0572101	0	0.00855197	0.0228398	0.00180254	0.148954	0	0.238102	0	0.0578182	0.00512268	0.0196861	0.735	-0.0100488	1.0947
TCGA-UY-A78L-01A-12R-A33J-07	0	0.00602143	0.00990811	0.0472208	0	0.126581	0	0.0473207	0.0132493	0	0	0.0341592	0	0.295132	0.0412334	0.184036	0.0347771	0.0452557	0.0161233	0	0	0.0989821	0.156	0.0814411	1.07182
TCGA-S5-A6DX-01A-11R-A31N-07	0.156908	0	0.161319	0.164283	0	0	0.10216	0.00822375	0.0260368	0	0	0.014466	0.0110311	0.0580449	0.112711	0.0788504	0.0325805	0	0.068738	0	0	0.00464794	0.007	0.324654	0.955277
TCGA-XF-A8HI-01A-11R-A38B-07	0	0.0355786	0.0148772	0.0752569	0	0.273257	0.0158399	0.0154914	0.0957673	0	0.0195958	0	0	0.0542014	0	0.101619	0.0310375	0.138983	0	0.119101	0	0.00939351	0.176	0.0721985	1.06137
TCGA-XF-A9T5-01A-11R-A42T-07	0.113295	0	0.0872311	0.140214	0	0.105628	0.0687627	0.0443229	0.026011	0	0.0063802	0	0	0.149911	0.0925002	0.0925878	0.048579	0	0.0220282	0	0	0.00254941	0.003	0.384274	0.923137
TCGA-XF-A9SX-01A-21R-A39I-07	0.0562472	0	0.00228306	0.132149	0	0.153558	0.0781463	0.0391047	0.0533809	0	0	0.0580204	0	0.0631021	0.0782112	0.190809	0.00669552	0.0162686	0.0699886	0	0	0.00203569	0.009	0.301316	0.9601
TCGA-G2-A2EK-01A-22R-A18C-07	0.0893813	0.108388	0.0132292	0.0641871	0	0.24796	0.00564582	0	0.105354	0	0	0.0504648	0.00805336	0.0571536	0	0.0437718	0.0500183	0.0752648	0.0811274	0	0	0	0.016	0.24822	0.985339
TCGA-ZF-A9RE-01A-11R-A38B-07	0	0.0819261	0	0.15165	0	0.0459946	0	0.0808853	0	0	0.00539246	0	0.0252405	0.0746089	0	0.0248016	0	0.229034	0	0.147075	0	0.133392	0.174	0.0728711	1.06544
TCGA-E7-A7DV-01A-11R-A33J-07	0	0.00266773	0	0.0342373	0	0.124028	0.021722	0	0	0	0.0200829	0.00521086	0.0865593	0.21122	0.0848909	0.399914	0	0	0	0.00872075	0	0.000745637	0.004	0.357031	0.944549
TCGA-HQ-A2OF-01A-11R-A26T-07	0	0.00490941	0.00375158	0.144526	0	0.242461	0.0974962	0	0	0	0.0553044	0	0.0275488	0.0997816	0.0168198	0.265933	0.00703236	0.0109296	0	0.0235063	0	0	0.565	0.00645005	1.08821
TCGA-XF-AAN1-01A-31R-A42T-07	0.00671622	0.0286987	0.00140947	0.167649	0	0.185276	0	0.0730437	0.0120195	0	0	0	0.0448267	0.0146856	0.0257823	0	0.166933	0.206793	0	0.0661667	0	0	0.309	0.0390571	1.07975
TCGA-DK-AA6P-01A-11R-A39I-07	0.0544845	0.0180108	0	0.0968399	0	0.15513	0	0.0145912	0.0811029	0	0.0185785	0.0316667	0.00937935	0.175718	0.0194577	0.0646522	0.0436417	0.0583097	0.158436	0	0	0	0.413	0.022614	1.06867
TCGA-CF-A47Y-01A-11R-A23W-07	0.0228271	0	0	0.185991	0	0.332985	0	0.0190308	0	0.0356852	0	0	0.0257002	0	0.0334382	0.19225	0.0801833	0	0.0628065	0	0.00910253	0	0.37	0.0284708	1.0865
TCGA-CF-A3MI-01A-11R-A20F-07	0	0.0449134	0.00341921	0.182739	0.0336162	0.0328848	0.0898756	0	0.00646429	0	0	0.033554	0.0107081	0.145951	0.00604801	0.232706	0.0252329	0.0770462	0.0748411	0	0	0	0.317	0.0374941	1.06291
TCGA-G2-A2EL-01A-12R-A18C-07	0	0.0353492	0	0.143818	0	0	0.0941738	0.107245	0.00167054	0	0	0.0845644	0	0.239247	0.146379	0.00194724	0.0878276	0	0.0577788	0	0	0	0.957	-0.0328126	1.11302
TCGA-XF-AAMZ-01A-11R-A42T-07	0.396516	0	0.0263123	0.0625545	0	0.152584	0.0111973	0	0.119856	0	0	0	0.0257612	0.0268182	0.0339856	0.127211	0	0.00211871	0	0.00591159	0	0.00917311	0.001	0.415399	0.91658
TCGA-DK-AA6L-01A-11R-A39I-07	0.0453213	0	0.0155218	0.0710896	0	0.0950839	0.0180525	0.0507012	0.0383708	0	0	0.0326622	0.00827525	0.227497	0.0486499	0.120946	0.191525	0	0.0363029	0	0	0	0.013	0.257375	0.979607
TCGA-XF-A9T4-01A-11R-A39I-07	0.00510173	0	0.0215807	0.12052	0	0.199671	0.0181414	0.0461436	0	0	0	0.0784255	0.00166138	0.113167	0.127715	0.101682	0.0660863	0.00965822	0	0.0601357	0.0169912	0.0133191	0.022	0.213602	1.00481
TCGA-K4-A6MB-01A-11R-A31N-07	0	0	0	0.0309571	0	0.095419	0	0.0339984	0.0184844	0	0.0186704	0	0	0.500462	0.0210905	0.148682	0.00349223	0.0557631	0.068204	0	0	0.00477643	0.129	0.0927704	1.10192
TCGA-UY-A8OB-01A-12R-A42T-07	0	0	0.00224913	0.266348	0	0.107705	0.139992	0	0	0	0.0941218	0.0433057	0.0156003	0.105077	0.0424629	0.101171	0	0.0563877	0.025579	0	0	0	0.052	0.154285	1.03972
TCGA-DK-A1A5-01A-11R-A13Y-07	0	0.0223039	0	0.150399	0	0.0385029	0.0727348	0.0860312	0.00293908	0	0	0.00483637	0.00274452	0.273858	0.0409077	0.0788997	0.112629	0.0847684	0.0284456	0	0	0	0.034	0.177369	1.0177
TCGA-2F-A9KQ-01A-11R-A38B-07	0	0.00488052	0	0.0477565	0.0191154	0.177709	0	0	0	0	0	0.105606	0.0769977	0.0251906	0	0.121808	0.138479	0.143786	0.137839	0	0	0.000833192	0.94	-0.0295107	1.08692
TCGA-SY-A9G0-01A-12R-A38B-07	0.362404	0	0.122846	0.0473999	0	0.0991048	0	0.0172718	0.0155431	0	0	0.0336643	0.00250451	0.0367633	0.00864626	0.0867225	0.021994	0.0188739	0.126261	0	0	0	0	0.513362	0.857982
TCGA-GV-A40G-01A-11R-A23N-07	0.0157975	0	0.0108009	0.082828	0	0.320578	0	0.0764869	0	0	0	0.106553	0.0675499	0.131859	0	0.0101971	0	0.0331223	0.105073	0	0	0.0391543	0.522	0.0100975	1.09581
TCGA-FD-A5BX-01A-11R-A26T-07	0.00209301	0.00304438	0	0.0668958	0	0.098861	0	0	0	0.0186389	0	0.0213942	0.0109257	0.35753	0.0556912	0.221266	0.120208	0	0.0234513	0	0	0	0	0.671561	0.756856
TCGA-BL-A13J-01A-11R-A10U-07	0.0454273	0	0.0127681	0.127529	0	0	0.0892977	0.027706	0.0291513	0	0.0336297	0	0	0.259382	0.108882	0.169164	0	0.0368578	0.057372	0	0	0.0028338	0.64	-0.00124048	1.09298
TCGA-ZF-AA54-01A-11R-A39I-07	0.00432371	0.00183714	8.25847e-05	0.0776088	0	0.085879	0.0120921	0.0238183	0.0124979	0	0.00434694	0.011294	0	0.213449	0.0445694	0.47503	0.00344255	0	0.0297284	0	0	0	0	0.646068	0.775059
TCGA-GU-A766-01A-11R-A32O-07	0.00911525	0	0.00194242	0.15422	0	0.0344717	0.245104	0.0387302	0	0	0.0636042	0.0316357	0.049487	0.0349914	0.181584	0.0490299	0	0.101586	0.0015089	0	0	0.00298775	0.002	0.406279	0.919022
TCGA-LT-A8JT-01A-11R-A36F-07	0.0231729	0.0492724	0	0.144188	0	0.337981	0	0.0971366	0.00806585	0	0	0.0127396	0.0316412	0.0429281	0.0599463	0.0477129	0.0308041	0.072655	0.0417554	0	0	0	0.116	0.0987824	1.06442
TCGA-FJ-A3Z9-01A-11R-A26T-07	0	0.0226749	0.0127455	0.0206209	0.193641	0.0505015	0	0	0.0138331	0	0.00844021	0.0631513	0.00663457	0.296198	0	0.036418	0.101636	0.113764	0.0597415	0	0	0	0.283	0.0435759	1.0768
TCGA-DK-A1AC-01A-11R-A13Y-07	0.0874334	0	0.0890431	0.186504	0	0.156339	0.0768696	0.0575394	0.0226706	0	0.000756707	0	0.0100077	0.100336	0.0503835	0.0997967	0.00714045	0	0	0.0366562	0.0185246	0	0.009	0.304466	0.960418
TCGA-C4-A0F1-01A-11R-A034-07	0.0320294	0	0.0577826	0.0271466	0	0.179574	0	0.0258658	0.00924253	0	0	0.0501979	0	0.095623	0.148256	0.102135	0.0847998	0.0165619	0	0.129309	0.0195606	0.0219158	0.02	0.230344	0.995151
TCGA-G2-A2ES-01A-11R-A180-07	0	0	0.00194761	0.0871967	0	0.124681	0.148631	0.0214217	0.00662702	0	0.0395212	0.00745732	0	0.188025	0.0901131	0.161494	0	0.0783284	0.00828871	0	0.0333452	0.00292164	0.012	0.269464	0.976294
TCGA-XF-AAN4-01A-11R-A42T-07	0.0297729	0	0	0.0722203	0	0.0766634	0.0577593	0.0190082	0.00517787	0.0100632	0	0.0386268	0.0746179	0	0.146064	0.202368	0.0272504	0.0232355	0.190166	0	0.027007	0	0.001	0.480993	0.878418
TCGA-4Z-AA83-01A-11R-A39I-07	0	0	0	0.0429038	0	0.0756994	0	0.0236864	0.0821956	0	0	0.0705213	0	0.214975	0.0448149	0.123348	0.0580155	0.172154	0	0.0412235	0	0.0504627	0.143	0.0855386	1.06546
TCGA-4Z-AA7N-01A-11R-A39I-07	0.28763	0.103483	0.0135267	0.0682166	0	0.13993	0.0299293	0.0903447	0.07243	0	0	0	0	0.105971	0.0215901	0.0349582	0.00958008	0.0100159	0.0123947	0	0	0	0	0.528046	0.848441
TCGA-HQ-A2OE-01A-11R-A206-07	0.0556515	0	0.0685215	0.130252	0	0.0701568	0.0443636	0.0263244	0.0684686	0	0.0407903	0	0.0186627	0.000166663	0.0245128	0.137761	0.142493	0.114587	0	0.0373227	0.00794311	0.0120222	0.059	0.148777	1.01627
TCGA-UY-A8OC-01A-11R-A36F-07	0	0.0218204	0.0479797	0.0318321	0	0.0106895	0	0.0727673	0.0197513	0	0	0.0108226	0	0.584334	0.0195116	0.129652	0.0455007	0	0.00273534	0	0.00260337	0	0	0.523477	0.857748
TCGA-GV-A3JV-01A-11R-A220-07	0.141538	0	0.0996219	0.179163	0	0.119222	0.0784794	0.0591916	0.040967	0.0117839	0	0.00530941	0	0.0430969	0.0724415	0.0704133	0.0383004	0	0.040472	0	0	0	0.004	0.354448	0.939067
TCGA-XF-A9T8-01A-11R-A39I-07	0.00144118	0	0.0012214	0.214783	0	0.123159	0.0885055	0.0361097	0	0	0.0379671	0.0208837	0	0.116082	0.0880515	0.125946	0.00102683	0.047809	0.0235394	0	0.0109296	0.0625456	0.003	0.381263	0.925798
TCGA-KQ-A41S-01A-12R-A33J-07	0.0451752	0	0	0.0768911	0	0.217431	0.00412594	0.0260375	0	0	0	0.0503413	0.0447119	0.043398	0.0310419	0.29751	0.0127095	0.0320939	0.0894117	0	0.0130222	0.016099	0.362	0.029707	1.06463
TCGA-CU-A3YL-01A-11R-A22U-07	0.0245498	0	0.0171598	0.266103	0	0.157655	0.0179722	0.0960802	0.0345814	0	0.00383544	0.00918703	0.0161687	0.0253324	0.115908	0.0837482	0.0767759	0.012843	0.0420996	0	0	0	0.406	0.0238094	1.09612
TCGA-E7-A7XN-01A-11R-A352-07	0	0	0.00269357	0.375662	0	0	0.177816	0.0264979	0.0232803	0	0.0881016	0	0.0109609	0	0.144111	0.0606524	0.0568102	0.0123168	0.0210975	0	0	0	0.007	0.32248	0.966211
TCGA-DK-A2HX-01A-12R-A18C-07	0.0490615	0	0.00159695	0.0624342	0	0.160794	0.00547419	0.0084116	0.0562652	0	0	0.0582045	0.0186698	0.0323798	0.00444545	0.199615	0	0.12793	0.214144	0	0	0.000575069	0.161	0.0788089	1.04613
TCGA-CF-A8HY-01A-11R-A36F-07	0	0.0728376	0.0118146	0.137051	0.0412108	0.111878	0	0	0	0	0.0835323	0	0.0289931	0	0	0.0126383	0.329362	0.122859	0.0111833	0.0366409	0	0	0.396	0.0253178	1.07444
TCGA-4Z-AA7W-01A-11R-A39I-07	0.0557328	0	0.0167992	0.35456	0	0	0.19024	0.0885382	0	0.0269341	0.0108817	0.0308984	0.00172617	0.00879048	0.0521696	0.0860755	0.0223214	0.0230898	0.0267738	0	0	0.00446954	0.033	0.17949	1.02937
TCGA-FD-A43U-01A-11R-A23W-07	0.0218559	0.0196417	0.00634905	0.0898938	0	0.0799584	0.0197973	0.00502074	0.0552072	0	0	0.0281422	0.0262781	0.451355	0.0212219	0.123853	0.0083747	0	0.0430513	0	0	0	0.101	0.106004	1.07612
TCGA-BL-A0C8-01A-11R-A277-07	0.000685817	0	0.00454621	0	0	0.239786	0	0	0	0	0.00395608	0.0321852	0.0468263	0.324189	0.00114419	0.334507	0	0	0	0.0035031	0.00232417	0.00634763	0.433	0.0206878	1.11969
TCGA-BT-A0S7-01A-11R-A10U-07	0.122317	0	0	0.0880458	0	0.173613	0.0215299	0.0487636	0.0100097	0	0.0320173	0	0	0.138763	0.0293302	0.229558	0.0613515	0.00190218	0.0117974	0.0140704	0	0.01693	0.18	0.0691509	1.05438
TCGA-ZF-A9R3-01A-11R-A38B-07	0	0.0202027	0.0628438	0.0473485	0	0.163489	0.00759324	0.0635024	0.0997648	0	0	0.0417099	0.00820365	0	0.00397205	0.0480568	0.245781	0.123567	0.0604385	0	0	0.00352679	0.269	0.0473099	1.0605
TCGA-4Z-AA89-01A-11R-A39I-07	0	0.053911	0	0.166145	0	0.0372895	0	0.232205	0	0	0	0.0224582	0	0	0.190221	0.162284	0.0229763	0.0783488	0.034161	0	0	0	0.514	0.0116838	1.11442
TCGA-GU-A42P-01A-11R-A23W-07	0.111902	0	0	0.0621237	0	0.232518	0	0.0532355	0	0	0	0.00780722	0.0198195	0.210093	0	0	0	0.179031	0.12347	0	0	0	0.77	-0.0136943	1.0917
TCGA-FD-A3NA-01A-11R-A21D-07	0.00144989	0	0.00132382	0.219748	0	0	0.196353	0.00431882	0.000131262	0	0.0353559	0.0129888	0.0128158	0.0945637	0.0767844	0.14017	0.0763835	0.0323584	0.0822251	0	0	0.0130299	0.106	0.102735	1.03663
TCGA-E7-A5KE-01A-11R-A28M-07	0.0486633	0	0	0.0435228	0.0766028	0	0	0	0.0267935	0	0.299329	0	0.0415791	0.0478459	0.0131049	0	0	0.248963	0	0.148593	0.00500256	0	0.781	-0.0144337	1.13773
TCGA-ZF-AA4V-01A-11R-A38B-07	0.00245696	0	0.0159941	0.255541	0	0.0653067	0.0948888	0.053942	0.0227744	0.0596853	0	0.0483625	0	0.116381	0.0977052	0.0912617	0.0327273	0.00565153	0.0373207	0	0	0	0.018	0.24174	0.995513
TCGA-ZF-AA53-01A-11R-A39I-07	0.0129308	0	0.00182749	0.122291	0	0.0997242	0.0460847	0.0476256	0.00129495	0	0	0.0619868	0.0190803	0.081955	0.170833	0.202512	0.0954778	0	0.0152527	0	0.0100007	0.011122	0.013	0.263159	0.982777
TCGA-ZF-A9RM-01A-11R-A38B-07	0.025744	0	0.000359487	0.231955	0	0.211363	0	0.0420246	0	0	0	0.146593	0.0390609	0.0619827	0.0406811	0.067979	0.0479885	0.0302313	0.0540377	0	0	0	0.72	-0.00860821	1.12015
TCGA-BL-A13I-01A-11R-A13Y-07	0.00791257	0	0	0.0420182	0	0.167458	0.00717252	0.0446677	0.0368139	0	0	0.00890572	0.0320889	0.0304713	0.0239926	0.521891	0	0	0.0746487	0.00195854	0	0	0	0.603694	0.810202
TCGA-CU-A72E-01A-12R-A33J-07	0	0.0192502	0	0.0318104	0	0.143319	0	0.0227408	0.00487975	0	0	0.0257903	0	0.42647	0.0306643	0.193683	0.0109701	0	0.0676242	0	0.0227978	0	0.021	0.219422	1.02229
TCGA-CF-A47W-01A-11R-A23W-07	0	0.0456727	0.0315911	0.162843	0	0.122301	0	0	0	0	0.0394612	0.0794565	0.0457743	0	0.0101892	0.265449	0.0186178	0.108878	0.0697658	0	0	0	0.768	-0.013247	1.08556
TCGA-GC-A3I6-01A-11R-A20F-07	0	0	0.00486338	0.0373518	0	0.144254	0.0447917	0.0603078	0	0	0.0356482	0.0519052	0	0.102545	0.151388	0.133347	0	0.112789	0.120809	0	0	0	0.004	0.3459	0.944347
TCGA-FD-A6TA-01A-12R-A33J-07	0.173071	0	0.17437	0.0835849	0	0.146271	0.00136113	0.030215	0.0170998	0	0	0.0212361	0.0147903	0.109115	0.0910897	0.104093	0.00091697	0	0.0313282	0	0	0.00145787	0.001	0.423573	0.907495
TCGA-CF-A47X-01A-31R-A23W-07	0.000949639	0.0725435	0.0421133	0.124223	0	0.0257236	0	0.081509	0.080576	0	0	0	0	0.120487	0	0.134271	0.0875175	0.215231	0	0.0148555	0	0	0.531	0.009356	1.08307
TCGA-ZF-AA51-01A-21R-A39I-07	0.00499056	0.000590745	0.0340931	0.146682	0	0.0970995	0.0623223	0.0703959	0.117436	0	0	0.00887506	0	0.206754	0.106759	0.12002	0.00515709	0.00702823	0.00699234	0	0	0.00480338	0.183	0.068042	1.07034
TCGA-FD-A62O-01A-11R-A30C-07	0.0932587	0	0.121064	0.0734594	0	0.116077	0	0.00898921	0.0291856	0	0.0111437	0	0.0110678	0.163325	0	0.110811	0	0.073882	0	0.111142	0	0.0765949	0.126	0.0940094	1.05062
TCGA-BL-A3JM-01A-12R-A21D-07	0.0260918	0	0.0118153	0.0869859	0	0	0.0208272	0.0643453	0.00498258	0.0314855	0	0.0118144	0	0.469618	0.127495	0.0856029	0.00562231	0	0.0533136	0	0	0	0	0.669913	0.752569
TCGA-FJ-A3ZF-01A-11R-A23N-07	0	0.111231	0.0329859	0.203168	0.00330713	0	0	0.0603623	0.0589931	0	0	0.0996583	0.0139105	0.0182075	0.00539391	0.185543	0	0.133603	0.0736364	0	0	0	0.145	0.085109	1.05114
TCGA-CU-A0YO-01A-11R-A10U-07	0.00841709	0.026375	0.0246006	0.100557	0	0.150902	0.04016	0.0300528	0.0517618	0	0	0.0412758	0	0.0430982	0.0622625	0.0884828	0.054323	0.14072	0.121554	0	0.00489991	0.0105567	0.069	0.139823	1.024
TCGA-CF-A5UA-01A-11R-A28M-07	0	0.0811255	0.0122174	0.206104	0	0.058607	0	0.0758584	0.0393263	0	0.00661906	0.00441733	0	0.115619	0	0.158481	0.19082	0.023265	0.02754	0	0	0	0.083	0.121258	1.03465
TCGA-K4-AAQO-01A-11R-A38B-07	0.236886	0	0.0660603	0.0922138	0	0.0568066	0.0117921	0.020265	0.0508887	0	0	0.0408782	0.0164907	0.0251001	0.0615014	0.156679	0.0272905	0.0131516	0.123995	0	0	0	0.001	0.43788	0.898202
TCGA-FD-A3SM-01A-11R-A22U-07	0	0.00721123	0.0233356	0.0172827	0	0.147798	0	0.0454132	0	0.00201096	0	0.0201661	0	0.519605	0.0632335	0.060959	0	0.0153417	0.0776428	0	0	0	0.168	0.0773341	1.10355
TCGA-BL-A5ZZ-01A-31R-A30C-07	0.00667728	0	0.00112683	0.0122667	0	0.117027	0.0352235	0.0054925	0	0.000552386	0.0317505	0.0201495	0	0.449947	0.00170997	0.232349	0	0.0203375	0	0.0605295	0	0.00486157	0.001	0.440431	0.90663
TCGA-FD-A62N-01A-11R-A30C-07	0.0411855	0	0.0514557	0.236938	0	0.106747	0.0938473	0.0180627	0.0174359	0	0	0.0109597	0.00602532	0.0567344	0.142612	0.113591	0.0421258	0	0.0587637	0	0	0.00351548	0.034	0.175862	1.01691
TCGA-BT-A20J-01A-11R-A14Y-07	0.034905	0	0	0.185355	0	0.18007	0.0133437	0.054283	0.0202867	0.00751817	0	0.0402485	0	0.125011	0.146651	0.121478	0.0259505	0	0.0443931	0	0	0.000504726	0.114	0.0996072	1.06015
TCGA-FT-A61P-01A-11R-A30C-07	0.0307652	0	0.0140083	0.0719756	0	0.108658	0.119946	0.0675817	0	0	0.015118	0.0193508	0.0092397	0.144719	0.0880327	0.186185	0.0490217	0.00759123	0.0678079	0	0	0	0.02	0.237195	0.98339
TCGA-DK-AA77-01A-11R-A39I-07	0.00912545	0	0.00812751	0.264585	0	0.111963	0.117681	0.0901292	0	0	0.000487856	0	0.00728587	0	0.0760697	0.083697	0.0516212	0.139036	0.036252	0	0	0.00393882	0.043	0.162093	1.03139
TCGA-ZF-AA5N-01A-11R-A42T-07	0.176336	0	0.0436515	0.00279852	0	0.0312811	0.148512	0.00817342	0.0319146	0	0	0.0529246	0	0.134844	0.0349537	0.0981596	0	0.196933	0.00787452	0.0124036	0	0.0192396	0.034	0.175438	1.01681
TCGA-DK-AA6U-01A-11R-A39I-07	0.158398	0	0.0227636	0.193106	0	0.00611157	0	0	0.117008	0	0	0.0231835	0.0585224	0	0.0628614	0.126771	0.0817212	0.0791733	0.0273046	0	0	0.0430747	0.253	0.0498964	1.0609
TCGA-BT-A20O-01A-21R-A14Y-07	0.0293662	0	0.00589605	0.337488	0	0.122771	0.109049	0.0419621	0	0	0	0.0125309	0.00924369	0	0.0807044	0.157688	0.0104292	0	0.0764606	0	0	0.00640914	0.081	0.122109	1.04907
TCGA-GD-A3OS-01A-12R-A220-07	0.0604644	0	0	0.0623983	0	0.183342	0.000163892	0.04941	0.0509926	0	0.00959342	0	0	0.35905	0.0113176	0.199111	0	0.0141565	0	0	0	0	0.069	0.138886	1.05399
TCGA-XF-A9SZ-01A-11R-A39I-07	0.000519704	0.0205789	0	0.0273291	0	0.0485837	0.00679064	0.00623171	0.00968735	0	0.0750589	0	0	0.485948	0.0121246	0.164146	0	0	0	0.104584	0	0.0384176	0.112	0.10043	1.10634
TCGA-4Z-AA82-01A-11R-A39I-07	0	0.049958	0.00536143	0	0	0.179308	0	0.0651901	0.00164104	0	0	0.0727222	0.0124868	0.0300566	0	0.0348682	0.245335	0.220276	0.076624	0	0	0.00617217	0.02	0.237088	0.987829
TCGA-DK-AA76-01A-11R-A39I-07	0	0.079309	0	0.0818117	0	0.202622	0	0	0.116069	0	0	0.00214576	0.0206982	0.182098	0	0.146474	0	0.0800536	0	0.0887184	0	0	0.462	0.0165667	1.08256
TCGA-DK-A3IL-01A-11R-A20F-07	0.404571	0	0.0236241	0.0588315	0	0.0550781	0	0.0868201	0.0190219	0	0	0.031118	0	0.146332	0.0520221	0.0324847	0	0.0411445	0.048952	0	0	0	0.178	0.0706777	1.09392
TCGA-E7-A678-01A-11R-A30C-07	0	0	0.18228	0.140466	0	0.355064	0	0.0104532	0.044797	0.0158288	0	0.0694709	0.000393878	0.0350452	0.0174798	0.0322097	0	0.0411475	0.0553642	0	0	0	0.019	0.239575	1.01017
TCGA-ZF-A9R1-01A-11R-A39I-07	0.241844	0	0.0264324	0.197107	0	0.08268	0	0.0332001	0.0429329	0	0	0.0522339	0.00977606	0.0895857	0.0255854	0.066228	0.0338146	0.0300741	0.0685058	0	0	0	0.073	0.133299	1.03952
TCGA-XF-A9SH-01A-11R-A39I-07	0.00159202	0.0506101	0.048126	0.0455434	0	0.186908	0	0.00151995	0.053841	0	0	0.0363688	0	0.130355	0.00984795	0.220457	0.113377	0.0311427	0.0572038	0	0.00785334	0.00525463	0.04	0.167844	1.0114
TCGA-FD-A5BU-01A-31R-A26T-07	0.11905	0	0.119521	0.0147402	0	0.156482	0.0252078	0.0411043	0.0147803	0	0.0159852	0.0236914	0.00756709	0.132822	0.101031	0.0485086	0.113064	0	0.0645178	0	0	0.00192728	0.003	0.360591	0.933532
TCGA-C4-A0F7-01A-11R-A084-07	0	0.0109155	0	0.165966	0	0.21222	0	0	0	0	0.0104059	0	0.0651015	0.154675	0.0633016	0.0750043	0.0500151	0.104573	0.0466185	0.0058687	0	0.035335	0.448	0.0186313	1.07987
TCGA-C4-A0F0-01A-12R-A10U-07	0.00689401	0	0.00343992	0.158231	0	0.18674	0.0659034	0	0	0	0.00462071	0	0	0.102218	0.101014	0.172368	0.113659	0.00884466	0.0493358	0.00643744	0	0.0202924	0.015	0.252431	0.980313
TCGA-FD-A3N5-01A-11R-A21D-07	0.00844916	0	0.00913397	0.110595	0	0.0937045	0.100295	0.0385677	0	0	0.00243567	0.0635768	0	0.360564	0.0372011	0.0905615	0.0539901	0.00651255	0	0.010941	0	0.0134725	0.021	0.219693	1.00948
TCGA-ZF-A9R5-01A-12R-A42T-07	0	0.0756855	0.00952068	0.14515	0	0.344716	0.0174368	0.0747833	0.0327533	0	0.0315889	0	0.0154599	0.0159998	0	0.0964243	0	0.0546476	0.0858343	0	0	0	0.087	0.116592	1.05731
TCGA-CU-A3KJ-01A-11R-A21D-07	0	0	0.00314411	0.120706	0	0.220076	0.0746409	0.0437974	0	0	0.041816	0	0.00796031	0.157684	0.0717418	0.0752207	0.0356799	0.0449594	0	0.0835105	0	0.0190623	0.308	0.0392285	1.07494
TCGA-DK-AA6S-01A-21R-A39I-07	0	0	0.00318525	0.132098	0	0.211748	0.0776508	0.079935	0.0407904	0	0	0	0	0.10484	0.163767	0.115231	0.0397398	0	0.0309763	0	0	3.77345e-05	0.003	0.368701	0.934655
TCGA-BT-A42E-01A-11R-A23W-07	0	0	0.00093454	0.146714	0	0.0853747	0.0885482	0.103448	0.027747	0	0	0.0747928	0	0.101633	0.134571	0.130088	0.0802025	0.0192591	0	0.00668782	0	0	0.019	0.23907	0.99558
TCGA-FD-A43X-01A-11R-A23W-07	0	0.0693004	0.0780452	0.140066	0	0.116801	0	0.0563704	0.0196603	0	0.0581	0.019193	0.0299613	0.128612	0.00844444	0.181763	0	0.0123141	0.0813682	0	0	0	0.597	0.00278286	1.07774
TCGA-ZF-AA4R-01A-11R-A38B-07	0	0.00502145	0.0111489	0.0917854	0	0.0439958	0	0.0775296	0.031606	0	0	0.0455745	0	0.429458	0.129565	0.0281492	0	0.0659248	0.0402413	0	0	0	0.028	0.196587	1.03568
TCGA-BT-A20T-01A-11R-A14Y-07	0	0.0111794	0.00188041	0.167315	0	0.209126	0.0424952	0.0598525	0.0344022	0.0113365	0	0.0457108	0	0.0640628	0.078041	0.121736	0.0742392	0.0267112	0.0519114	0	0	0	0.072	0.135529	1.03741
TCGA-E7-A7DU-01A-11R-A32O-07	0	0.0345945	0.0145128	0.0615577	0	0.209326	0	0.0253054	0.0241144	0	0	0.0462414	0.0129341	0	0	0.270844	0	0.205364	0.0952054	0	0	0	0.75	-0.0117486	1.08569
TCGA-DK-A3WY-01A-11R-A22U-07	0.327808	0.122924	0.0766214	0.0923843	0	0.0926107	0.0249825	0.0682582	0.0471109	0	0	0	0	0.062638	0.0424792	0.0280427	0	0	0.0141407	0	0	0	0	0.553686	0.832701
TCGA-G2-A2EF-01A-12R-A18C-07	0.0264073	0	0.00987835	0.177215	0	0.0575381	0.25671	0.00660131	0	0	0.074987	0	0.00401292	0.0583965	0.130439	0.118216	0.0757787	0	0.00381998	0	0	0	0.022	0.215794	0.999921
TCGA-BT-A20V-01A-11R-A14Y-07	0	0.0264192	0	0.132176	0	0.140624	0.119654	0.0208054	0.0023554	0	0	0.0964164	0.0716773	0.114297	0.102243	0.00914913	0.0609198	0.0358086	0.0623298	0	0.00512449	0	0.068	0.141313	1.03057
TCGA-K4-A3WV-01A-11R-A22U-07	0	0.0427101	0.0077934	0.0577374	0	0.0179524	0	0.0978159	0	0	0	0.0181412	0	0.444241	0.0892929	0.0168992	0	0.0536522	0	0.138117	0	0.0156465	0.548	0.00803446	1.13428
TCGA-GU-AATQ-01A-11R-A39I-07	0	0.00925553	0	0.00860563	0	0.191737	0	0.0626796	0.01407	0.000183163	0	0.0513566	0	0.275526	0.189082	0.123136	0.0365393	0	0.0378295	0	0	0	0.019	0.23811	1.00586
TCGA-CF-A3MF-01A-12R-A21D-07	0.0240541	0	0.0809539	0.362016	0	0	0.0784251	0.133822	0	0	0.00842624	0	0.0473913	0.0540376	0.00361719	0.0367435	0	0.0913915	0	0.0655106	0.013611	0	0.121	0.0963697	1.06007
TCGA-CF-A47T-01A-11R-A23W-07	0.0626282	0.0361423	0	0.174183	0	0.0693164	0	0.123495	0.00533108	0	0.00810007	0.00237591	0.0646748	0	0	0.136177	0.176454	0.115004	0	0.0202769	0	0.00584239	0.098	0.108374	1.03582
TCGA-YC-A8S6-01A-31R-A38B-07	0	0.0111963	0	0.0168129	0	0.184373	0.0491186	0	0.0977429	0	0	0	0.0730482	0	0.00376739	0.101899	0.0595148	0.166632	0.0969217	0.0952237	0.00896371	0.0347851	0.011	0.279751	0.967144
TCGA-DK-A3IS-01A-21R-A21D-07	0	0.00929559	0	0.285519	0	0.0780754	0.0722576	0.160295	0.00272541	0	0	0.0422503	0.00774732	0	0.0758644	0.0826519	0.0818678	0.0314501	0.0648925	0	0	0.00510696	0.45	0.018475	1.09823
TCGA-XF-A9SJ-01A-11R-A39I-07	0.0958215	0	0.065823	0.232892	0	0.0942374	0.0781955	0.0195327	0.0148063	0	0.0591285	0.00730054	0.0141269	0.0507051	0.106406	0.13143	0.0068105	0	0.0227846	0	0	0	0.009	0.294707	0.966155
TCGA-DK-AA6T-01A-11R-A39I-07	0.0659297	0.524589	0	0.118729	0	0	0.0258063	0.0551087	0.00927358	0	0	0.0171588	0.00682012	0	0.00969797	0.0616637	0	0.0912575	0.0139655	0	0	0	0.002	0.406406	0.932993
TCGA-BT-A20N-01A-11R-A14Y-07	0.195768	0	0.147572	0.0695616	0	0.0911627	0.0167313	0.0603132	0	0	0.00250071	0	0.00759391	0.0605738	0.152192	0.074919	0.0951139	0.0108361	0	0	0	0.0151618	0.01	0.289924	0.978607
TCGA-XF-AAMW-01A-11R-A42T-07	0.00633792	0.00664534	0.00311941	0.00780794	0	0.230074	0.0403647	0.0173178	0.0159037	0	0.01425	0	0.0103449	0.156171	0.116965	0.171688	0.112417	0.0506091	0.0175131	0	0.0079497	0.0145219	0.074	0.129504	1.03664
TCGA-BT-A3PJ-01A-21R-A220-07	0	0	0.00317712	0.101819	0	0.170499	0.087942	0.0586973	0.021811	0	0.0418619	0.0207399	0	0.130717	0.159632	0.130162	0.0061622	0.00328878	0	0.059519	0	0.00397145	0.015	0.251845	0.991211
TCGA-GC-A3OO-01A-11R-A22U-07	0.00592475	0.0410641	0.00109794	0.0265094	0	0.0469222	0	0.0305487	5.17253e-05	0	0	0.0177205	0	0.390537	0.0310494	0.216758	0.0177997	0.00981808	0.143639	0	0.0205596	0	0.001	0.445136	0.898038
TCGA-E7-A6ME-01A-22R-A32O-07	0.0552741	0	0.00547	0.330112	0	0.120916	0.0433093	0.132019	0.0317577	0	0	0.0306659	0	0.0387936	0.063275	0.0735739	0	0.0506963	0.01861	0	0	0.00552817	0.065	0.144412	1.05726
TCGA-XF-AAN5-01A-11R-A42T-07	0.0139273	0	0.00378291	0.169559	0	0.12979	0.127729	0.050204	0	0	0.0577514	0.0210218	0	0.0973205	0.0959826	0.121982	0.0271088	0	0.0337047	0.0150792	0.0199002	0.015156	0.021	0.227135	0.994064
TCGA-FD-A3SN-01A-12R-A22U-07	0	0	0.00718625	0.240822	0	0.0618726	0.0943491	0.0342591	0	0	0.0192353	0.047132	0.00183543	0.154972	0.0577561	0.177716	0	0.05655	0.0350495	0	0	0.0112644	0.081	0.122064	1.04175
TCGA-ZF-A9R2-01A-11R-A39I-07	0	0.0635315	0.028575	0.0891052	0	0.171409	0	0.22944	0	0	0.0171783	0	0.0147131	0.00397477	0	0.130357	0.0698121	0.147711	0	0	0.0237894	0.0104033	0.454	0.0180737	1.08488
TCGA-ZF-AA4T-01A-11R-A38B-07	0.0189964	0.0119112	0.00815194	0.0577956	0.0008128	0	0	0.0479099	0.0507366	0	0.0397994	0	0	0.28639	0.00598008	0	0	0.265892	0	0.200215	0	0.00540917	0.245	0.0527973	1.10389
TCGA-E7-A4IJ-01A-31R-A26T-07	0.0122106	0	0	0.265285	0	0.0750676	0.0253748	0.204129	0.00943198	0.0950915	0.0419616	0.02529	0	0.0129422	0.0347558	0.071135	0.00821793	0.0981126	0.0209939	0	0	0	0.131	0.0904897	1.09351
TCGA-FD-A6TE-01A-12R-A33J-07	0.0549002	0	0.101424	0.133845	0	0.193961	0.0622737	0.138819	2.88322e-05	0	0.00545606	0.0169058	0.00290652	0.0377059	0.136341	0.0288887	0.0194212	0.0338315	0.0332924	0	0	0	0.028	0.199436	1.01845
TCGA-H4-A2HO-01A-11R-A180-07	0.0945654	0	0.00972421	0.148132	0	0.146506	0.0307543	0.00707519	0.107094	0	0.0384235	0	0.00492845	0.223011	0.00918158	0.0630621	0.00233186	0.0914896	0	0.0237204	0	0	0.461	0.0168583	1.08682
TCGA-FD-A6TB-01A-12R-A33J-07	0.291412	0	0.0554442	0.135849	0	0.0474742	0.094293	0	0.0196275	0	0	0.0526774	0	0.0787265	0.0779035	0.0901132	0	0	0.0531788	0	0	0.00330051	0.001	0.450459	0.892192
TCGA-XF-AAN3-01A-11R-A42T-07	0	0.0245999	0.0017207	0.0345332	0	0.194609	0.00826913	0.0356421	0.0525719	0	0.00886146	0	0.00872222	0	0.0185775	0.197305	0.223939	0.0788786	0.0936144	0	0	0.0181571	0.033	0.179942	1.00533
TCGA-XF-AAMH-01A-11R-A42T-07	0.0496206	0	0.0110381	0.182635	0	0	0.0543019	0.00388488	0.0100987	0	0	0.0314511	0	0.332592	0.0180419	0.193794	0	0.049872	0.0626697	0	0	0	0.146	0.0842772	1.06673
TCGA-FD-A3B8-01A-31R-A20F-07	0.0756297	0	0	0.138456	0	0.181763	0.0624249	0	0	0	0.0554756	0	0.00421373	0.0992485	0.160276	0.0963251	0.0246618	0	0.0825667	0	0	0.0189594	0.001	0.493689	0.870634
TCGA-XF-A9SY-01A-21R-A42T-07	0.0257973	0	0.00348075	0.130551	0	0.118243	0.0939338	0.0209017	0	0	0.0383113	0.0305997	0	0.154188	0.130546	0.119891	0.00841317	0	0	0.125143	0	0	0.126	0.0948388	1.05991
TCGA-CU-A0YN-01A-21R-A10U-07	0.0205453	0	0.00296274	0.14417	0	0.270356	0.0032129	0	0	0	0.0390682	0	0	0.224099	0.0134737	0.077245	0.0412349	0.040155	0	0.0968816	0	0.0265958	0.106	0.103099	1.05466
TCGA-FD-A5BZ-01A-11R-A28M-07	0.106342	0	0.0128962	0.00659768	0	0.0586176	0	0.0315813	0.0226207	0.00882707	0	0.0157662	0	0.419752	0.0871063	0.131116	0	0	0.0983717	0	0	0.00040647	0.033	0.177967	1.03692
TCGA-BT-A20P-01A-11R-A14Y-07	0	0.0545223	0.0272763	0.156907	0	0.157892	0	0.0237063	0.00115761	0	0	0.0773368	0.0115562	0.0811062	0	0.199324	0.000355979	0.205075	0	0.00378571	0	0	0.368	0.0288664	1.08179
TCGA-XF-A8HD-01A-11R-A36F-07	0.205585	0	0.0504776	0.205261	0	0.0113089	0.08192	0.0525332	0.00577245	0	0.00596839	0.0714382	0.0120081	0.00913432	0.0343899	0.0532608	0	0.1306	0.0658411	0	0	0.00450087	0.001	0.473615	0.880105
TCGA-GV-A3JX-01A-11R-A20F-07	0.0990441	0	0.0168271	0.145843	0	0.134616	0.0362408	0.088534	0.0170735	0.0122204	0.0284425	0	0	0.0562289	0.0958788	0.204759	0.0213666	0.0175228	0.0254023	0	0	0	0.016	0.245185	0.984944
TCGA-H4-A2HQ-01A-11R-A180-07	0	0.00228873	0.00779474	0.0862328	0	0.2166	0.031258	0.118561	0	0	0.0385552	0	0.00984148	0	0.151653	0.104049	0.0829926	0.144755	0.00541815	0	0	0	0.236	0.0549143	1.09011
TCGA-XF-A9SP-01A-11R-A39I-07	0.206907	0	0.120307	0.137381	0	0.0252387	0	0.0182704	0.0144709	0.0025667	0	0.0468034	0.00220593	0.0152471	0.0534248	0.260278	0	0.0158689	0.0810287	0	0	0	0.002	0.414445	0.910254
TCGA-DK-A3IK-01A-32R-A21D-07	0	0.194851	0.0799765	0.122701	0	0.0589056	0	0.0413313	0	0.0143784	0	0.0357619	0	0.187537	0.122941	0.102773	0	0	0.038844	0	0	0	0.019	0.2394	0.993863
TCGA-C4-A0F6-01A-11R-A10U-07	0.0520892	0	0.0591478	0.17887	0	0.0405562	0	0	0	0.00145477	0	0.0170778	0	0.373294	0.0375749	0.18914	0.00691069	0.00911893	0.0347655	0	0	0	0.041	0.166523	1.03849
TCGA-CF-A7I0-01A-22R-A352-07	0.0900798	0	0.0167214	0.269956	0	0.134614	0.0725118	0.00399767	0.00416908	0	0	0.0478624	0.0170104	0	0.0291412	0.102706	0.0942649	0.012927	0.104038	0	0	0	0.263	0.0481961	1.0664
TCGA-FD-A3B6-01A-21R-A20F-07	0.0165257	0	0.0063925	0.191046	0	0.11543	0.126538	0.050576	0	0	0.0585837	0	0.00184364	0.139183	0.0815652	0.164629	0.0110499	0	0.0262448	0	0	0.0103928	0.016	0.249667	0.984482
TCGA-GU-A764-01A-11R-A352-07	0.00213346	0.0118465	0.0695874	0.0790928	0	0.146564	0.0987316	0.0305794	0	0	0	0.0889375	0.0517803	0.0835771	0.146903	0.114044	0.0364097	0	0.0398133	0	0	0	0.074	0.130126	1.0348
TCGA-GU-A42R-01A-11R-A23N-07	0	0.0143808	0.0239674	0.220939	0	0.00448203	0	0.0244483	0	0	0	0.0995933	0.0669245	0.0366597	0	0.151245	0.00175597	0.172718	0.160162	0	0.0227238	0	0.813	-0.0166618	1.08778
TCGA-DK-A6B6-01A-11R-A30C-07	0.0578784	0	0.115852	0.0386099	0	0.0496933	0.106317	0.0725563	0.0962776	0.165841	0.0127679	0	0	0.0360872	0.0579148	0.060353	0.0082588	0.0673243	0.0532076	0	0	0.0010611	0.009	0.300512	0.962833
TCGA-R3-A69X-01A-22R-A30C-07	0.118113	0	0	0.105577	0	0.252014	0.00422677	0.0328109	0.0210644	0	0	0.0267685	0.0661582	0	0.0521836	0.187698	0.079767	0	0.0517055	0	0	0.00191191	0.021	0.216269	0.993856
TCGA-5N-A9KM-01A-11R-A42T-07	0.0323118	0	0.051564	0.303306	0	0.139366	0.0463698	0.00296172	0	0	0	0.0346233	0.086512	0	0.0458701	0.184087	0.0101706	0.00450894	0.0583477	0	0	0	0.021	0.217374	0.99874
TCGA-FD-A6TD-01A-51R-A33J-07	0.0255847	0.0043792	0.000124545	0.134754	0	0.112004	0.0630248	0.0187905	0	0	0	0.0593964	0	0.127407	0.0869958	0.271797	0.0318487	0.0147732	0.0491207	0	0	0	0.107	0.102089	1.04548
TCGA-4Z-AA7M-01A-11R-A39I-07	0.070427	0	0.0168272	0.0990229	0.103435	0	0	0	0.0283706	0	0.0720874	0	0	0.37409	0.0748668	0.134028	0.021126	0	0	0.00571932	0	0	0.072	0.136529	1.05138
TCGA-ZF-AA56-01A-31R-A39I-07	0.0600467	0.0452858	0.064954	0.064235	0	0.215085	0.00297989	0.0406648	0.0105714	0	0.0178282	0	0.0392131	0	0.0340842	0.195115	0.0321727	0.0739969	0.0326924	0.0185526	0.00168772	0.0508344	0.009	0.298483	0.9579
TCGA-XF-A8HH-01A-11R-A38B-07	0.0631498	0	0.00872868	0.051985	0	0.062352	0	0.0513331	0.063859	0	0	0.0138489	0.00623829	0.224118	0.112947	0.179661	0.058001	0	0.100828	0	0.00295046	0	0.168	0.0761292	1.05685
TCGA-C4-A0EZ-01A-21R-A24X-07	0.00252605	0.0157363	0.0311036	0.105382	0	0.165521	0	0.0728133	0.0323976	0	0.0929317	0	0.0279873	0.329145	0.0246212	0.0529154	0.0174173	0.000727881	0.0287746	0	0	0	0.501	0.0124585	1.09761
TCGA-XF-AAML-01A-11R-A42T-07	0.0961767	0	0.0333703	0.216935	0	0.0636553	0.13437	0.0632163	0.0106314	0	0.0263764	0	0.0367542	0.065758	0.0253069	0.0503364	0.00832166	0.0484726	0	0.0778724	0.0308134	0.0116335	0.126	0.0950963	1.0438
TCGA-ZF-AA58-01A-12R-A42T-07	0.0208485	0	0.008131	0.110728	0	0.0909406	0.0917429	0.0189269	0.0230959	0	0.0389812	0	0	0.252371	0.109708	0.217519	0	0	0	0.0156095	0	0.00139832	0.008	0.311149	0.961267
TCGA-UY-A9PA-01A-11R-A38B-07	0	0	0.000907592	0.28238	0	0.133043	0.186535	0.0652518	0	0	0.0208476	0.00515392	0	0.0372772	0.0819207	0.0533297	0.0510808	0.0452499	0.0370228	0	0	0	0.202	0.0642865	1.07924
TCGA-G2-AA3F-01A-12R-A42T-07	0	0.0373538	0.0130636	0.0737827	0	0.0351946	0.0305318	0.0160445	0.0578074	0	0.11021	0	0	0.221014	0.112977	0.227584	0.0199476	0.00233606	0.042154	0	0	0	0.409	0.0231467	1.08501
TCGA-FJ-A871-01A-11R-A352-07	0.0405472	0	0.015338	0.140661	0.027691	0.0788469	0.149465	0	0	0	0.0629145	0	0	0.281532	0.019987	0.133534	0	0	0.0494839	0	0	0	0.033	0.179231	1.01558
TCGA-ZF-A9RN-01A-11R-A42T-07	0.00169057	0	0	0.377301	0	0.125461	0.137788	0.0538853	0.0233483	0	0.00478335	0.015341	0.00950499	0.0517638	0.104064	0.0596616	0	0	0.0354061	0	0	0	0.03	0.189738	1.03721
TCGA-GC-A3RB-01A-12R-A220-07	0.0123943	0	0.0136174	0.0837672	0	0.144308	0.0422305	0.107619	0	0	0	0.0466777	0.00217696	0.0648275	0.074287	0.107277	0.260575	0.0259028	0.0143382	0	0	0	0.15	0.0830218	1.04962
TCGA-UY-A9PF-01A-11R-A38B-07	0.148255	0	0	0.0761997	0	0.143766	0	0.0853419	0.0219831	0	0	0.0647122	0	0.043514	0.0801692	0.0808353	0.0414834	0.0878523	0.125888	0	0	0	0.069	0.140895	1.02645
TCGA-YC-A89H-01A-11R-A36F-07	0.137164	0	0.104078	0.0824708	0	0	0.0615165	0.0097345	0.00391773	0	0.00597545	0.0286642	0	0.312791	0.0630499	0.164751	0.0197528	0	0	0.00225094	0.00244417	0.00144005	0.003	0.372733	0.933766
TCGA-XF-AAMQ-01A-11R-A42T-07	0.120093	0	0.11021	0.208122	0	0.101238	0.0785074	0.0738836	0.0064176	0	0	0.010247	0.00276637	0	0.0678973	0.0744035	0.0621666	0.0482102	0.0356232	0	0.000213012	0	0.003	0.368037	0.932252
TCGA-FD-A3B4-01A-12R-A206-07	0.175886	0	0.0666645	0.0872523	0	0.147718	0.0340191	0.0377677	0	0	0.0298078	0	0	0.129215	0.11488	0.0929886	0	0.00583069	0.0741688	0	0	0.00380202	0.002	0.398894	0.916661
TCGA-DK-A1AB-01A-11R-A13Y-07	0.0157187	0	0.0273047	0.0540403	0	0.167257	0.0497732	0.0242482	0.0296547	0	0.0149603	0	0	0.158622	0.150598	0.106845	0.0317551	0.0526599	0.103579	0	0	0.0129847	0.011	0.27802	0.971893
TCGA-ZF-AA4N-01A-11R-A38B-07	0	0.00144676	0.00382161	0.152022	0	0.144916	0.110824	0.0231134	0.00181978	0	0.00672425	0.00781422	0.119711	0	0.115078	0.106034	0.157527	0	0	0.0397973	0.00935001	0	0.083	0.12085	1.03252
TCGA-BT-A20X-01A-11R-A16R-07	0.0128254	0	0.0796775	0.163247	0	0.0599013	0.178192	0.0222827	0.00224916	0	0.0567681	0	0.016336	0.110924	0.122935	0.095216	0.00560966	0.0467766	0.0263653	0	0	0.000694301	0.029	0.193567	1.007
TCGA-GV-A3JW-01A-11R-A20F-07	0.0517425	0.0605592	0.0381008	0.0854382	0.0860689	0	0	0	0.0201646	0	0.0653076	0	0	0.129713	0	0.22947	0.0465801	0.0683476	0.118507	0	0	0	0.894	-0.0240054	1.08038
TCGA-UY-A8OD-01A-11R-A36F-07	0.0884855	0	0	0.110596	0	0.115473	0.0034817	0.038793	0.0428832	0.0179447	0	0.0445478	0	0.334013	0.0651937	0.0591587	0	0	0.0794287	0	0	0	0.031	0.186742	1.01811
TCGA-2F-A9KT-01A-11R-A38B-07	0	0.00360038	0.0116318	0.0790485	0	0.149449	0	0.0682118	0	0	0.011444	0.0297987	0	0.190859	0.0695735	0.220335	0.00224131	0	0.010606	0	0.0213506	0.131851	0.266	0.0477377	1.07879
TCGA-ZF-AA5H-01A-11R-A39I-07	0.0446766	0	0.000588319	0.101911	0	0.160387	0.0742125	0.0111641	0	0	0.0485872	0.030095	0	0.263578	0.116782	0.143141	0.00264347	0.00223302	0	0	0	0	0.045	0.160719	1.03249
TCGA-XF-A9T2-01A-11R-A42T-07	0.00400478	6.2049e-05	0	0.0305735	0	0.0507921	0	0.0314313	0.033721	0.00304278	0	0.0909479	0	0.394583	0.00409497	0.147758	0.00784744	0	0.200158	0	0	0.000983455	0	0.657991	0.768125
TCGA-DK-A3WX-01A-22R-A22U-07	0.0293746	0	0.0149607	0.0809256	0	0.219964	0.0311366	0.0431898	0	0	0.0417304	0.0135002	0	0.125015	0.115937	0.046454	0.00789674	0	0	0.0794163	0	0.150499	0.032	0.183819	1.01899
TCGA-YF-AA3L-01A-11R-A38B-07	0	0.0976765	0.00123244	0.0186594	0	0.173666	0	0.0192757	0.0844996	0	0.0624832	0	0.0273599	0.00144788	0.0242923	0.20419	0.255703	0	0.0295138	0	0	0	0.38	0.0272453	1.06466
TCGA-BT-A2LA-01A-11R-A18C-07	0.165221	0	0	0.193425	0	0.0484846	0	0.101229	0	0	0	0.0493358	0.0247565	0.253339	0	0.0471118	0	0.00852739	0	0.100339	0.0082304	0	0.856	-0.0206212	1.10984
TCGA-4Z-AA87-01A-11R-A39I-07	0	0.0373903	0.0156989	0.216991	0	0	0.0944438	0.0413607	0.0462417	0	0.0301005	0	0.00654475	0.111959	0.0921698	0.0927255	0.213796	0	0	0	0.000578146	0	0.091	0.114149	1.0367
TCGA-BT-A2LB-01A-11R-A18C-07	0.0402303	0	0.0353437	0.146048	0	0.0361584	0.147278	0.0344989	0	0	0.0421858	0	0	0.0668909	0.122632	0.120575	0.0207558	0.112245	0.0139218	0	0	0.0612359	0.034	0.172384	1.01673
TCGA-XF-A8HB-01A-11R-A36F-07	0	0.0791256	0	0	0	0.195405	0	0.0830696	0.00168343	0	0.00627755	0.0210326	0.0402007	0	0.00193623	0.266378	0.0796623	0.186678	0.0385514	0	0	0	0.384	0.0269117	1.06725
TCGA-DK-A2I6-01A-12R-A18C-07	0	0.0471131	0.00405501	0.138483	0	0.261286	0.0526301	0.00449848	0	0	0.0544646	0	0.0195292	0.0749911	0.0252374	0.0749329	0.0109343	0.216866	0	0.0149789	0	0	0.102	0.10569	1.05457
TCGA-ZF-AA4X-01A-11R-A38B-07	0.0588422	0.0498131	0	0.0740546	0	0.00215182	0	0.0494311	0	0	0.0772591	0	0.0117449	0.126813	0	0.0790471	0	0.414755	0.0519232	0	0.00416494	0	0.816	-0.0169754	1.13038
TCGA-E7-A7PW-01A-11R-A352-07	0	0.183875	0.0124439	0.219409	0	0.128398	0	0.045313	0.0230512	0	0	0.0486389	0.0292468	0.114995	0.0723833	0.0197613	0.0239273	0.0489326	0	0.0255564	0.00406764	0	0.077	0.126454	1.04419
TCGA-4Z-AA7S-01A-11R-A39I-07	0.0369092	0.116607	0.00674626	0.0274058	0.00188515	0.103779	0	0.135339	0.00134105	0	0	0	0	0	0.00584428	0.163898	0.0495044	0.163265	0.170662	0	0	0.0168147	0.48	0.0145466	1.06636
TCGA-CF-A3MH-01A-11R-A20F-07	0	0.121342	0.0171849	0.080407	0.152453	0.0247931	0	0.038524	0	0.0491611	0	0	0.00429421	0	0.00688895	0.0962108	0.167892	0.174148	0	0.0468915	0.00632686	0.0134828	0.367	0.0291328	1.068
TCGA-DK-A6B2-01A-11R-A30C-07	0.156265	0	0.123037	0.0848141	0	0.0814122	0.0210904	0.0216618	0.0370357	0	0	0.0180649	0.00358905	0.0806385	0.118594	0.139106	0.0150108	0.0283134	0.0701573	0	0	0.00120876	0.001	0.477706	0.878238
TCGA-4Z-AA86-01A-11R-A39I-07	0.0150457	0	0.00287273	0.111296	0	0.226541	0.0739319	0.00187291	6.59328e-05	0	0.0910228	0	0	0.222537	0.0753025	0.108459	0	0	0	0.0710528	0	0	0.06	0.147319	1.03536
TCGA-BL-A0C8-01B-04R-A277-07	0	0	0.0080448	0	0	0.172116	0	0.044871	0	0	0.0117841	0	0	0	0	0.319519	0	0.19806	0.0177378	0	0.227867	0	0.952	-0.0322728	1.10352
TCGA-5N-A9KI-01A-31R-A42T-07	0.0120429	0.0772051	0.0170723	0.041916	0	0.128733	0	0.0359117	0.0246805	0	0	0.0272339	0	0.106675	0.0633637	0.250869	0.0127119	0.0833261	0.0566454	0	0	0.0616135	0.23	0.0568882	1.05605
TCGA-XF-A9SL-01A-11R-A39I-07	0.243161	0	0.0548641	0.1218	0	0.0679122	0.0374927	0.0102429	0.0614561	0	0	0.0293239	0.0348661	0.069818	0.0065949	0.135639	0	0.0113332	0.115496	0	0	0	0.001	0.489585	0.873159
TCGA-XF-AAN2-01A-11R-A42T-07	0	0	0.00260992	0.185342	0	0.124618	0.0834458	0.089582	0.00506944	0	0.0910566	0.0168915	0.00359263	0.0909534	0.103242	0.0995169	0	0.0738516	0.0283013	0	0	0.00192554	0.01	0.292262	0.972363
TCGA-CF-A9FL-01A-11R-A38B-07	0.0169321	0.0267797	0.0891946	0.103742	0	0.0861148	0.00353468	0.0750954	0.00448891	0	0	0	0.0150428	0.188285	0.0254336	0.134243	0.0358431	0.00219683	0.18619	0	0.0050942	0.00178887	0.279	0.0461629	1.05956
TCGA-CF-A9FM-01A-11R-A38B-07	0	0.000583323	0	0.0902019	0	0.141765	0	0.00532634	0.0868235	0	0	0.0863756	0.0151812	0.0373748	0.0424529	0.0950752	0.0953758	0.195453	0	0.068309	0	0.0397027	0.281	0.0443518	1.07834
TCGA-ZF-A9RD-01A-11R-A42T-07	0.0961466	0	0	0.133143	0	0.151546	0.125428	0.0430136	0	0	0	0.0317124	0.00727574	0.077376	0.119686	0.107119	0.0135912	0	0.093962	0	0	0	0.024	0.208762	0.998621
TCGA-G2-AA3D-01A-11R-A39I-07	0.184109	0.0809466	0.0488276	0.170672	0	0.0189876	0.0210698	0.029518	0.122309	0	0	0.0246707	0.00986613	0.00948883	0	0.0963855	0	0.133046	0.0454337	0	0	0.0046698	0.598	0.00267704	1.10003
TCGA-DK-A2I2-01A-11R-A180-07	0	0.0430328	0	0.0562833	0	0.162138	0.000728449	0	0.00220302	0	0.022189	0	0	0.186831	0.042065	0.121813	0.125973	0	0	0.186711	8.03419e-05	0.0499511	0.009	0.298451	0.965788
TCGA-FD-A62S-01A-11R-A30C-07	0.0139482	0.021523	0.0148603	0.0507688	0	0.242775	0.000378692	0	0.0243012	0	0	0.00993588	0	0.230569	0.0709451	0.129633	0.0960436	0.0266477	0.0676697	0	0	0	0.097	0.110703	1.04191
TCGA-MV-A51V-01A-11R-A26T-07	0.109904	0	0.0365712	0	0	0.359535	0	0.117121	0	0	0	0.0455043	0.0109933	0	0.0449072	0.114773	0	0.0765695	0	0.0841206	0	0	0.501	0.012441	1.09183
TCGA-E5-A2PC-01A-11R-A206-07	0	0	0.00603757	0.163808	0	0.128963	0.0804873	0.115641	0.0392885	0	0.0407555	0.0464321	0.0461631	0.0327173	0.124393	0.0598899	0.0710892	0	0.044334	0	0	0	0.083	0.119823	1.04999
TCGA-DK-A3X2-01A-11R-A22U-07	0	0.0320547	0	0.227759	0	0	0	0.0504847	0	0	0	0	0.014304	0.244594	0	0.199441	0	0.173243	0.0487186	0	0.000250192	0.00915106	0.517	0.0111076	1.09435
TCGA-GD-A76B-01A-11R-A32O-07	0.011862	0.00570293	0.0773761	0.141767	0	0.0421812	0.104342	0.0371639	0.187956	0	0	0.0290061	0.0152253	0.0156469	0.116385	0.0624413	0.131511	0.00925975	0	0.00912745	0.000685729	0.00236049	0.028	0.199221	1.00888
TCGA-GC-A6I1-01A-12R-A31N-07	0	0.0116653	0.042902	0.180524	0	0.0879769	0.116083	0.0167264	0.0306459	0	0.044694	0	0	0.230896	0.0722591	0.138707	0.000829854	0	0	0.0232246	0	0.00286542	0.074	0.131211	1.03705
TCGA-BL-A13J-01B-04R-A277-07	0.0492808	0	0.00644304	0	0	0.186925	0.0527767	0.0388242	0	0	0.0631633	0	0	0.0227137	0.0533273	0.299698	0	0.0955254	0.0404972	0	0.0908256	0	0.407	0.0234482	1.06403
TCGA-XF-A9SK-01A-11R-A42T-07	0.0106837	0	0.0449754	0.0488791	0	0.204002	0	0.019258	0.0854965	0	0	0.0359407	0.0673583	0.00274162	0.0802154	0.224936	0.028613	0.0845804	0.0602352	0	0	0.00208517	0.029	0.191819	1.00321
TCGA-DK-A1AD-01A-11R-A13Y-07	0.121123	0	0.00949929	0.240479	0	0	0.0858558	0.0257303	0.0629802	0.00332635	0	0	0.0255453	0.00902722	0.21579	0.128407	0.0250312	0.0336069	0	0	0.0135979	0	0.019	0.238954	1.00503
TCGA-K4-A5RI-01A-11R-A28M-07	0	0.0102758	0.00118392	0.00878647	0	0.08817	0	0.0494385	0.0156602	0	0.0678731	0.0863985	0.0469384	0.00320202	0.00298959	0.110218	0.231094	0.058774	0.199116	0	0.019882	0	0.022	0.215608	0.993275
TCGA-FD-A3SQ-01A-21R-A22U-07	0.276579	0	0.12223	0.0326347	0	0.0645753	0.00154932	0.0316557	0.0247431	0	0.023133	0.0156342	0	0.280331	0.0192545	0.0382904	0.0147653	0	0.0546249	0	0	0	0.001	0.444972	0.897602
TCGA-GV-A3QF-01A-31R-A22U-07	0	0.114416	0	0	0.148138	0	0.0154367	0	0	0	0.113783	0	0.0549366	0.0963034	0	0.000782712	0	0.213421	0	0.0216544	0.00501762	0.216111	0.308	0.0392453	1.08631
TCGA-G2-A3VY-01A-11R-A22U-07	0.116379	0	0.0611434	0.304876	0	0	0	0.0296582	0.00881348	0	0.0675895	0	0.0220479	0	0	0.0964935	0.0981536	0.183214	0	0.0116308	0	0	0.061	0.146356	1.03309
TCGA-XF-AAN8-01A-11R-A42T-07	0.046863	0	0.0134985	0.0647239	0	0.0806868	0.0539474	0	0.00557722	0	0	0.00697262	0.0196135	0.0360303	0.0192089	0.383939	0	0.00924633	0.130205	0	0	0.129487	0.003	0.374113	0.92787
TCGA-CU-A3QU-01A-11R-A22U-07	0	0.0362729	0.0113436	0.0176021	0	0.0901128	0	0.0148504	0.0238907	0	0.0507415	0	0.087303	0.351542	0	0.0606483	0.0102958	0.0731528	0	0.124004	0.0482399	0	0.494	0.0129286	1.10186
TCGA-DK-A6AW-01A-11R-A30C-07	0	0.0292453	0.0171366	0.145202	0	0.167162	0	0.043905	0.112062	0	0	0.125104	0.0233424	0.0631128	0	0.115199	0.00243355	0.105384	0.0489621	0	0	0.00174872	0.403	0.0241866	1.09307
TCGA-GC-A3BM-01A-11R-A22U-07	0.0064306	0.0335998	0	0.165817	0	0.179858	0.0136668	0.169168	0	0	0	0.00465305	0.0114359	0	0.214432	0.0641557	0.121797	0.00703086	0.00795544	0	0	0	0.126	0.0939918	1.08282
TCGA-GV-A6ZA-01A-12R-A33J-07	0.0624844	0	0.0442652	0.175263	0	0.114654	0.00962184	0.135649	0.0411615	0	0.090228	0.0104767	0.0114214	0.0694782	0.0799605	0.0356409	0.0432819	0.0287809	0.0476336	0	0	0	0.033	0.183419	1.01927
TCGA-G2-A2EJ-01A-11R-A180-07	0.0064299	0	0.00301934	0.119422	0	0	0.143856	0.059029	0	0	0.0252513	0.0448027	0	0.242007	0.114255	0.0617105	0	0.138421	0	0.0397382	0	0.00205767	0.015	0.253501	0.993673
TCGA-FD-A43N-01A-11R-A23W-07	0.262241	0	0.123359	0.0859208	0	0.057217	0	0	0.00360742	0	0	0	0	0.169985	0.0526029	0.0984815	0	0.052478	0	0.0856186	0.00848903	0	0.001	0.449102	0.894272
TCGA-XF-AAMJ-01A-11R-A42T-07	0.165818	0	0.148549	0.0821055	0	0.014812	0.0227468	0.0313455	0.0308792	0	0.00238326	0.0207504	0	0.219643	0.0912777	0.0882092	0.0044445	0	0.0685909	0	0	0.00844443	0.002	0.391429	0.922927
TCGA-GU-A763-01A-11R-A32O-07	0	0.0889704	0	0.179392	0	0.104124	0	0.203721	0	0.0435356	0	0.0655052	0	0	0.0328229	0.0855445	0.107887	0.0652994	0.0231983	0	0	0	0.188	0.0670291	1.07495
TCGA-G2-A2EC-01A-11R-A180-07	0.0434799	0	0.104096	0.0523223	0	0.333182	0.008162	0.0318111	0.132829	0	0	0.0467443	0.00311533	0	0.0139257	0.0624143	0.0206489	0.0574761	0.089794	0	0	0	0.021	0.223922	1.00538
TCGA-FD-A3B7-01A-31R-A20F-07	0.0237044	0.000953299	0.00625378	0.309617	0	0.0125047	0.15454	0	0	0	0.0327213	0	0	0.168803	0.107669	0.123405	0.0112058	0.0021357	0	0.0274082	0	0.0190786	0.046	0.159754	1.02858
TCGA-FD-A5C0-01A-11R-A28M-07	0.0626869	0	0	0.179351	0	0.202742	0	0.00321756	0	0	0	0	0.0443256	0.0807487	0.0371494	0.208587	0	0.0307395	0.0322388	0.102301	0	0.0159122	0.094	0.112976	1.0391
TCGA-FD-A5BS-01A-21R-A26T-07	1.03131e-05	0.0218461	0.0624435	0.243516	0	0.11802	0.0563702	0.0303584	0.0455874	0	0.0501349	0.0369595	0.0145503	0.110747	0.116642	0.0760394	0	0	0.0160695	0	0	0.000704787	0.044	0.161851	1.03418
TCGA-BT-A20W-01A-21R-A14Y-07	0.151505	0	0.00476665	0.248024	0	0.100143	0.0173607	0.0838344	0.10158	0	0	0.0222313	0.0264225	0.0227484	0.0596156	0.0823095	0.0109212	0.0208225	0.0439215	0	0.00379359	0	0.098	0.107445	1.05909
TCGA-UY-A78O-01A-12R-A33J-07	0.177947	0	0.137241	0.0162513	0.0125394	0.0212725	0	0.104642	0	0.00128542	0	0.0295018	0	0.233305	0.0197748	0.0549414	0.0440616	0.0966245	0.0506122	0	0	0	0.003	0.374165	0.931182
TCGA-FD-A3B5-01A-11R-A20F-07	0	0	0.000907582	0.060229	0	0.220054	0	0.0823507	0	0	0	0.00775321	0	0.316516	0.0509049	0.139026	0	0.105133	0	0.00690647	0	0.010219	0.169	0.0753916	1.07983
TCGA-BL-A0C8-01A-11R-A10U-07	0.0112405	0	0	0.0361345	0	0.151577	0	0	0.00682467	0	0.0435527	0	0.0769998	0.0328961	0	0.412251	0	0.165621	0.0572614	0	0	0.00564087	0.666	-0.0034833	1.09111
TCGA-BT-A42C-01A-11R-A23N-07	0.178648	0	0.0256943	0.117567	0	0.0446587	0	0.0627093	0.0943673	0	0.0370858	0	0.000291412	0	0.0207382	0	0.0515762	0.191619	0	0.138135	0.020977	0.0159335	0.094	0.112608	1.0487
TCGA-CF-A8HX-01A-11R-A36F-07	0	0.110044	0.0332079	0	0.0259418	0.23462	0	0	0.00619093	0	0.0381341	7.54795e-05	0.00777288	0	0	0.16028	0.161316	0.217697	0	0	0	0.00472038	0.572	0.00588574	1.08113
TCGA-PQ-A6FI-01A-11R-A31N-07	0.019079	0	0.00509845	0.151106	0	0.118499	0.104864	0.0683852	0	0	0.027878	0.0474933	0.0404408	0.0685235	0.0189248	0.0555119	0	0.218999	0.0549318	0	0	0.000264575	0.094	0.112357	1.04609
TCGA-FJ-A3Z7-01A-12R-A23N-07	0.179831	0	0.0301662	0.19825	0	0.16701	0.0510112	0.0346936	0	0	0.0279178	0	0.00742551	0.0752354	0.132181	0.0607117	0	0.00857247	0	0.0269948	0	0	0.059	0.149225	1.03964
TCGA-XF-A8HC-01A-11R-A36F-07	0	0.065814	0	0.0945059	0	0.235666	0	0.0444464	0	0.0691933	0	0	0	0.221209	0	0.0361027	0	0.0200085	0.193226	0	0	0.0198286	0.829	-0.0181553	1.09785
TCGA-ZF-AA4W-01A-12R-A38B-07	0	0.0248037	0.00121526	0.056786	0	0.0637528	0.0870018	0.0557152	0	0	0	0.140031	0	0.156163	0.150738	0	0	0.14606	0.0647728	0	0	0.0529611	0.061	0.14661	1.0519
TCGA-LC-A66R-01A-41R-A30C-07	0	0.012022	0.03562	0.184163	0	0.123468	0.154767	0.0313038	0.00432291	0	0.0994513	0	0.00431591	0.0465053	0.0776573	0.13702	0	0.0603539	0.0242346	0	0	0.00479439	0.143	0.0859048	1.05576
TCGA-E7-A8O7-01A-11R-A36F-07	0.0390057	0	0.0651187	0.113999	0	0.0523257	0	0.0486735	0.109008	0.00688896	0	0	0.00603994	0.0115219	0.00561983	0.0757064	0.187558	0.134231	0	0.104207	0	0.0400981	0.043	0.163393	1.01334
TCGA-UY-A9PB-01A-11R-A38B-07	0.0117069	0	0.0645936	0.152939	0	0.151574	0.0964056	0.0357612	0.0250212	0	0.0534453	0	0	0.13987	0.0983634	0.13084	0.00667977	0	0.0328003	0	0	0	0.068	0.141693	1.02906
TCGA-FD-A6TI-01A-11R-A32O-07	0.0879252	0	0.0179855	0.174302	0	0.226652	0.0160248	0.0535565	0	0	0	0.0322375	0.0129211	0.00661123	0.038374	0.143002	0.0147862	0.0477128	0.069377	0.0527097	0	0.00582305	0.632	-0.000199112	1.08753
TCGA-G2-AA3B-01A-11R-A39I-07	0.0483656	0	0.0152366	0.137613	0	0	0.279979	0.142146	0.0787341	0	0.0850068	0	0.000818116	0.00443121	0.0382895	0.0516911	0.0105736	0.0952284	0.0118727	0	0	1.41741e-05	0.126	0.0943795	1.06218
TCGA-K4-A54R-01A-11R-A26T-07	0	0	0.00505624	0.233652	0	0.074006	0.138851	0.00800931	0	0	0.17676	0	0	0.0655992	0.146469	0.103709	0.00460418	0.00733765	0.0359461	0	0	0	0.001	0.439613	0.899913
TCGA-DK-A1AA-01A-11R-A13Y-07	0	0.0325644	0	0	0	0.224737	0	0.0204878	0.027886	0.0137649	0	0.0619749	0.0183644	0	0.0312238	0.117645	0.222359	0.101666	0.11764	0	0	0.00968645	0.323	0.0363537	1.05909
TCGA-CU-A5W6-01A-11R-A28M-07	0.056751	0	0.137159	0.0546384	0	0.124613	0	0.0380317	0.0066933	0	0	0.0654505	0.00986733	0.0884954	0.0201308	0.0726984	0.0149936	0.198386	0.0704258	0	0	0.0416657	0.012	0.267678	0.975401
TCGA-DK-AA6R-01A-11R-A42T-07	0	0.0062661	0	0	0	0.0455787	0.0902245	0.138944	0.00976766	0	0.137756	0.0199351	0.00332332	0.107209	0.158255	0.0189024	0.0839273	0.177826	0	0	0.0020848	0	0.034	0.17655	1.03854
TCGA-BT-A3PH-01A-11R-A220-07	0	0.0536998	0	0.0640192	0	0.144582	0	0.0598987	0	0	0	0.00791059	0	0.10245	0	0.145251	0	0.188441	0.198299	0	0.00397682	0.0314723	0.446	0.0190797	1.07059
TCGA-BL-A13I-01B-04R-A277-07	0.0149293	0	0.00168868	0.00251147	0	0.184695	0.00521467	0.00763614	0	0	0	0.00311995	0.0334099	0	0.0454625	0.649459	0	0	0	0.0413372	0.0105365	0	0.001	0.433746	0.904169
TCGA-G2-A3IB-01A-11R-A20F-07	0	0.00503682	0.00198039	0.106324	0	0.214046	0.0287234	0	0	0	0.0160965	0.0430521	0	0.326356	0.0288235	0.0982152	0.0277454	0.086249	0.0159047	0	0.00144686	0	0.178	0.070786	1.07716
TCGA-2F-A9KP-01A-11R-A38B-07	0.172751	0.0685017	0.00761149	0.0975004	0	0.0655264	0.0584437	0.0157197	0.0126393	0	0.047883	0	0.0322299	0	0	0.114006	0	0.227826	0.0166093	0.014313	0	0.0484398	0.473	0.0151597	1.08102
TCGA-DK-A3IT-01A-31R-A20F-07	0.242946	0	0.201633	0.0641225	0	0.129626	0.00871488	0	0	0	0.0118673	0	0.0227157	0.0422009	0.0387214	0.120795	0	0.027826	0.0888314	0	0	0	0.001	0.501663	0.864754
TCGA-FD-A43P-01A-31R-A23W-07	0.06084	0	0.0344886	0.273262	0	0	0.159561	0.0446553	0.0624146	0.0356712	0	0.0142258	0	0.11388	0.132247	0.0498881	0.00134485	0.000818491	0.0167031	0	0	0	0.021	0.227455	1.00249
TCGA-DK-A3IV-01A-22R-A21D-07	0.0903085	0.0157445	0	0.0526188	0	0.264844	0	0.0748646	0.100993	0.00565732	0	0.0515146	0	0.0631742	0.116439	0.0522299	0.0165397	0.064753	0.0303183	0	0	0	0.008	0.307028	0.966269
TCGA-2F-A9KW-01A-11R-A38B-07	0.116691	0	0.0139845	0.00873858	0	0.034681	0.00825277	0	0.0411289	0	0.00349327	0	0	0.329224	0.0273238	0.177062	0	0.120561	0.0111637	0	0.0503733	0.0573231	0.069	0.139511	1.05073
TCGA-GU-A762-01A-11R-A33J-07	0.0306958	0	0.00838306	0.253466	0	0.0251604	0.184819	0.0274568	0.0314382	0	0.0881893	0	0.0113429	0.0203537	0.107537	0.152625	0.0115226	0.0136423	0.0333672	0	0	0	0.017	0.243842	0.990697
TCGA-XF-AAME-01A-12R-A42T-07	0.129137	0	0.0646358	0.0622207	0	0.172097	0.0383532	0	0.0436491	0.0311551	0	0.00444762	0	0.109803	0.019522	0.173186	0.0257978	0.0177275	0.0828815	0	0.00612303	0.0192634	0.008	0.316938	0.950721
TCGA-XF-AAN0-01A-11R-A42T-07	0.13	0	0.131815	0.13092	0	0.128687	0.0310333	0.0637346	0.00153453	0	0	0.0201356	0.00541518	0.0241873	0.102189	0.142914	0.00195679	0	0.0453459	0	0	0.0401305	0.003	0.385693	0.923836
TCGA-FD-A62P-01A-32R-A30C-07	0.0155626	0.00950495	0	0.184233	0	0	0.12986	0.0268453	0.0041054	0	0.0216177	0	0	0.327801	0.0635096	0.154198	0.0103337	0	0.0403193	0	0	0.0121082	0.002	0.412527	0.911779
TCGA-CF-A47V-01A-11R-A23W-07	0.00689829	0.0212395	0.0108941	0.303678	0	0.0135327	0.031522	0.0499642	0.0216387	0	0	0.0267711	0.0352969	0	0.0450296	0.103486	0.16131	0.0855163	0.0832225	0	0	0	0.303	0.0406423	1.06458
TCGA-XF-A9SI-01A-11R-A39I-07	0.0826871	0	0.0253686	0.243542	0	0.200926	0.117979	0.0400109	0.0295602	0	0.0150147	0	0.0059541	0.04157	0.112824	0.0584072	0	0.00153431	0.0228097	0	0	0.00181272	0.059	0.149831	1.04336
TCGA-GU-A42Q-01A-11R-A23W-07	0	0.0259466	0.00619498	0.0762858	0	0.0999512	0	0.0117001	0	0	0.0695372	0.00421107	0	0.562011	0.0441951	0	0.0872488	0	0	0.00226625	0.0104519	0	0.034	0.177205	1.06306
TCGA-BT-A42F-01A-11R-A23W-07	0.123225	0	0.0649229	0.151081	0	0.0390674	0.0745117	0.0547654	0.0144052	0	0.0149544	0.0166846	0	0.197782	0.04542	0.0933295	0.000474303	0.00346967	0	0.0958698	0	0.010037	0.008	0.313105	0.955808
TCGA-ZF-A9RF-01A-11R-A38B-07	0.045665	0	0.0123224	0.419662	0	0.0125883	0.0810658	0.0454455	0.00865603	0	0	0.0236119	0.0105935	0.0237436	0.0751833	0.222341	0	0	0	0.0191211	0	0	0.01	0.28773	0.975868
TCGA-KQ-A41N-01A-11R-A33J-07	0	0.151173	0.041661	0.0602111	0	0.0897482	0	0.0542183	0.0150619	0	0.0399119	0	0.00704446	0.134808	0	0.162105	0.0317832	0.134551	0.058846	0.0188773	0	0	0.577	0.00540789	1.07202
TCGA-GD-A3OQ-01A-32R-A220-07	0.059158	0	0.00780474	0.0639186	0	0.0540588	0.0575755	0.0984015	0	0	0	0.0438139	0.00494178	0.122253	0.0645241	0.111562	0.0312641	0.127955	0	0.0920317	0.036083	0.0246549	0.243	0.0532308	1.06161
TCGA-BT-A20U-01A-11R-A14Y-07	0	0.012958	0.0115847	0.0885177	0	0.105076	0.0194149	0.08802	0.0236392	0	0.0292898	0	0	0.265152	0.0786898	0.189762	0.0295595	0.0119811	0.0351342	0	0	0.011221	0.097	0.110443	1.04961
TCGA-XF-A9SW-01A-11R-A42T-07	0.0748719	0	0.0247173	0.0454626	0	0.133874	0	0.0112212	0.0136141	0	0	0.0375702	0.0211998	0	0.00711096	0.394008	0.0101041	0.0852874	0.128369	0	0	0.0125897	0.033	0.183399	1.00538
TCGA-FD-A3B3-01A-12R-A206-07	0.0493458	0	0.118214	0.13876	0	0.110449	0.0766735	0.0676129	0	0	0.0185716	0.0224387	0	0.11552	0.126129	0.0896396	0.0108955	0.00345135	0.0456146	0	0	0.00668473	0.01	0.283486	0.969837
TCGA-ZF-A9RC-01A-11R-A38B-07	0.0495817	0.0193662	0.0143165	0.0598965	0.0083498	0.0108901	0.0744402	0.00377489	0	0	0.0238337	0	0	0.30738	0.0440532	0.159483	0	0.0220039	0.173195	0	0	0.029436	0.106	0.103008	1.05071
TCGA-E7-A6MD-01A-41R-A352-07	0.193632	0	0.0353646	0.0992518	0	0.270474	0.0136066	0.0357066	0.040615	0	0	0.00291793	0.0117231	0.0421304	0.0466421	0.109004	0.0392359	0.0159437	0.0437513	0	0	0	0.003	0.366883	0.932599
TCGA-E5-A4TZ-01A-11R-A31N-07	0.113967	0	0.0122343	0.0629365	0	0	0	0.113857	0.00712761	0	0.0263576	0	0	0.424376	0	0.0883048	0	0.10111	0.0393548	0	0	0.0103751	0.087	0.116289	1.06369
TCGA-ZF-A9R4-01A-11R-A38B-07	0.00965838	0.00408907	0.00486454	0.155489	0	0.126377	0.14416	0.0662008	0	0.0330889	0.00796602	0.0701239	0	0.033337	0.102388	0.149616	0.0199854	0.00370778	0.0689482	0	0	0	0.17	0.0738935	1.06459
TCGA-GV-A3QH-01A-11R-A220-07	0	0.0615974	0	0.0907205	0	0.0812952	0	0.0405891	0	0	0.0334403	0.00868734	0.0577333	0.179441	0.0107658	0.0923716	0	0.343359	0	0	0	0	0.905	-0.0250923	1.12538
TCGA-BT-A0YX-01A-11R-A10U-07	0.0261729	0	0.00258274	0.200101	0	0.193234	0.0937649	0.0669657	0	0	0	0.0431653	0.0203748	0.0169918	0.0683622	0.109806	0.0350056	0.0354842	0.0657557	0	0	0.0222332	0.107	0.102023	1.05002
TCGA-FT-A3EE-01A-11R-A206-07	0.134221	0.0742821	0	0.0607134	0	0.0722623	0.00844636	0.0558108	0.00590106	0	0	0	0.000419491	0.0288417	0	0.138436	0.0809267	0.235919	0.0645115	0	0	0.0393082	0.016	0.247592	0.982508
TCGA-ZF-A9RL-01A-11R-A38B-07	0	0.0374404	0.0167	0.263805	0.166658	0.0117506	0	0.0197773	0	0	0	0.0313489	0.00225245	0	0.0750542	0.0469238	0.286526	0.041763	0	0	0	0	0.471	0.015505	1.09331
TCGA-ZF-A9R9-01A-11R-A38B-07	0.122721	0	0.0832047	0.0680985	0	0.18993	0.00479813	0	0.0616578	0.00304108	0	0.0152317	0.00883031	0.12599	0.109393	0.160587	0.00672534	0	0.0315792	0.00549548	0	0.00271702	0.011	0.274441	0.973424
TCGA-DK-A1A7-01A-11R-A13Y-07	0.244106	0	0.103786	0.123248	0	0.142969	0.00840599	0.0674632	0.0560142	0	0	0.0432261	0	0.0337278	0.0107101	0.0499173	0.0147739	0.0338769	0.0677748	0	0	0	0.003	0.368949	0.937373
TCGA-FD-A3SR-01A-11R-A22U-07	0.0130886	0	0.00145092	0.14953	0	0.225387	0	0.0241732	0.0756432	0	0	0.0152676	0.00665518	0.0724881	0.182463	0.115654	0.0153151	0.00236714	0.100517	0	0	0	0.04	0.16795	1.03373
TCGA-GU-AATP-01A-11R-A39I-07	0.097021	0	0.0155054	0.0812742	0	0.0982087	0.0253808	0.0477954	0.0311993	0	0.00559464	0	0	0.25713	0.0357018	0.177194	0	0.0881114	0.0394311	0	0	0.000452161	0.037	0.170475	1.01916
TCGA-DK-AA6X-01A-12R-A42T-07	0.0396088	0.0380558	0	0.079207	0	0.129597	0.010758	0.0105697	0.0628789	0	0	0.0136746	0.0140665	0.1013	0.0628778	0.0881085	0.190913	0.00338025	0.146226	0	0	0.00877768	0.161	0.0793974	1.03981
TCGA-XF-A9T3-01A-11R-A42T-07	0.199461	0	0.0222674	0.0580276	0	0.116603	0.0437337	0.0287427	0.0105898	0	0.0051085	0.0170971	0	0.230718	0.0893584	0.129897	0	0	0.0483949	0	0	0	0.002	0.405368	0.913851
TCGA-PQ-A6FN-01A-11R-A31N-07	0.122033	0	0.155265	0.158706	0	0	0.0529469	0.0217578	0.0154545	0	0.00108405	0.00066971	0	0.27121	0.0887836	0.072342	0.0343387	0	0.00460683	0	0	0.000801504	0.002	0.408371	0.915007
TCGA-CF-A1HR-01A-11R-A13Y-07	0.184269	0	0.114112	0.201086	0	0.109132	0.000425581	0.000817749	0.00699411	0	0	0.0492061	0.0189559	0.00591236	0.0331102	0.0952203	0.00461364	0.0821441	0.092901	0	0	0.00109959	0.004	0.358793	0.938047
TCGA-E7-A3X6-01A-12R-A22U-07	0	0	0.0140091	0.18625	0	0	0.106751	0.0908534	0.0326365	0.0360748	0	0.0327654	0	0.0450077	0.150917	0.0925348	0.0956614	0.0293597	0.0810514	0	0	0.00612806	0.011	0.278364	0.973106
TCGA-DK-A3WW-01A-22R-A23N-07	0.00997967	0	0.00560937	0.302418	0	0	0.202148	0.04869	0.0115548	0	0.0814271	0	0	0.0205166	0.143516	0.113271	0.0287112	0.0106977	0.0147029	0	0	0.00675687	0.003	0.361036	0.940234
TCGA-XF-AAMY-01A-11R-A42T-07	0	0.0290756	0.0146503	0.0549731	0	0.000140208	0.0259298	0.00471239	0.014881	0	0.026814	0	0.0440139	0.330571	0.0281208	0.165729	0	0.0414536	0.0555948	0	0.152508	0.0108327	0.078	0.124924	1.05122
TCGA-K4-A3WS-01A-11R-A22U-07	0.203097	0	0.0667646	0.113259	0	0.0142384	0.0469869	0.0143858	0.0790474	0	0.0077036	0.00943637	0.00886216	0.0474887	0.179772	0.108203	0.0341466	0.0147063	0.0519026	0	0	0	0.001	0.457249	0.888752
TCGA-GC-A3YS-01A-11R-A23N-07	0	0.0128512	0.00840059	0.0217901	0	0.273123	0	0.0230734	0.0324077	0	0.0188409	0.0561301	0	0.251409	0.0147149	0.135822	0.0793584	0.0405372	0.0313391	0	0	0.000201948	0.015	0.254078	0.985749
TCGA-DK-A1AF-01A-11R-A13Y-07	0.0272887	0	0	0.128056	0	0.139096	0.0465761	0.0334253	0.008984	0	0	0.0231718	0.00637948	0.296908	0.0885592	0.105173	0.00929862	0	0	0.0608287	0.00554395	0.0207121	0.034	0.17698	1.02512
TCGA-LT-A5Z6-01A-11R-A28M-07	0.202485	0	0.11206	0.205601	0	0.0127963	0.00908116	0.0671175	0.0340185	0	0	0.0543335	0	0.139685	0.0259185	0.0901581	0	0	0.0467461	0	0	0	0.008	0.319167	0.959641
TCGA-GC-A4ZW-01A-11R-A26T-07	0.107607	0	0.0815546	0.146111	0	0.0870275	0.0874264	0.0728263	0	0	0	0.0524752	0	0.113275	0.033946	0.104936	0.0319499	0.00726609	0.0735998	0	0	0	0.076	0.126938	1.02984
TCGA-K4-A4AB-01B-12R-A28M-07	0.00956919	0.0315505	0	0.0367598	0	0.280747	0.0314962	0.0360188	0.0147159	0	0.00958766	0.0296861	0.00252477	0.0228399	0.0117668	0.169293	0.143581	0.0930322	0.0579177	0	0.00991068	0.00900345	0.09	0.114742	1.03155
TCGA-DK-AA74-01A-11R-A39I-07	0.0206952	0	0.00369509	0.134606	0	0.0499166	0.0346549	0.070358	0.0254	0	0	0.0330991	0	0.110516	0.151784	0.229294	0.0587859	0	0.0579345	0	0	0.0192595	0.001	0.447583	0.893436
TCGA-G2-A2EO-01A-11R-A180-07	0.0257383	0	0.0295429	0.23727	0	0.0631449	0.190889	0.02541	0	0	0	0.0750194	0.0157054	0.0953139	0.0475758	0.0957575	0.00711106	0.00458239	0.0869391	0	0	0	0.07	0.137827	1.03161
TCGA-DK-A1AG-01A-11R-A13Y-07	0.0138085	0	0.0134604	0.0950923	0	0.376929	0.00807209	0	0.0142666	0.0504056	0	0.0781904	0.0286699	0.0533426	0	0.0700592	0.00910761	0.0599924	0.034869	0	0	0.0937345	0.205	0.0638856	1.08007
TCGA-GV-A3JZ-01A-11R-A21D-07	0.117562	0	0.0492696	0.0886039	0	0.0910212	0.0463658	0.0283639	0.0111454	0	0	0.0232303	0	0.194174	0.0718256	0.198106	0.0640783	0	0.0158632	0	0	0.000391178	0.02	0.237154	0.987746
TCGA-XF-A9SV-01A-21R-A42T-07	0.04407	0	0.0128132	0.130138	0	0	0.00355524	0.0313208	0.0204438	0.00628189	0	0.0143114	0	0.466711	0.0431907	0.163102	0	0	0.0640623	0	0	0	0.112	0.100815	1.08601
TCGA-UY-A78K-01A-11R-A33J-07	0.0872316	0.0979152	0.110241	0.150816	0	0.0888159	0.0448023	0.0423467	0.0848608	0	0.0231412	0	0.000774457	0.0825113	0.0564541	0.103849	0.015627	0	0.0106138	0	0	0	0.001	0.453339	0.89053
TCGA-FD-A6TH-01A-11R-A32O-07	0.136921	0	0.00699483	0.0397075	0	0.127831	0	0.0944886	0	0.00155276	0	0.0404794	0	0.257968	0.0988415	0.165444	0	0	0.0261293	0	0	0.00364215	0.01	0.281901	0.973113
TCGA-DK-AA6W-01A-12R-A39I-07	0.0084277	0.00292482	0	0.0501836	0	0.125263	0.0016774	0	0.0375999	0	0	0.0278771	0	0.126617	0.0804068	0.129646	0.393084	0	0	0.00426628	0.0120266	0	0.015	0.251297	0.99024
TCGA-CF-A3MG-01A-11R-A20F-07	0.0268673	0	0	0.0961983	0	0.28228	0	0	0	0	0	0.0204826	0.0492257	0.0947789	0	0.01101	0.129094	0.0753967	0.209913	0	0.00475375	0	0.943	-0.0302273	1.08956
TCGA-DK-A3X1-01A-12R-A22U-07	0.0112063	0	0.0348577	0.0945434	0	0.122971	0.0796515	0.0216477	0.0145459	0	0.0494557	0	0	0.185304	0.102784	0.181204	0.0204039	0.0314779	0	0.0499476	0	0	0.168	0.0769854	1.05701
TCGA-DK-A1A6-01A-11R-A13Y-07	0	0	0.00118647	0.309888	0	0	0.119908	0.0701608	0.00518008	0.00113586	0.0114452	0	0.00059808	0	0	0.167485	0	0.265746	0	0.0342009	0	0.0130658	0.019	0.239439	0.997555
TCGA-XF-AAMG-01A-11R-A42T-07	0	0.104252	0	0.0145466	0	0.316683	0	0	0.0154826	0	0.0369012	0	0.0513189	0.0943044	0.0305041	0.26244	0.0057671	0.0180667	0	0.0415842	0	0.00815006	0.113	0.0999336	1.0425
TCGA-E7-A541-01A-11R-A26T-07	0	0.00874776	0.00697713	0.389595	0	0.0576076	0.11098	0.0350703	0.0291381	0	0.00437337	0.0176462	0.00749576	0.0137955	0.051293	0.0999056	0.0957699	0.0137623	0.0378529	0	0.0141531	0.00583648	0.052	0.154537	1.03607
TCGA-XF-A8HE-01A-11R-A36F-07	0.0728916	0	0.0271454	0.206278	0	0.110589	0.0961242	0.064763	0.00648146	0	0.03754	0.0162463	0	0.0610894	0.107631	0.0481118	0.000328627	0.0161773	0.0444663	0	0	0.0841366	0.006	0.331215	0.949296
TCGA-DK-AA6Q-01A-11R-A39I-07	0	0	0	0.366388	0	0	0.14434	0.0814206	0.0148702	0	0.0317814	0.00433893	0.0272339	0.00638671	0.122397	0.0384211	0.0928756	0	0.0695457	0	0	0	0.001	0.445817	0.89493
TCGA-UY-A78N-01A-12R-A33J-07	0.0438515	0	0.0109475	0.24754	0	0.0375439	0	0.116404	0.0152407	0	0	0	0.0819203	0	0.00261205	0.122929	0.162073	0.072865	0	0.00200385	0.0792573	0.00481187	0.262	0.048437	1.06016
TCGA-DK-AA75-01A-11R-A39I-07	0.0354979	0.0722433	0.00392408	0.120733	0	0.122541	0	0.0141083	0	0.08055	0	0.0195685	0.0326055	0.205221	0.0616134	0	0.0600413	0	0.144587	0	0	0.0267658	0.712	-0.00808636	1.08168
TCGA-ZF-AA5P-01A-11R-A39I-07	0.34319	0	0.128374	0.0932811	0	0.0752823	0	0.0336077	0	0	0	0.030872	0.00240375	0.0048882	0.130878	0.0676363	0	0.0407841	0.0397927	0.00900974	0	0	0.001	0.466776	0.890311
TCGA-GC-A3WC-01A-31R-A22U-07	0.0340395	0.0314563	0.0179456	0.154382	0	0.0579836	0.133862	0.052484	0.0247214	0	0.00879923	0	0	0.0983273	0.136696	0.100476	0.0993966	0	0.0478314	0	0	0.0015985	0.02	0.237494	0.985156
TCGA-K4-A4AC-01A-21R-A26T-07	0	0.00133021	0.00379148	0.0660636	0	0.212438	0.08393	0	0	0	0.0600669	0	0	0.217806	0.108101	0.229346	0.0104162	0	0.000845689	0.00439659	0	0.00146807	0.01	0.282533	0.97455
TCGA-FD-A3SL-01A-21R-A22U-07	0.0605274	0	0	0.0615155	0	0.106919	0	0.0317112	0	0	0	0.0143283	0	0.209382	0.143511	0.228283	0.0376564	0	0.106165	0	0	0	0.024	0.211021	1.00588
TCGA-K4-A5RH-01A-11R-A30C-07	0.00309477	0	0.000815955	0.45282	0	0	0.17763	0.0223462	0	0	0.0209161	0	0.010755	0.00287751	0.0846648	0.213342	0	0	0.0107377	0	0	0	0.004	0.348051	0.948214
TCGA-FD-A5C1-01A-11R-A28M-07	0.0139583	0	0.0282542	0.176427	0	0.10317	0.12051	0.0453309	0	0	0.00440901	0	0.0102089	0.0988447	0.0903807	0.181471	0.0168989	0.0822347	0.0207602	0	0	0.0071421	0.019	0.238731	0.986629
TCGA-BL-A13J-01A-11R-A277-07	0.0483088	0	0.01844	0.0510966	0.0201905	0.080931	0.031475	0	0	0	0.0308781	0	0	0.286822	0.079027	0.203921	0	0.0614931	0.0488429	0	0.0385745	0	0.735	-0.0101438	1.10259
TCGA-XF-AAN7-01A-11R-A42T-07	0.0594562	0	0.00886964	0.0764418	0	0.264261	0.031589	0.0180025	0	0	0	0.0318755	0.0104462	0.146772	0.0782983	0.210075	0	0	0.0639121	0	0	0	0.106	0.103857	1.04256
TCGA-2F-A9KO-01A-11R-A38B-07	0.0880637	0	0.0275374	0.231054	0	0.16158	0.0795698	0.0541976	0.00910799	0	0	0.0501391	0	0.0378379	0.0711218	0.094781	0.0265377	0.0128728	0.0555993	0	0	0	0.021	0.217776	1.00252
TCGA-DK-A3IM-01A-11R-A20F-07	0	0.00506094	0	0.0655005	0	0.0945908	0	0.0844373	0	0	0	0	0	0.583785	0.0481936	0.0361168	0	0.0168709	0	0.0444207	0	0.0210237	0.013	0.26134	1.0247
TCGA-FD-A3SS-01A-12R-A22U-07	0.0714109	0	0.0205234	0.0311009	0	0.16714	0	0.0393061	0	0	0.0555496	0	0	0.141001	0.0695037	0.184094	0	0.174045	0	0.00669604	0.0396296	0	0.049	0.156986	1.02552
TCGA-UY-A9PE-01A-11R-A38B-07	0.141539	0	0.121466	0.0385078	0	0	0	0.0650715	0.0158045	0	0	0.0271347	0	0.318021	0.110129	0.0857766	0	0	0.0765499	0	0	0	0.009	0.305158	0.968866
TCGA-GV-A40E-01A-12R-A23N-07	0	0.00186904	0.00188614	0.145431	0	0.0854089	0.115033	0.0121784	0	0	0.0666033	0	0.00860453	0.151739	0.0113832	0.121745	0	0.183328	0	0.0728838	0	0.0219075	0.072	0.135179	1.0344
TCGA-BT-A2LD-01A-12R-A20F-07	0.015488	0	0.0899952	0.130068	0	0.0968304	0.0469289	0.0865747	0.0187766	0	0	0.0144361	0	0.0812265	0.14204	0.228416	0	0.00423248	0.0425826	0	0	0.00240431	0.037	0.169671	1.01922
TCGA-UY-A9PD-01A-11R-A38B-07	0.040197	0	0.157185	0.0239536	0	0	0	0.0322217	0.0324493	0	0.0127363	0	0	0.510098	0.0700108	0.102336	0	0	0.0188122	0	0	0	0.022	0.215857	1.04318
TCGA-DK-A3IQ-01A-31R-A32Y-07	0.045786	0	0.00518565	0.0180269	0	0.317356	0	0	0	0	0.0187807	0.00583318	0.0224332	0.151003	0	0.271981	0	0.0138545	0.12976	0	0	0	0.077	0.126672	1.03402
TCGA-E7-A4XJ-01A-11R-A26T-07	0	0.130441	0.0776921	0.0664568	0	0.0573743	0	0.0281641	0.0952143	0	0	0.0767524	0.0191962	0.0201791	0	0.168272	0.106222	0.11643	0.0345621	0.00304431	0	0	0.619	0.00125839	1.07593
TCGA-XF-A9T6-01A-11R-A42T-07	0	0.00134663	0.000512459	0.148675	0	0	0.0663986	0.0403577	0.0171941	0	0	0.0450091	0	0.130518	0.0431167	0.243269	0.093454	0.129675	0.0357148	0	0	0.00475861	0.073	0.133656	1.0334
TCGA-FD-A43Y-01A-21R-A26T-07	0	0.000557428	0.00266828	0.0929486	0	0.067339	0.0423105	0.0575591	0.0139621	0	0.0139747	0.0367796	0.0222203	0.16982	0.154998	0.1256	0.112758	0.0163924	0.0701117	0	0	0	0.02	0.233559	0.993394
TCGA-S5-AA26-01A-11R-A38B-07	0	0.0911619	0.00550043	0.0203083	0	0.160663	0	0.0546946	0.00232475	0	0	0.113466	0.00060384	0.0103235	0.00209178	0.347287	0.075087	0.0329139	0.0624505	0	0.0211239	0	0.919	-0.0263742	1.0897
TCGA-YC-A9TC-01A-22R-A39I-07	0.0105208	0.0241652	0	0.12199	0	0.0614214	0	0.0197747	0.0359621	0	0	0.132375	0	0.121821	0.00698209	0.216936	0	0.0326994	0	0.20977	0.00558269	0	0.168	0.0772087	1.08401
TCGA-GV-A3QG-01A-11R-A220-07	0.222327	0	0.0561195	0.142791	0	0.0807516	0.037719	0.053409	0.0309726	0	0	0.0253429	0.00512013	0.163619	0.0807178	0.0701388	0.00125621	0	0.0297153	0	0	0	0.001	0.459485	0.887355
TCGA-K4-A6FZ-01A-11R-A31N-07	0.0480034	0	0.0054111	0.116233	0	0.20213	0.00151818	0.0248935	0.00519179	0	0	0	0.00707006	0.182226	0.0746929	0.0996599	0	0.0706575	0	0.118414	0	0.0438995	0.033	0.178228	1.0181
TCGA-KQ-A41R-01A-21R-A352-07	0	0.0264302	0.00183145	0.0481369	0	0.15832	0	0.0426929	0.0730072	0	0	0.0596284	0	0.0975299	0.0612261	0.186683	0	0.0965986	0.140954	0	0	0.00696168	0.697	-0.00651599	1.08227
TCGA-DK-AA6M-01A-11R-A39I-07	0.00713897	0	0.0018403	0.04038	0	0.207457	0.00208188	7.9422e-05	0.0152046	0	0	0.0850777	0.0317037	0	0.0681744	0.18945	0.235612	0	0.10902	0	0	0.00678026	0.008	0.30679	0.955685
TCGA-ZF-AA52-01A-12R-A39I-07	0.0278665	0	0	0.0829243	0	0.0714044	0.012292	0.00915187	0.00389476	0	0	0.0486129	0	0.355188	0.0375948	0.251916	0.0335431	0	0	0.0470521	0	0.0185586	0.114	0.0997907	1.07876
TCGA-K4-A5RJ-01A-11R-A28M-07	0.00265396	0	0.000887788	0.30895	0	0	0.0909088	0.0376895	0.039276	0.00869066	0	0.000185433	0.00346362	0.0259593	0.0869843	0.299907	0.0788266	0	0.0133849	0	0	0.00223278	0.001	0.445347	0.894566
TCGA-HQ-A5ND-01A-11R-A26T-07	0	0.00775463	0.00281472	0.207276	0	0.151006	0.126703	0	0	0	0.0472764	0.0155527	0	0.0686326	0.205605	0.0401558	0	0.0708515	0.0546684	0	0	0.00170396	0.038	0.169053	1.04704
TCGA-BT-A3PK-01A-21R-A220-07	0.0202149	0	0.00255365	0.0345326	0	0.0793307	0.0675186	0.0276104	0.0111635	0	0.021322	0	0	0.211842	0.0962187	0.0918939	0	0.163902	0	0.113814	0	0.058084	0.02	0.23198	1.00243
TCGA-FD-A3N6-01A-11R-A21D-07	0	0.00609053	0.00474816	0.206336	0	0.0300901	0.0116377	0.122942	0	0	0.00816681	0.00284254	0.0226788	0.256679	0.268957	0	0.0271884	0	0	0.00859596	0.0230465	0	0.006	0.33281	0.971119
TCGA-UY-A78P-01A-12R-A36F-07	0.0127079	0.00376365	0.00269864	0.117504	0	0.0749269	0.0654955	0.0752925	0	0	0.0159882	0	0	0.308462	0.0997435	0.120528	0.0269634	0	0.0621242	0	0	0.0138013	0.005	0.337236	0.948081
TCGA-BT-A20Q-01A-11R-A14Y-07	0.042286	0	0.146041	0.125917	0	0.114798	0.0636818	0.0647471	0.040009	0	0	0.0185427	0.0134128	0.00226071	0.090601	0.100711	0.117259	0.0152536	0.0444782	0	0	0	0.008	0.319209	0.952305
TCGA-CU-A0YR-01A-12R-A10U-07	0.0548034	0	0.017796	0.0967312	0	0.064264	0.0160031	0.0260373	0.0102906	0	0	0.0511108	0	0.338895	0.063617	0.176496	0.0326889	0.0429531	0	0.000929459	0.00100826	0.00637603	0.028	0.199152	1.01983
TCGA-SY-A9G5-01A-11R-A38B-07	0.0331289	0	0.0366268	0.160632	0	0.0813934	0.0209363	0.143044	0	0.0552802	0	0.0286347	0	0.0446051	0	0.170416	2.22017e-05	0.176202	0.0490788	0	0	0	0.008	0.318266	0.953732
TCGA-4Z-AA84-01A-11R-A39I-07	0.151382	0	0.141781	0.0577555	0	0.0869845	0	0.062889	0.0131885	0	0	0.0128093	0	0.311353	0.0402158	0.0865908	0	0.0174403	0	0.0158217	0	0.00178949	0.008	0.313086	0.966165
TCGA-4Z-AA7Q-01A-11R-A39I-07	0.0156229	0	0.00471643	0.281791	0	0.116263	0.110341	0.0411499	0.0407152	0	0	0.00533138	0.00861925	0.0488835	0.160845	0.0903688	0	0.0307782	0.0445743	0	0	0	0.083	0.120418	1.06007
TCGA-FD-A5BT-01A-11R-A26T-07	0.0427706	0	0.00944532	0.227839	0	0.0390695	0.0910459	0.0858388	0.0246179	0	0	0.0238944	0.0152893	0.0571848	0.106726	0.238962	0.0104301	0	0.0268859	0	0	0	0.003	0.370416	0.930006
TCGA-CF-A27C-01A-11R-A16R-07	0	0	0.0387537	0.29237	0	0.152766	0	0.0467514	0.107654	0	0	0.0664992	0.018447	0	0	0.0253837	0.0972576	0.112574	0.0321653	0	0	0.00937704	0.694	-0.00624841	1.12266
TCGA-E7-A6MF-01A-12R-A32O-07	0.0125188	0.0247442	0	0.141085	0	0.256846	0	0.0824494	0.0296218	0	0	0.0288372	0.0981984	0	0.0282093	0.156335	0.0703597	0.0319369	0.0267572	0	0	0.0121016	0.185	0.0673914	1.06265
TCGA-FD-A6TF-01A-52R-A32O-07	0.1658	0	0	0.137293	0	0.0981111	0	0.0150042	0.00831399	0	0	0.0171206	0.0178298	0.0922351	0.0462738	0.243016	0.0119827	0	0.14702	0	0	0	0.013	0.263501	0.973499
TCGA-XF-AAMR-01A-31R-A42T-07	0.0216796	0	0.00162862	0.0183718	0	0.210732	0	0	0.00608856	0	0	0.0523517	0.0101483	0	0.00261642	0.349217	0.130846	0.00316546	0.175003	0	0.00144465	0.0167068	0.034	0.177443	1.01031
TCGA-XF-A8HF-01A-11R-A36F-07	0.0353435	0.010845	0.00271735	0.112365	0	0.114401	0.00378148	0	0.103169	0	0.0543971	0	0.0259254	0.00829239	0.0938808	0.3191	0.0103566	0.0203151	0	0.069513	0.0129645	0.00263265	0.084	0.119184	1.03814
TCGA-ZF-AA4U-01A-11R-A38B-07	0	0.00215481	0	0.134111	0	0.0920316	0.0516963	0.113826	0.0288886	0.00259534	0	0	0.0530658	0	0.167877	0.0983124	0.178959	0.015174	0.0608331	0	0.000475248	0	0.462	0.0164564	1.08484
TCGA-E7-A97Q-01A-11R-A38B-07	0.0822133	0	0.0703392	0.225422	0	0.0019817	0.0831069	0.0128819	0.0221726	0	0	0.0538797	0.00863612	0.00371054	0.150235	0.146522	0.0094273	0.00883328	0.120638	0	0	0	0.207	0.0628492	1.06591
TCGA-ZF-A9R0-01A-11R-A38B-07	0.0191112	0.0115208	0.00604337	0.0952638	0	0.0473522	0.0850967	0.0467179	0.0300601	0	0.0420701	0	0	0.311453	0.164052	0.0915306	0.0276495	0	0.0220784	0	0	0	0.509	0.0119129	1.10475
TCGA-FD-A43S-01A-21R-A23W-07	0.107439	0.068919	0.151838	0.257071	0	0.0141084	0.0254224	0.0370693	0.0795717	0	0	0.0139936	0.0134657	0.0234498	0.0123182	0.140372	0	0.00767986	0.0450984	0	0	0.00218314	0.001	0.453417	0.89123
TCGA-XF-A8HG-01A-11R-A36F-07	0	0.078238	0	0.0531852	0.0108669	0.036784	0	0	0	0	0.0432787	0	0.059774	0.0282725	0.00238931	0.317681	0.228574	0.0925218	0.0431881	0	0	0.00524616	0.395	0.0255307	1.07578
TCGA-K4-A83P-01A-11R-A352-07	0.17868	0.0793816	0.090678	0.114316	0	0.113889	0.0325599	0.0567756	0.0357277	0	0	0.0359102	0.00393146	0.102399	0.0636325	0.0615847	0.0151004	0	0	0.00945173	0	0.00598242	0.001	0.468463	0.882721
TCGA-GD-A2C5-01A-12R-A180-07	0	0.0116142	0.0219378	0.0202818	0	0.208154	0	0	0.0285242	0	0.0167965	0.0092308	0.0191466	0.0628643	0.0308822	0.172188	0.113726	0.104549	0.116945	0	0.0425858	0.0205741	0.433	0.0208306	1.06028
TCGA-XF-AAMX-01A-11R-A42T-07	0	0.0329135	0.0286252	0.0813192	0	0.0600568	0.0439745	0.0983177	0.0345173	0	0	0	0	0.159681	0.0831137	0.328582	0	0	0.0488996	0	0	0	0.099	0.106786	1.04539
TCGA-DK-A1AE-01A-11R-A13Y-07	0	0	0.00854735	0.0577904	0	0.242872	0.0848538	0.124261	0	0	0.0563967	0.0593396	0.0111085	0.0485129	0.0742188	0.0333758	0.108427	0.0198547	0.0704404	0	0	0	0.126	0.094971	1.05431
TCGA-FJ-A3ZE-01A-11R-A23N-07	0	0.142575	0.0387224	0.221122	0	0.133638	0	0	0.00265842	0	0	0.0127086	0	0.131845	0	0.00270945	0	0.143874	0.157033	0	0.0057722	0.00734256	0.974	-0.0396651	1.10093
TCGA-DK-A2I1-01A-11R-A180-07	0.084694	0	0.0757011	0.15018	0	0.0141434	0.0264816	0.00423488	0.0673375	0	0	0.0542912	0.00720305	0.112858	0.137911	0.137369	0.0553808	0	0.0701559	0	0	0.00205865	0.016	0.246294	0.98435
TCGA-DK-A6B0-01A-11R-A31N-07	0	0.00167572	0.000191852	0.0530015	0	0.199538	0	0.025257	0.00397235	0	0	0.0896651	0.12022	0.00624685	0.0176011	0.354963	0.00389501	0.0182434	0.102759	0	0.00276916	0	0.617	0.00143682	1.08294
TCGA-FD-A5BR-01A-11R-A26T-07	0.161538	0	0.128393	0.0960029	0	0.134194	0.0697605	0.0492937	0.082311	0	0	0	0	0.0972421	0	0.0944338	0.0114425	0.0314355	0.0342424	0	0	0.00971129	0.003	0.370341	0.932014
TCGA-GD-A3OP-01A-21R-A220-07	0.115975	0	0.00849528	0.0909946	0	0.188602	0.0060963	0.068714	0.00173887	0	0	0.046951	0.00599079	0	0.109737	0.171621	0.0477881	0	0.137295	0	0	0	0.355	0.0314497	1.06794
TCGA-KQ-A41P-01A-12R-A33J-07	0.109315	0	0.00627716	0.0467346	0	0.0859193	0	0.00906542	0.0211101	0	0	0.0351249	0	0.408711	0.0462464	0.155452	0	0.0132517	0.0627928	0	0	0	0.001	0.475826	0.879456
TCGA-UY-A9PH-01A-11R-A38B-07	0.0167425	0	0.0605954	0.1871	0	0.055111	0.129856	0.0248519	0	0	0	0.0661945	0.0198443	0.0175944	0.103562	0.193961	0.0201506	0.0152757	0.083804	0	0	0.00535715	0.028	0.200339	1.00075
TCGA-FD-A5BY-01A-31R-A28M-07	0.0106557	0	0.000966766	0.0404104	0	0.156345	0	0.0103303	0.0129972	0.016049	0	0.0523604	0	0.250212	0.0597988	0.135727	0.0868008	0.000159984	0.157081	0	0	0.0101056	0.006	0.329245	0.949113
TCGA-K4-A3WU-01B-11R-A23N-07	0.248203	0.0085421	0.0369454	0.058564	0	0.281621	0.0299054	0	0.0331335	0	0	0.0143252	0	0.144973	0.00859072	0.0619809	0.015587	0.0136933	0.0392125	0	0	0.00472341	0.002	0.392449	0.921686
TCGA-FD-A3SJ-01A-12R-A22U-07	0.147613	0	0.0199992	0.0284746	0	0.125856	0	0.0224382	0.041973	0	0.023525	0	0.00844568	0.143077	0.101085	0.145956	0.063934	0	0.127623	0	0	0	0.034	0.177321	1.00767
TCGA-E7-A519-01A-11R-A26T-07	0	0.00903848	0.0917956	0.102121	0	0.159771	0.00473204	0	0.126152	0	0.0956925	0	0.0632343	0.175677	0	0.061341	0.00091344	0.0938258	0.0146935	0	0	0.00101207	0.013	0.262481	0.978591
TCGA-DK-A3IU-01A-11R-A20F-07	0.148745	0	0.0164622	0.185972	0	0.147339	0.106065	0.00476995	0.0381788	0	0	0.00649289	0	0.107166	0.100447	0.08757	0	0	0.0353739	0	0	0.0154193	0.001	0.483845	0.875766
TCGA-XF-A9T0-01A-11R-A39I-07	0.0324611	0	0.195983	0.173776	0	0	0.0834234	0.0251021	0.0123111	0	0.0029928	0.0134092	0.00343129	0.191608	0.0804434	0.11689	0.0239025	0	0.0319815	0	0.00640615	0.00587838	0.004	0.350191	0.941806
TCGA-YF-AA3M-01A-11R-A42T-07	0	0.0228797	0.0285178	0.111532	0	0	0.0365566	0.0348842	0.0315549	0	0	0.0278384	0	0.146963	0	0.11836	0.057292	0.135907	0.196946	0	0.019017	0.031752	0.211	0.0615441	1.04975
TCGA-4Z-AA7Y-01A-11R-A39I-07	0	0.0111742	0	0.0884648	0	0.201727	0	0.0579878	0	0	0	0.123854	0.0479759	0.0743012	0	0.12117	0.0568313	0.169317	0.0402732	0	0	0.00692358	0.634	-0.000419994	1.09147
TCGA-KQ-A41Q-01A-11R-A33J-07	0	0.0911308	0.0136684	0.0723454	0.116525	0	0.00174441	0	0.0287651	0	0.0733104	0	0.050514	0.163509	0	0.0339454	0	0.213359	0	0.118431	0.0227514	0	0.15	0.0831265	1.05393
TCGA-FD-A3SP-01A-31R-A22U-07	0.0326154	0	0.00624505	0.0678668	0	0.207525	0.0144684	0	0.0086522	0	0.0317166	0	0	0.323738	0.0667475	0.164846	0.0460488	0	0	0.0255245	0	0.00400599	0.012	0.270625	0.983809
TCGA-GC-A6I3-01A-11R-A31N-07	0.027755	0	0.164389	0.202893	0	0.0375465	0.0322088	0.0636389	0.0401544	0	0	0	0.000207153	0.166394	0.0675062	0.117149	0.00314209	0.0359112	0.0411044	0	0	0	0.009	0.304318	0.962064
TCGA-4Z-AA80-01A-11R-A39I-07	0.16756	0	0.0865489	0.181665	0	0	0.0241061	0.0835498	0.0528706	0	0.0573369	0.000993649	0	0.0134574	0.112472	0.0975432	0.0186353	0.0815294	0.0108835	0	0	0.0108479	0.02	0.227653	1.00241
TCGA-G2-A3IE-01A-11R-A20F-07	0	0.102117	0	0.113377	0	0.086533	0	0.0235085	0.0119829	0	0.0311482	0	0.0147519	0	0	0.282484	0	0.257601	0	0.0572925	0.0164249	0.00277881	0.066	0.142972	1.03029
TCGA-CF-A9FF-01A-11R-A38B-07	0.401173	0	0.0493861	0.105665	0	0.0560237	0.00141997	0.0617799	0.0706436	0	0	0.0320049	0.000517352	0.0443559	0.0365681	0.0416607	0	0.0391475	0.059654	0	0	0	0.021	0.22289	1.02579
TCGA-XF-A9ST-01A-11R-A42T-07	0.240984	0	0.0284653	0.0132786	0	0.0459113	0	0.0784953	0.0148114	0	0.0472972	0	0	0.380107	0.0167308	0.101727	0	0.0086168	0	0.0235758	0	0	0.069	0.139395	1.05482
TCGA-DK-A6B5-01A-11R-A31N-07	0	0.0089279	0.0138747	0.114354	0	0.0307595	0.00601536	0.169626	0	0	0	0	0.0139506	0.131862	0.0810012	0.117575	0.155845	0.0541026	0.0937401	0	0.00699582	0.00137103	0.178	0.0713696	1.05029
TCGA-GC-A3RC-01A-11R-A22U-07	0.00911901	0	0.00250625	0.104435	0	0.236546	0.00109511	0.0308721	0	0	0.0191465	0.0274587	0	0.274335	0.0437692	0.184455	0.0255321	0.0331157	0.00761382	0	0	0	0.012	0.268513	0.984001
TCGA-GV-A3QK-01B-11R-A23N-07	0.0141237	0.0160329	0	0.195448	0	0.0688771	0.12277	0.110919	0.0310681	0	0	0.012897	0	0.094112	0.0192977	0.0675588	0.024968	0.176138	0.0457891	0	0	0	0.311	0.0386633	1.075
TCGA-CF-A1HS-01A-11R-A13Y-07	0	0.0544282	0	0.0743747	0	0.151931	0.00346213	0.0391406	0	0	0	0	0.00174282	0.144597	0.0315712	0.162286	0.203074	0.0498609	0	0.0803434	0	0.00318743	0.021	0.225855	0.992503
TCGA-DK-AA71-01A-31R-A39I-07	0.00854601	0	0.00979342	0.266966	0	0	0.106792	0.0520386	0	0	0	0.0418534	0.00857515	0.164508	0.115123	0.153472	0	0.0072758	0.0624391	0	0.00261744	0	0.669	-0.00380456	1.09431
TCGA-KQ-A41O-01A-12R-A352-07	0	0	0.0640363	0.587792	0	0	0	0	0	0	0.0553369	0	0.00817423	0	0	0.125768	0	0.158893	0	0	0	0	0.434	0.0204522	1.13487
TCGA-BL-A13I-01A-11R-A277-07	0.0108705	0	0	0.0560401	0	0.132214	0.0122974	0.00269043	0.0297162	0	0.0187332	0	0.0248907	0.0928494	0.0272351	0.511162	0.00403838	0	0.0619417	0.0105782	0	0.0047424	0	0.513889	0.858738
TCGA-E7-A677-01A-11R-A30C-07	0	0.0383702	0.000759683	0.161643	0	0	0.0414042	0.0192853	0.151853	0	0	0.015125	0.0156811	0.0659061	0.040638	0.0027616	0.174907	0.136643	0.135023	0	0	0	0.15	0.0830861	1.04602
TCGA-DK-A6B1-01A-12R-A30C-07	0.000468953	0	0.00219388	0.123409	0	0.257023	0	0.0154729	0.0369013	0	0	0	0.109174	0.0954451	0	0.0770204	0.0195174	0.144029	0.114106	0	0.00523992	0	0.767	-0.0132125	1.08696
TCGA-CF-A5U8-01A-11R-A28M-07	0.0639908	0	0.151854	0.358149	0	0.0139047	0	0	0.00109214	0	0	0.0924365	0	0.0567357	0.0298649	0.0753654	0.0270692	0.0162899	0.053136	0	0	0.0601115	0.413	0.0227473	1.10064
TCGA-GU-AATO-01A-11R-A39I-07	0	0.0188235	0.120713	0.151829	0	0.0673021	0.0981267	0.0779949	0.0286955	0	0	0.0174803	0.0288121	0.0775967	0.0892635	0.13067	0.00538242	0	0.050963	0	0	0.0363483	0.017	0.244055	0.982399
TCGA-CF-A9FH-01A-11R-A38B-07	0	0	0.00264932	0.0680748	0.108559	0	0	0.0600005	0.014528	0	0	0.0495291	0.0243768	0	0.0239665	0.0837096	0	0.511	0.041072	0	0.0125349	0	0.065	0.144728	1.08812
TCGA-FD-A6TG-01A-11R-A32O-07	0.0788682	0	0.104706	0.124034	0	0.0081265	0	0.0888684	0.0126546	0.00425678	0	0.0522033	0.0138223	0.070889	0.0874919	0.157853	0.0662218	0	0.130003	0	0	0	0.008	0.310102	0.953948
TCGA-4Z-AA7O-01A-31R-A39I-07	0.0651426	0	0.0456046	0.302409	0	0.123886	0	0.0993415	0	0	0	0.0873558	0.0189686	0	0.0390539	0.0583006	0.0270297	0.0884521	0.0327836	0	0	0.0116728	0.032	0.184587	1.0302
TCGA-GV-A3QI-01A-11R-A220-07	0.0637515	0	0	0	0.002035	0.310378	0	0	0	0	0.0969815	0	0.00602448	0.138637	0.00963288	0.192194	0.0280549	0.0497815	0.102529	0	0	0	0.614	0.00160427	1.07641
TCGA-DK-A6AV-01A-12R-A30C-07	0.228355	0	0.0142909	0.204007	0	0.0857678	0	0.116972	0.0112635	0	0	0.00310774	0.0226151	0.0706444	0.0536853	0.0642184	0	0.091937	0	0.0250091	0.00812567	0	0.009	0.2972	0.968236
TCGA-DK-A1A3-01A-11R-A13Y-07	0.144208	0	0.0756013	0.086616	0	0.120159	0.0332509	0.0541644	0.0241539	0	0	0.0344675	0.0241641	0.0598193	0.0389475	0.117822	0.0377182	0.061238	0.0876707	0	0	0	0.006	0.334138	0.943645
TCGA-GD-A6C6-01A-21R-A31N-07	0	0.031295	0.0107377	0.17431	0	0	0	0.049801	0.054828	0	0	0.0750963	0.0112862	0.135969	0	0.213812	0	0.152491	0.0880177	0	0	0.00235608	0.169	0.0758233	1.05383
TCGA-GC-A3RD-01A-12R-A22U-07	0	0.0190687	0	0.0288423	0	0.056494	0	0.0244847	0.00825444	0	0.0706814	0	0	0.431172	0.00194229	0.08439	0	0	0	0.239232	0.0249022	0.0105358	0.073	0.131413	1.08897
TCGA-BT-A20R-01A-12R-A16R-07	0.073778	0	0.00834697	0.0200481	0	0.0574257	0	0	0.00109414	0	0	0.0305773	0	0.652001	0.0277302	0.082341	0	0	0.0466576	0	0	0	0	0.529118	0.857121

## Sheet: S5
Table S5: Tumor Microenvironment
ID	StromalScore	ImmuneScore	ESTIMATEScore
TCGA-2F-A9KO-01A-11R-A38B-07	-114.754	1490.75	1375.99
TCGA-2F-A9KP-01A-11R-A38B-07	-1630.63	-674.194	-2304.82
TCGA-2F-A9KQ-01A-11R-A38B-07	-1210.75	-567.435	-1778.19
TCGA-2F-A9KR-01A-11R-A38B-07	-1435.12	-210.88	-1646
TCGA-2F-A9KT-01A-11R-A38B-07	-936.774	-92.6058	-1029.38
TCGA-2F-A9KW-01A-11R-A38B-07	-18.8384	357.681	338.843
TCGA-4Z-AA7M-01A-11R-A39I-07	-1044.07	-147.9	-1191.98
TCGA-4Z-AA7N-01A-11R-A39I-07	826.303	2591.45	3417.76
TCGA-4Z-AA7O-01A-31R-A39I-07	-613.507	655.126	41.6197
TCGA-4Z-AA7Q-01A-11R-A39I-07	-495.606	1804	1308.4
TCGA-4Z-AA7R-01A-11R-A39I-07	-948.698	-654.908	-1603.61
TCGA-4Z-AA7S-01A-11R-A39I-07	-1368.72	-597.178	-1965.9
TCGA-4Z-AA7W-01A-11R-A39I-07	-58.4118	2475.47	2417.06
TCGA-4Z-AA7Y-01A-11R-A39I-07	-1716.56	-470.629	-2187.19
TCGA-4Z-AA80-01A-11R-A39I-07	-1708.05	-462.83	-2170.88
TCGA-4Z-AA81-01A-11R-A39I-07	-1264.41	811.527	-452.878
TCGA-4Z-AA82-01A-11R-A39I-07	-176.629	334.788	158.159
TCGA-4Z-AA83-01A-11R-A39I-07	-833.781	469.588	-364.193
TCGA-4Z-AA84-01A-11R-A39I-07	-1002.55	-335.878	-1338.43
TCGA-4Z-AA86-01A-11R-A39I-07	649.033	1865.05	2514.09
TCGA-4Z-AA87-01A-11R-A39I-07	-806.493	704.332	-102.16
TCGA-4Z-AA89-01A-11R-A39I-07	-2158.29	-57.7931	-2216.09
TCGA-5N-A9KI-01A-31R-A42T-07	-7.61896	747.177	739.558
TCGA-5N-A9KM-01A-11R-A42T-07	-65.2996	881.091	815.792
TCGA-BL-A0C8-01A-11R-A10U-07	-625.201	-211.674	-836.875
TCGA-BL-A13I-01A-11R-A13Y-07	745.797	2226.71	2972.51
TCGA-BL-A13J-01A-11R-A277-07	344.381	-42.565	301.816
TCGA-BL-A3JM-01A-12R-A21D-07	-569.675	-173.373	-743.048
TCGA-BL-A5ZZ-01A-31R-A30C-07	935.83	1253.65	2189.48
TCGA-BT-A0S7-01A-11R-A10U-07	-464.777	-67.8765	-532.654
TCGA-BT-A0YX-01A-11R-A10U-07	-517.229	956.506	439.277
TCGA-BT-A20J-01A-11R-A14Y-07	-325.973	1766.76	1440.78
TCGA-BT-A20N-01A-11R-A14Y-07	-1019.45	-670.939	-1690.39
TCGA-BT-A20O-01A-21R-A14Y-07	1047.32	3086.72	4134.04
TCGA-BT-A20P-01A-11R-A14Y-07	-1490.13	-373.796	-1863.93
TCGA-BT-A20Q-01A-11R-A14Y-07	415.792	1057.27	1473.06
TCGA-BT-A20R-01A-12R-A16R-07	856.174	598.028	1454.2
TCGA-BT-A20T-01A-11R-A14Y-07	-43.549	782.713	739.164
TCGA-BT-A20U-01A-11R-A14Y-07	-334.645	200.369	-134.276
TCGA-BT-A20V-01A-11R-A14Y-07	-1647.91	475.648	-1172.26
TCGA-BT-A20W-01A-21R-A14Y-07	-601.658	609.619	7.96081
TCGA-BT-A20X-01A-11R-A16R-07	-223.948	459.802	235.854
TCGA-BT-A2LA-01A-11R-A18C-07	-1390.28	-1428.58	-2818.87
TCGA-BT-A2LB-01A-11R-A18C-07	231.693	1020.59	1252.28
TCGA-BT-A2LD-01A-12R-A20F-07	-602.039	222.21	-379.829
TCGA-BT-A3PH-01A-11R-A220-07	-992.096	-376.762	-1368.86
TCGA-BT-A3PJ-01A-21R-A220-07	-627.123	1041.81	414.685
TCGA-BT-A3PK-01A-21R-A220-07	306.163	1002.17	1308.33
TCGA-BT-A42C-01A-11R-A23N-07	-1729.02	-438.73	-2167.75
TCGA-BT-A42E-01A-11R-A23W-07	-496.34	1699.17	1202.83
TCGA-BT-A42F-01A-11R-A23W-07	-202.524	2064.31	1861.79
TCGA-C4-A0EZ-01A-21R-A24X-07	-1288.91	-1110.19	-2399.1
TCGA-C4-A0F0-01A-12R-A10U-07	-175.337	855.421	680.084
TCGA-C4-A0F1-01A-11R-A034-07	-368.223	321.679	-46.5436
TCGA-C4-A0F6-01A-11R-A10U-07	-373.917	113.835	-260.082
TCGA-C4-A0F7-01A-11R-A084-07	-943.004	-441.072	-1384.08
TCGA-CF-A1HR-01A-11R-A13Y-07	-800.927	394.754	-406.173
TCGA-CF-A1HS-01A-11R-A13Y-07	-625.482	621.174	-4.3085
TCGA-CF-A27C-01A-11R-A16R-07	-2154.78	-413.556	-2568.33
TCGA-CF-A3MF-01A-12R-A21D-07	-1290.98	-264.899	-1555.88
TCGA-CF-A3MG-01A-11R-A20F-07	-2140.71	-594.645	-2735.36
TCGA-CF-A3MH-01A-11R-A20F-07	-1948.4	-105.08	-2053.48
TCGA-CF-A3MI-01A-11R-A20F-07	-1024.22	347.571	-676.646
TCGA-CF-A47S-01A-11R-A23W-07	-1481.41	267.163	-1214.24
TCGA-CF-A47T-01A-11R-A23W-07	-1292.58	-517.354	-1809.93
TCGA-CF-A47V-01A-11R-A23W-07	-830.478	397.553	-432.925
TCGA-CF-A47W-01A-11R-A23W-07	-1628.42	-364.794	-1993.21
TCGA-CF-A47X-01A-31R-A23W-07	-1772.24	-602.429	-2374.67
TCGA-CF-A47Y-01A-11R-A23W-07	-1624.68	-376.218	-2000.9
TCGA-CF-A5U8-01A-11R-A28M-07	-1750.6	-455.535	-2206.13
TCGA-CF-A5UA-01A-11R-A28M-07	-1544.77	-217.346	-1762.12
TCGA-CF-A7I0-01A-22R-A352-07	-471.129	101.193	-369.937
TCGA-CF-A8HX-01A-11R-A36F-07	-1588.32	-473.645	-2061.96
TCGA-CF-A8HY-01A-11R-A36F-07	-1612.83	-88.5171	-1701.35
TCGA-CF-A9FF-01A-11R-A38B-07	-625.083	464.871	-160.212
TCGA-CF-A9FH-01A-11R-A38B-07	-1919.52	-249.269	-2168.79
TCGA-CF-A9FL-01A-11R-A38B-07	-352.972	24.1417	-328.83
TCGA-CF-A9FM-01A-11R-A38B-07	-1518.77	227.323	-1291.45
TCGA-CU-A0YN-01A-21R-A10U-07	-111.822	916.942	805.121
TCGA-CU-A0YO-01A-11R-A10U-07	-332.658	880.151	547.492
TCGA-CU-A0YR-01A-12R-A10U-07	132.008	1301.81	1433.82
TCGA-CU-A3KJ-01A-11R-A21D-07	-1045.77	436.617	-609.15
TCGA-CU-A3QU-01A-11R-A22U-07	-2026.62	-382.08	-2408.7
TCGA-CU-A3YL-01A-11R-A22U-07	-961.923	-109.763	-1071.69
TCGA-CU-A5W6-01A-11R-A28M-07	-942.174	162.68	-779.494
TCGA-CU-A72E-01A-12R-A33J-07	-148.208	294.733	146.525
TCGA-DK-A1A3-01A-11R-A13Y-07	234.877	675.634	910.511
TCGA-DK-A1A5-01A-11R-A13Y-07	334.52	384.891	719.411
TCGA-DK-A1A6-01A-11R-A13Y-07	-459.521	976.249	516.728
TCGA-DK-A1A7-01A-11R-A13Y-07	-1073.92	58.2864	-1015.64
TCGA-DK-A1AA-01A-11R-A13Y-07	-1422.61	70.997	-1351.61
TCGA-DK-A1AB-01A-11R-A13Y-07	904.627	979.729	1884.36
TCGA-DK-A1AC-01A-11R-A13Y-07	8.80091	953.785	962.586
TCGA-DK-A1AD-01A-11R-A13Y-07	-331.012	310.168	-20.8438
TCGA-DK-A1AE-01A-11R-A13Y-07	-1228.79	-360.855	-1589.65
TCGA-DK-A1AF-01A-11R-A13Y-07	1233.76	1749.28	2983.04
TCGA-DK-A1AG-01A-11R-A13Y-07	-1748.76	194.117	-1554.65
TCGA-DK-A2HX-01A-12R-A18C-07	974.057	293.223	1267.28
TCGA-DK-A2I1-01A-11R-A180-07	808.298	1245.28	2053.58
TCGA-DK-A2I2-01A-11R-A180-07	248.762	1599.57	1848.33
TCGA-DK-A2I4-01A-11R-A21D-07	1199.41	2758.49	3957.9
TCGA-DK-A2I6-01A-12R-A18C-07	-936.36	-228.128	-1164.49
TCGA-DK-A3IK-01A-32R-A21D-07	-394.154	-11.2664	-405.421
TCGA-DK-A3IL-01A-11R-A20F-07	-771.939	-257.122	-1029.06
TCGA-DK-A3IM-01A-11R-A20F-07	-1737.42	-639.716	-2377.13
TCGA-DK-A3IN-01A-11R-A20F-07	481.8	1027.68	1509.48
TCGA-DK-A3IQ-01A-31R-A32Y-07	1736.99	399.579	2136.57
TCGA-DK-A3IS-01A-21R-A21D-07	-1814.68	-171.591	-1986.27
TCGA-DK-A3IT-01A-31R-A20F-07	-53.3955	529.933	476.537
TCGA-DK-A3IU-01A-11R-A20F-07	917.345	2730.26	3647.6
TCGA-DK-A3IV-01A-22R-A21D-07	-1488.34	1268.09	-220.25
TCGA-DK-A3WW-01A-22R-A23N-07	-432.686	1973.51	1540.82
TCGA-DK-A3WX-01A-22R-A22U-07	118.433	1445.6	1564.03
TCGA-DK-A3WY-01A-11R-A22U-07	877.071	3046.44	3923.51
TCGA-DK-A3X1-01A-12R-A22U-07	-523.92	119.594	-404.326
TCGA-DK-A3X2-01A-11R-A22U-07	-1794.68	-937.915	-2732.59
TCGA-DK-A6AV-01A-12R-A30C-07	-982.624	332.312	-650.312
TCGA-DK-A6AW-01A-11R-A30C-07	-1108.43	-292.641	-1401.07
TCGA-DK-A6B0-01A-11R-A31N-07	-1727.93	-211.28	-1939.21
TCGA-DK-A6B1-01A-12R-A30C-07	-1211.79	-389.905	-1601.69
TCGA-DK-A6B2-01A-11R-A30C-07	627.698	1292.89	1920.59
TCGA-DK-A6B5-01A-11R-A31N-07	-931.125	784.56	-146.565
TCGA-DK-A6B6-01A-11R-A30C-07	-1443.43	788.351	-655.081
TCGA-DK-AA6L-01A-11R-A39I-07	-923.023	831.705	-91.3183
TCGA-DK-AA6M-01A-11R-A39I-07	-11.3999	1639.38	1627.98
TCGA-DK-AA6P-01A-11R-A39I-07	-1605.06	-782.594	-2387.65
TCGA-DK-AA6Q-01A-11R-A39I-07	-1509.46	1086.97	-422.495
TCGA-DK-AA6R-01A-11R-A42T-07	-896.953	204.253	-692.7
TCGA-DK-AA6S-01A-21R-A39I-07	778.819	1141.69	1920.51
TCGA-DK-AA6T-01A-11R-A39I-07	-123.948	2167.23	2043.28
TCGA-DK-AA6U-01A-11R-A39I-07	-1854.5	-396.647	-2251.15
TCGA-DK-AA6W-01A-12R-A39I-07	-1173.56	-63.587	-1237.14
TCGA-DK-AA6X-01A-12R-A42T-07	-559.782	878.575	318.793
TCGA-DK-AA71-01A-31R-A39I-07	-1247.75	-220.522	-1468.27
TCGA-DK-AA74-01A-11R-A39I-07	1432.21	2384.66	3816.87
TCGA-DK-AA75-01A-11R-A39I-07	-1882.35	-727.721	-2610.08
TCGA-DK-AA76-01A-11R-A39I-07	-1808.13	-1096.84	-2904.97
TCGA-DK-AA77-01A-11R-A39I-07	-1416.7	505.001	-911.703
TCGA-E5-A2PC-01A-11R-A206-07	-1523.63	452.595	-1071.03
TCGA-E5-A4TZ-01A-11R-A31N-07	-1973.42	-262.474	-2235.9
TCGA-E5-A4U1-01A-11R-A31N-07	-2037.85	-936.041	-2973.89
TCGA-E7-A3X6-01A-12R-A22U-07	-640.819	1095.33	454.511
TCGA-E7-A3Y1-01A-11R-A22U-07	-1269.25	-107.626	-1376.88
TCGA-E7-A4IJ-01A-31R-A26T-07	-1334.52	539.824	-794.695
TCGA-E7-A4XJ-01A-11R-A26T-07	-1361.03	-464.28	-1825.31
TCGA-E7-A519-01A-11R-A26T-07	-781.431	1313.26	531.832
TCGA-E7-A541-01A-11R-A26T-07	-812.952	1269.41	456.461
TCGA-E7-A5KE-01A-11R-A28M-07	-2171.95	-953.389	-3125.34
TCGA-E7-A5KF-01A-11R-A28M-07	-2385.07	-526.199	-2911.27
TCGA-E7-A677-01A-11R-A30C-07	-1077.48	167.59	-909.887
TCGA-E7-A678-01A-11R-A30C-07	-1881.91	18.3914	-1863.52
TCGA-E7-A6MD-01A-41R-A352-07	66.1611	1097.08	1163.24
TCGA-E7-A6ME-01A-22R-A32O-07	-1589.43	211.819	-1377.62
TCGA-E7-A6MF-01A-12R-A32O-07	-1829.58	-280.732	-2110.31
TCGA-E7-A7DU-01A-11R-A32O-07	-1532.32	-177.18	-1709.5
TCGA-E7-A7DV-01A-11R-A33J-07	595.294	2109.71	2705
TCGA-E7-A7PW-01A-11R-A352-07	-1856.25	-128.785	-1985.03
TCGA-E7-A7XN-01A-11R-A352-07	-895.821	1911.59	1015.77
TCGA-E7-A85H-01A-11R-A352-07	-534.715	608.702	73.9866
TCGA-E7-A8O7-01A-11R-A36F-07	-1312.76	651.164	-661.597
TCGA-E7-A8O8-01A-11R-A36F-07	-1417.89	-204.306	-1622.19
TCGA-E7-A97P-01A-11R-A38B-07	127.326	1733.08	1860.4
TCGA-E7-A97Q-01A-11R-A38B-07	-152.858	308.462	155.604
TCGA-FD-A3B3-01A-12R-A206-07	730.912	1978.75	2709.67
TCGA-FD-A3B4-01A-12R-A206-07	147.647	1364.44	1512.09
TCGA-FD-A3B5-01A-11R-A20F-07	-766.638	-247.387	-1014.03
TCGA-FD-A3B6-01A-21R-A20F-07	-180.94	1718.7	1537.76
TCGA-FD-A3B7-01A-31R-A20F-07	1295.67	2136.03	3431.7
TCGA-FD-A3B8-01A-31R-A20F-07	1656.26	2689.68	4345.94
TCGA-FD-A3N5-01A-11R-A21D-07	-900.477	367.209	-533.268
TCGA-FD-A3N6-01A-11R-A21D-07	-1046.86	323.829	-723.031
TCGA-FD-A3NA-01A-11R-A21D-07	-321.773	698.018	376.244
TCGA-FD-A3SJ-01A-12R-A22U-07	-205.68	12.9153	-192.764
TCGA-FD-A3SL-01A-21R-A22U-07	1129.89	753.4	1883.29
TCGA-FD-A3SM-01A-11R-A22U-07	154.037	-40.5039	113.533
TCGA-FD-A3SN-01A-12R-A22U-07	-291.831	319.256	27.4249
TCGA-FD-A3SO-01A-11R-A22U-07	393.336	1017.34	1410.67
TCGA-FD-A3SP-01A-31R-A22U-07	1689.58	1927.85	3617.43
TCGA-FD-A3SQ-01A-21R-A22U-07	803.542	891.757	1695.3
TCGA-FD-A3SR-01A-11R-A22U-07	361.359	993.79	1355.15
TCGA-FD-A3SS-01A-12R-A22U-07	-958.723	-406.527	-1365.25
TCGA-FD-A43N-01A-11R-A23W-07	-40.2219	362.428	322.206
TCGA-FD-A43P-01A-31R-A23W-07	-257.918	1960.05	1702.13
TCGA-FD-A43S-01A-21R-A23W-07	814.737	2279.04	3093.78
TCGA-FD-A43U-01A-11R-A23W-07	1033.45	2301.74	3335.2
TCGA-FD-A43X-01A-11R-A23W-07	-1790.56	-499.391	-2289.96
TCGA-FD-A43Y-01A-21R-A26T-07	77.8547	805.94	883.795
TCGA-FD-A5BR-01A-11R-A26T-07	-136.149	1052.96	916.809
TCGA-FD-A5BS-01A-21R-A26T-07	1668.82	3164.37	4833.19
TCGA-FD-A5BT-01A-11R-A26T-07	1480.23	2385.3	3865.52
TCGA-FD-A5BU-01A-31R-A26T-07	488.459	1313.45	1801.9
TCGA-FD-A5BV-01A-11R-A26T-07	-1058.56	-452.073	-1510.64
TCGA-FD-A5BX-01A-11R-A26T-07	820.86	1854.84	2675.7
TCGA-FD-A5BY-01A-31R-A28M-07	-180.541	437.07	256.529
TCGA-FD-A5BZ-01A-11R-A28M-07	1018.38	157.72	1176.1
TCGA-FD-A5C0-01A-11R-A28M-07	-428.897	212.368	-216.529
TCGA-FD-A5C1-01A-11R-A28M-07	701.106	1805.83	2506.93
TCGA-FD-A62N-01A-11R-A30C-07	1360.71	3006.38	4367.09
TCGA-FD-A62O-01A-11R-A30C-07	-861.529	-416.112	-1277.64
TCGA-FD-A62P-01A-32R-A30C-07	161.154	1162.68	1323.84
TCGA-FD-A62S-01A-11R-A30C-07	1228.01	1430.43	2658.44
TCGA-FD-A6TA-01A-12R-A33J-07	538.86	1265.02	1803.88
TCGA-FD-A6TB-01A-12R-A33J-07	489.244	1965.67	2454.91
TCGA-FD-A6TC-01A-21R-A33J-07	296.619	140.139	436.758
TCGA-FD-A6TD-01A-51R-A33J-07	286.948	1631.54	1918.48
TCGA-FD-A6TE-01A-12R-A33J-07	-1905.55	-88.8402	-1994.39
TCGA-FD-A6TF-01A-52R-A32O-07	461.657	443.299	904.956
TCGA-FD-A6TG-01A-11R-A32O-07	538.621	853.169	1391.79
TCGA-FD-A6TH-01A-11R-A32O-07	32.6497	157.024	189.674
TCGA-FD-A6TI-01A-11R-A32O-07	-693.92	-21.6333	-715.554
TCGA-FD-A6TK-01A-42R-A33J-07	904.79	1598.66	2503.45
TCGA-FJ-A3Z7-01A-12R-A23N-07	131.688	363.627	495.314
TCGA-FJ-A3Z9-01A-11R-A26T-07	-1931.44	-721.076	-2652.52
TCGA-FJ-A3ZE-01A-11R-A23N-07	-2032.59	-1008.63	-3041.22
TCGA-FJ-A3ZF-01A-11R-A23N-07	-1833.73	-1010.51	-2844.24
TCGA-FJ-A871-01A-11R-A352-07	-842.416	-485.807	-1328.22
TCGA-FT-A3EE-01A-11R-A206-07	-1058.68	-231.711	-1290.39
TCGA-FT-A61P-01A-11R-A30C-07	665.472	1202.09	1867.56
TCGA-G2-A2EC-01A-11R-A180-07	361.143	971.886	1333.03
TCGA-G2-A2EF-01A-12R-A18C-07	-664.777	1658.84	994.066
TCGA-G2-A2EJ-01A-11R-A180-07	-1304.14	409.713	-894.425
TCGA-G2-A2EK-01A-22R-A18C-07	-896.109	344.42	-551.69
TCGA-G2-A2EL-01A-12R-A18C-07	-2040.29	-1568.15	-3608.43
TCGA-G2-A2EO-01A-11R-A180-07	481.806	1423.97	1905.78
TCGA-G2-A2ES-01A-11R-A180-07	-27.3121	862.008	834.696
TCGA-G2-A3IB-01A-11R-A20F-07	-1436.35	-218.627	-1654.97
TCGA-G2-A3IE-01A-11R-A20F-07	-1340.96	-122.959	-1463.92
TCGA-G2-A3VY-01A-11R-A22U-07	-2049.18	-988.818	-3037.99
TCGA-G2-AA3B-01A-11R-A39I-07	-1707.77	306.223	-1401.55
TCGA-G2-AA3C-01A-21R-A39I-07	-17.8577	2029.08	2011.22
TCGA-G2-AA3D-01A-11R-A39I-07	-2081.88	-342.515	-2424.39
TCGA-G2-AA3F-01A-12R-A42T-07	-1119.98	-443.461	-1563.44
TCGA-GC-A3BM-01A-11R-A22U-07	-1498.33	-25.2754	-1523.6
TCGA-GC-A3I6-01A-11R-A20F-07	-483.414	834.807	351.394
TCGA-GC-A3OO-01A-11R-A22U-07	-24.0139	415.473	391.459
TCGA-GC-A3RB-01A-12R-A220-07	-1314.2	-180.546	-1494.74
TCGA-GC-A3RC-01A-11R-A22U-07	-398.153	1419.57	1021.42
TCGA-GC-A3RD-01A-12R-A22U-07	-1158.05	-101.319	-1259.37
TCGA-GC-A3WC-01A-31R-A22U-07	-167.172	1757.87	1590.69
TCGA-GC-A3YS-01A-11R-A23N-07	486.694	936.464	1423.16
TCGA-GC-A4ZW-01A-11R-A26T-07	-1658.72	-542.021	-2200.74
TCGA-GC-A6I1-01A-12R-A31N-07	-166.132	2365.05	2198.92
TCGA-GC-A6I3-01A-11R-A31N-07	-204.899	1659.14	1454.24
TCGA-GD-A2C5-01A-12R-A180-07	-187.872	51.2987	-136.573
TCGA-GD-A3OP-01A-21R-A220-07	18.6099	343.478	362.088
TCGA-GD-A3OQ-01A-32R-A220-07	-1178.24	-99.3534	-1277.59
TCGA-GD-A3OS-01A-12R-A220-07	-395.648	-49.7914	-445.44
TCGA-GD-A6C6-01A-21R-A31N-07	-1022.44	171.224	-851.219
TCGA-GD-A76B-01A-11R-A32O-07	-718.444	1396.6	678.154
TCGA-GU-A42P-01A-11R-A23W-07	-1909.35	-959.418	-2868.77
TCGA-GU-A42Q-01A-11R-A23W-07	-1423.7	-512.007	-1935.71
TCGA-GU-A42R-01A-11R-A23N-07	-1597.99	-648.916	-2246.91
TCGA-GU-A762-01A-11R-A33J-07	436.953	2383.72	2820.67
TCGA-GU-A763-01A-11R-A32O-07	-1940.23	-41.6756	-1981.91
TCGA-GU-A764-01A-11R-A352-07	294.826	1445.39	1740.22
TCGA-GU-A766-01A-11R-A32O-07	242.012	2421.33	2663.35
TCGA-GU-A767-01A-11R-A32O-07	-357.043	-98.4178	-455.461
TCGA-GU-AATO-01A-11R-A39I-07	-87.0766	1160.96	1073.88
TCGA-GU-AATP-01A-11R-A39I-07	528.366	759.807	1288.17
TCGA-GU-AATQ-01A-11R-A39I-07	-1069.44	159.551	-909.885
TCGA-GV-A3JV-01A-11R-A220-07	-177.653	632.429	454.776
TCGA-GV-A3JW-01A-11R-A20F-07	-1546.02	-981.625	-2527.65
TCGA-GV-A3JX-01A-11R-A20F-07	-1270.52	627.916	-642.603
TCGA-GV-A3JZ-01A-11R-A21D-07	-360.686	124.841	-235.845
TCGA-GV-A3QF-01A-31R-A22U-07	-1693.49	-428.64	-2122.13
TCGA-GV-A3QG-01A-11R-A220-07	1357.86	2695.53	4053.39
TCGA-GV-A3QH-01A-11R-A220-07	-2213.64	-725.979	-2939.62
TCGA-GV-A3QI-01A-11R-A220-07	-1848.15	-1152.82	-3000.97
TCGA-GV-A3QK-01B-11R-A23N-07	-1237.47	907.964	-329.506
TCGA-GV-A40E-01A-12R-A23N-07	-584.006	413.859	-170.147
TCGA-GV-A40G-01A-11R-A23N-07	-1813.09	-652.233	-2465.33
TCGA-GV-A6ZA-01A-12R-A33J-07	-1345.99	400.943	-945.048
TCGA-H4-A2HO-01A-11R-A180-07	-793.787	550.633	-243.154
TCGA-H4-A2HQ-01A-11R-A180-07	-1727.81	-333.129	-2060.94
TCGA-HQ-A2OE-01A-11R-A206-07	-1745.34	-390.552	-2135.89
TCGA-HQ-A2OF-01A-11R-A26T-07	-1685.57	-902.289	-2587.86
TCGA-HQ-A5ND-01A-11R-A26T-07	-1677.7	-151.747	-1829.45
TCGA-HQ-A5NE-01A-12R-A28M-07	-436.961	354.579	-82.3822
TCGA-K4-A3WS-01A-11R-A22U-07	1127.38	1241.77	2369.15
TCGA-K4-A3WU-01B-11R-A23N-07	184.201	1561.52	1745.72
TCGA-K4-A3WV-01A-11R-A22U-07	-1350.8	-827.785	-2178.59
TCGA-K4-A4AB-01B-12R-A28M-07	162.192	553.239	715.431
TCGA-K4-A4AC-01A-21R-A26T-07	-523.946	966.501	442.556
TCGA-K4-A54R-01A-11R-A26T-07	250.009	1384.52	1634.53
TCGA-K4-A5RH-01A-11R-A30C-07	891.464	2493.93	3385.39
TCGA-K4-A5RI-01A-11R-A28M-07	-566.692	228.557	-338.135
TCGA-K4-A5RJ-01A-11R-A28M-07	478.801	2801.22	3280.02
TCGA-K4-A6FZ-01A-11R-A31N-07	-909.571	921.417	11.8459
TCGA-K4-A6MB-01A-11R-A31N-07	-433.891	-192.609	-626.5
TCGA-K4-A83P-01A-11R-A352-07	1137.63	2526.23	3663.86
TCGA-K4-AAQO-01A-11R-A38B-07	452.013	845.119	1297.13
TCGA-KQ-A41N-01A-11R-A33J-07	-1236.94	-731.981	-1968.92
TCGA-KQ-A41O-01A-12R-A352-07	-2502.82	-1426.77	-3929.59
TCGA-KQ-A41P-01A-12R-A33J-07	-76.0762	541.421	465.345
TCGA-KQ-A41Q-01A-11R-A33J-07	-1406.94	-404.836	-1811.77
TCGA-KQ-A41R-01A-21R-A352-07	-1303.47	-347.87	-1651.34
TCGA-KQ-A41S-01A-12R-A33J-07	353.972	303.416	657.388
TCGA-LC-A66R-01A-41R-A30C-07	-267.878	1537.2	1269.32
TCGA-LT-A5Z6-01A-11R-A28M-07	-1795.21	74.906	-1720.3
TCGA-LT-A8JT-01A-11R-A36F-07	-1481.13	173.192	-1307.94
TCGA-MV-A51V-01A-11R-A26T-07	-1224.2	-552.798	-1777
TCGA-PQ-A6FI-01A-11R-A31N-07	-1190.29	474.267	-716.026
TCGA-PQ-A6FN-01A-11R-A31N-07	-516.939	705.864	188.925
TCGA-R3-A69X-01A-22R-A30C-07	497.744	1287.81	1785.55
TCGA-S5-A6DX-01A-11R-A31N-07	362.705	1887.88	2250.58
TCGA-S5-AA26-01A-11R-A38B-07	-1876.12	-584.274	-2460.39
TCGA-SY-A9G0-01A-12R-A38B-07	1111.71	705.649	1817.36
TCGA-SY-A9G5-01A-11R-A38B-07	782.545	1708.13	2490.68
TCGA-UY-A78K-01A-11R-A33J-07	-519.052	1803.76	1284.71
TCGA-UY-A78L-01A-12R-A33J-07	-233.361	226.737	-6.62453
TCGA-UY-A78M-01A-21R-A352-07	-300.033	-233.228	-533.261
TCGA-UY-A78N-01A-12R-A33J-07	-1172.83	-869.392	-2042.23
TCGA-UY-A78O-01A-12R-A33J-07	-869.454	-27.2652	-896.719
TCGA-UY-A78P-01A-12R-A36F-07	201.816	1991.66	2193.48
TCGA-UY-A8OB-01A-12R-A42T-07	-1272.66	580.527	-692.133
TCGA-UY-A8OC-01A-11R-A36F-07	350.97	328.515	679.485
TCGA-UY-A8OD-01A-11R-A36F-07	556.062	982.297	1538.36
TCGA-UY-A9PA-01A-11R-A38B-07	-1625.7	831.08	-794.62
TCGA-UY-A9PB-01A-11R-A38B-07	763.073	1939.61	2702.68
TCGA-UY-A9PD-01A-11R-A38B-07	-253.961	-35.5836	-289.545
TCGA-UY-A9PE-01A-11R-A38B-07	-515.07	-246.464	-761.534
TCGA-UY-A9PF-01A-11R-A38B-07	-445.635	475.54	29.9047
TCGA-UY-A9PH-01A-11R-A38B-07	237.878	2027.42	2265.3
TCGA-XF-A8HB-01A-11R-A36F-07	-1906.59	-385.182	-2291.77
TCGA-XF-A8HC-01A-11R-A36F-07	-2017.85	-932.864	-2950.71
TCGA-XF-A8HD-01A-11R-A36F-07	-255.093	1428.61	1173.52
TCGA-XF-A8HE-01A-11R-A36F-07	-256.607	1334.75	1078.14
TCGA-XF-A8HF-01A-11R-A36F-07	-174.946	487.878	312.932
TCGA-XF-A8HG-01A-11R-A36F-07	-1634.78	-475.928	-2110.71
TCGA-XF-A8HH-01A-11R-A38B-07	229.908	313.77	543.678
TCGA-XF-A8HI-01A-11R-A38B-07	-1526.67	28.539	-1498.13
TCGA-XF-A9SH-01A-11R-A39I-07	-874.429	142.129	-732.3
TCGA-XF-A9SI-01A-11R-A39I-07	727.199	2808.42	3535.62
TCGA-XF-A9SJ-01A-11R-A39I-07	217.376	1411.41	1628.79
TCGA-XF-A9SK-01A-11R-A42T-07	745.382	1242.28	1987.67
TCGA-XF-A9SL-01A-11R-A39I-07	1105.16	2044.33	3149.49
TCGA-XF-A9SM-01A-11R-A42T-07	666.284	2459.53	3125.81
TCGA-XF-A9SP-01A-11R-A39I-07	941.02	849.817	1790.84
TCGA-XF-A9ST-01A-11R-A42T-07	-1452.33	-910.761	-2363.1
TCGA-XF-A9SU-01A-31R-A39I-07	455.15	961.231	1416.38
TCGA-XF-A9SV-01A-21R-A42T-07	174.011	-57.1817	116.83
TCGA-XF-A9SW-01A-11R-A42T-07	1486.64	1153.96	2640.59
TCGA-XF-A9SX-01A-21R-A39I-07	977.306	1911.63	2888.93
TCGA-XF-A9SY-01A-21R-A42T-07	568.58	2093.01	2661.59
TCGA-XF-A9SZ-01A-11R-A39I-07	627.973	845.837	1473.81
TCGA-XF-A9T0-01A-11R-A39I-07	-198.494	646.955	448.461
TCGA-XF-A9T2-01A-11R-A42T-07	-164.245	-72.2637	-236.508
TCGA-XF-A9T3-01A-11R-A42T-07	517.884	1031.17	1549.05
TCGA-XF-A9T4-01A-11R-A39I-07	-718.018	635.467	-82.5512
TCGA-XF-A9T5-01A-11R-A42T-07	109.354	2144.47	2253.83
TCGA-XF-A9T6-01A-11R-A42T-07	-1195.76	310.79	-884.966
TCGA-XF-A9T8-01A-11R-A39I-07	369.018	1995.77	2364.79
TCGA-XF-AAME-01A-12R-A42T-07	1564.84	2374.89	3939.73
TCGA-XF-AAMG-01A-11R-A42T-07	-177.348	-12.6415	-189.99
TCGA-XF-AAMH-01A-11R-A42T-07	-863.886	-588.474	-1452.36
TCGA-XF-AAMJ-01A-11R-A42T-07	1198.46	622.594	1821.05
TCGA-XF-AAML-01A-11R-A42T-07	-1949.33	245.007	-1704.32
TCGA-XF-AAMQ-01A-11R-A42T-07	-687.052	1151.38	464.329
TCGA-XF-AAMR-01A-31R-A42T-07	575.857	581.173	1157.03
TCGA-XF-AAMT-01A-11R-A42T-07	849.712	1037.36	1887.08
TCGA-XF-AAMW-01A-11R-A42T-07	-433.066	814.911	381.844
TCGA-XF-AAMX-01A-11R-A42T-07	-375.471	-239.55	-615.021
TCGA-XF-AAMY-01A-11R-A42T-07	186.512	211.247	397.759
TCGA-XF-AAMZ-01A-11R-A42T-07	-973.872	314.328	-659.544
TCGA-XF-AAN0-01A-11R-A42T-07	-433.472	926.142	492.67
TCGA-XF-AAN1-01A-31R-A42T-07	-1453.79	-126.442	-1580.23
TCGA-XF-AAN2-01A-11R-A42T-07	-901.799	948.312	46.513
TCGA-XF-AAN3-01A-11R-A42T-07	283.191	739.143	1022.33
TCGA-XF-AAN4-01A-11R-A42T-07	1629.95	2066.69	3696.64
TCGA-XF-AAN5-01A-11R-A42T-07	-563.183	1453.07	889.89
TCGA-XF-AAN7-01A-11R-A42T-07	-154.732	63.1241	-91.6079
TCGA-XF-AAN8-01A-11R-A42T-07	2133.43	2204.51	4337.93
TCGA-YC-A89H-01A-11R-A36F-07	-646.89	366.618	-280.272
TCGA-YC-A8S6-01A-31R-A38B-07	607.975	1324.76	1932.74
TCGA-YC-A9TC-01A-22R-A39I-07	-931.068	-161.16	-1092.23
TCGA-YF-AA3L-01A-11R-A38B-07	-1289.55	-118.32	-1407.87
TCGA-YF-AA3M-01A-11R-A42T-07	-1497.93	-109.464	-1607.4
TCGA-ZF-A9R0-01A-11R-A38B-07	-607.694	394.33	-213.364
TCGA-ZF-A9R1-01A-11R-A39I-07	-1205.23	-139.801	-1345.03
TCGA-ZF-A9R2-01A-11R-A39I-07	-2418.6	-747.304	-3165.91
TCGA-ZF-A9R3-01A-11R-A38B-07	-1182.91	253.291	-929.62
TCGA-ZF-A9R4-01A-11R-A38B-07	-1581.33	186.129	-1395.2
TCGA-ZF-A9R5-01A-12R-A42T-07	-1723.29	-75.5974	-1798.88
TCGA-ZF-A9R7-01A-11R-A38B-07	-950.98	2017.52	1066.54
TCGA-ZF-A9R9-01A-11R-A38B-07	754.641	548.225	1302.87
TCGA-ZF-A9RC-01A-11R-A38B-07	4.13544	-232.294	-228.159
TCGA-ZF-A9RD-01A-11R-A42T-07	-193.122	1848.44	1655.32
TCGA-ZF-A9RE-01A-11R-A38B-07	-1996.4	-326.809	-2323.21
TCGA-ZF-A9RF-01A-11R-A38B-07	-738.401	1894.27	1155.87
TCGA-ZF-A9RL-01A-11R-A38B-07	-2185.41	-893.943	-3079.35
TCGA-ZF-A9RM-01A-11R-A38B-07	-2485.34	-853.29	-3338.63
TCGA-ZF-A9RN-01A-11R-A42T-07	-1127.82	1053.21	-74.6087
TCGA-ZF-AA4N-01A-11R-A38B-07	-775.111	768.405	-6.70609
TCGA-ZF-AA4R-01A-11R-A38B-07	167.081	-112.66	54.4208
TCGA-ZF-AA4T-01A-11R-A38B-07	-1758.12	-371.221	-2129.34
TCGA-ZF-AA4U-01A-11R-A38B-07	-2233.31	-270.487	-2503.79
TCGA-ZF-AA4V-01A-11R-A38B-07	-449.692	859.66	409.968
TCGA-ZF-AA4W-01A-12R-A38B-07	-1278.47	6.7058	-1271.77
TCGA-ZF-AA4X-01A-11R-A38B-07	-2432.86	-358.02	-2790.88
TCGA-ZF-AA51-01A-21R-A39I-07	64.3441	1450.55	1514.89
TCGA-ZF-AA52-01A-12R-A39I-07	846.292	1078.72	1925.01
TCGA-ZF-AA53-01A-11R-A39I-07	656.077	1689.97	2346.05
TCGA-ZF-AA54-01A-11R-A39I-07	873.728	1762.36	2636.09
TCGA-ZF-AA56-01A-31R-A39I-07	-169.838	1033.42	863.587
TCGA-ZF-AA58-01A-12R-A42T-07	832.421	2408.91	3241.33
TCGA-ZF-AA5H-01A-11R-A39I-07	-186.553	1291.89	1105.33
TCGA-ZF-AA5N-01A-11R-A42T-07	-1527.7	-157.085	-1684.79
TCGA-ZF-AA5P-01A-11R-A39I-07	732.775	949.891	1682.67

## Sheet: S6
Table S6: trainRisk
id	futime	fustat	ATP1B3-AS1	AL136295.2	BDNF-AS	AC073534.2	AL022322.1	AC104564.3	TMEM147-AS1	AL022328.2	AC132872.3	AC097359.2	KCNQ1OT1	riskScore	risk
TCGA-GU-A767	0.394521	1	0.391832	0.338104	0.333272	1.49152	2.42341	0.0905247	7.40695	2.53222	1.40536	0.308349	0.0399509	0.647024	low
TCGA-G2-AA3C	0.578082	1	0	0.768513	0.0700336	0	0.0546292	0.112235	0.816293	2.20173	1.20309	0.294915	0.049532	0.776287	high
TCGA-E7-A8O8	0.0356164	0	0.115958	0.992239	0.36275	0.972707	1.26267	0.421937	3.55782	2.07782	0.970433	0.173379	0.010464	0.56553	low
TCGA-XF-A9SM	2.87123	0	0.37589	0.662211	0.543692	0.0618262	0.197257	0.709206	0.88716	1.28821	1.61033	1.04517	0.0256971	0.749837	high
TCGA-DK-A3IN	0.684932	1	0.333647	0.0959657	0.0865777	0.0940766	0.387697	0.269787	1.22821	0.56005	0.797781	0.802683	0.0365599	1.06349	high
TCGA-2F-A9KR	8.72055	1	1.84856	0.750375	0.45733	0.941572	6.63404	0.8197	5.00658	7.91748	2.4952	0.703888	0.265384	0.551526	low
TCGA-E5-A4U1	3.23562	0	0.859753	2.76297	0.393756	5.35189	2.32529	0.32086	4.56495	7.03261	1.85808	0.322674	0.169002	0.287846	low
TCGA-E7-A3Y1	0.446575	0	0.401709	2.36862	0.735465	1.13268	2.75554	2.69139	5.33776	7.4847	1.85244	0.397409	0.127111	0.235917	low
TCGA-FD-A5BV	0.446575	1	0.336608	0.423577	0.305712	0.74743	0.971537	0.748501	2.82615	1.58206	3.42067	0.821161	0.0700706	0.700075	low
TCGA-UY-A78M	1.89041	1	0.272844	0.659208	0.03304	0.915494	1.01659	0.0441244	4.4929	1.98767	1.23955	0.592604	0.0557337	0.81377	high
TCGA-HQ-A5NE	1.0137	1	0.634845	0.145249	0.262079	0.0569558	0.469438	0.746672	1.51843	1.0172	1.13848	0.436002	0.0255666	0.865409	high
TCGA-XF-AAMT	0.246575	1	0.728031	0.806194	0.51917	0.431086	2.06307	1.02039	2.23093	1.48276	2.05994	0.847916	0.0875963	0.64541	low
TCGA-XF-A9SU	0.49863	1	0.153308	0.463003	0.170178	0.605185	0.40226	0.185948	1.41767	1.62123	0.641506	0.687673	0.0367872	0.864549	high
TCGA-CF-A47S	0.912329	0	0.187033	0.820382	0.380175	1.13384	1.12171	0.626545	1.54447	2.87262	1.74094	0.25652	0.0128227	0.559433	low
TCGA-FD-A6TK	0.90411	0	0.09652	0.728745	0.121751	0.14288	0.265918	0.429254	1.18009	1.21917	0.692366	0.372182	0.0257339	0.783073	high
TCGA-E7-A5KF	0.0547945	0	0.306044	1.07832	0.525023	0.50338	2.0477	1.77352	1.13675	2.54718	2.16486	0.329146	0.0341032	0.451416	low
TCGA-UY-A78L	3.08767	0	0.421727	0.330205	0.226973	0.184974	0.393442	0.22734	1.4359	1.01859	1.8207	0.376124	0.0443993	0.834393	high
TCGA-S5-A6DX	0.153425	1	0.145638	1.13625	0.0514384	2.01218	0.611416	0	1.3242	2.48131	0.174117	0.40113	0.0812435	0.696037	low
TCGA-XF-A8HI	1.49041	1	0.789087	1.25266	1.29856	1.13815	2.0386	1.81601	3.4617	5.88401	4.42668	0.554091	0.110296	0.276959	low
TCGA-XF-A9T5	5.55342	0	0.192561	1.09849	0.0777275	0.316724	1.49893	0.363313	1.86757	2.82825	1.80336	0.454603	0.0231689	0.672554	low
TCGA-XF-A9SX	1.96986	1	0.343894	1.08186	0.37306	0.169691	0.451166	0.0695184	0.698546	0.606114	0.719499	1.01484	0.0292697	0.829096	high
TCGA-G2-A2EK	1.32877	0	1.00235	0.651683	0.712261	0.741895	2.36702	0.979355	3.37726	3.50874	1.44801	0.479846	0.0919933	0.555884	low
TCGA-ZF-A9RE	0.290411	1	2.97029	0.631258	0.353026	0.260561	0.502256	0.800593	1.71619	2.5594	1.7361	0.436322	0.0598347	0.993829	high
TCGA-E7-A7DV	0.10137	0	0.0865551	0.653508	0.157221	0.128129	0.0794881	0.104983	0.579362	0.68649	0.750236	0.333757	0.00532548	0.826157	high
TCGA-XF-AAN1	2.57808	1	1.02935	1.12259	0.36356	1.1005	0.675219	2.01148	4.67964	3.93083	2.10234	0.675031	0.0964067	0.525492	low
TCGA-DK-AA6P	1.25205	0	0.285792	0.287705	0.34608	0.564083	5.11793	2.07983	3.0132	3.60991	2.47716	0.146186	0.0589062	0.458486	low
TCGA-CF-A47Y	1.02192	0	0.529979	0.654783	0.787637	1.47398	5.42332	0.97396	5.97269	3.28346	2.41926	0.424645	0.0450584	0.413709	low
TCGA-XF-AAMZ	3.69315	1	0.211283	0.584917	0.20255	0.625531	1.10876	0.341688	2.79577	2.11019	0.378899	0.465548	0.0103997	0.758436	high
TCGA-DK-AA6L	3.1863	1	0.993148	0.499898	0.0859038	0.0700082	0.688699	0.516254	3.33757	1.16695	3.13802	0.2233	0.041028	0.809868	high
TCGA-XF-A9T4	1.35616	1	0.879608	0.391662	0.26629	0.166936	0.106522	0.136779	0.649245	0.874534	0.829158	0.303503	0.0907546	0.920042	high
TCGA-K4-A6MB	1.28493	0	0.445675	0.515957	0.251855	0.307878	0.736716	0.720747	3.85568	1.93757	1.78497	0.967986	0.141676	0.80321	high
TCGA-DK-A1A5	0.178082	1	0.154884	0.116941	0.160205	0.191064	0.152398	0.313099	0.638215	1.16018	0.370343	0.609422	0.0162002	0.958204	high
TCGA-SY-A9G0	2.76164	1	0.776974	0.273761	0.352829	0.613422	0.448509	0.691089	2.59134	3.46919	2.13649	0.672575	0.155525	0.757451	high
TCGA-FD-A5BX	0.473973	1	0.0660077	0.365473	0.306406	0.130283	0.138556	0	0.464812	0.736811	0.355119	0.218165	0.0173281	0.820915	high
TCGA-BL-A13J	0.221918	1	18.5091	0.637018	0.469012	0.885049	1.53772	1.36428	1.70301	1.99287	2.20982	2.13718	4.64748	13.6733	high
TCGA-ZF-AA54	1.61644	1	0.710681	0.227639	0.136913	0.191278	0.169521	0.156725	1.72481	1.13871	1.04276	1.00667	0.0416061	1.10519	high
TCGA-GU-A766	1.31507	0	0.101247	0.305773	0.0970619	0	0.411769	0	1.86465	1.30861	1.51307	0.557725	0.020557	0.912701	high
TCGA-LT-A8JT	1.75616	0	0.58989	1.03922	0.357164	0.533636	2.2314	1.19247	2.46874	4.64968	3.52621	0.448734	0.0399236	0.494452	low
TCGA-FJ-A3Z9	1.05479	1	0.415276	0.87095	0.230486	1.77591	2.23374	0.727552	2.30836	4.67618	2.11005	0.490196	0.0851691	0.554153	low
TCGA-DK-A1AC	10.9068	0	1.27408	0.662682	0.149999	0.796329	0.300872	1.44232	1.70234	0.723572	1.21858	0.374314	0.0430277	0.788059	high
TCGA-C4-A0F1	0.243836	0	0.639722	0.0990776	0.32278	0	0.180766	0.278536	0.544534	0.491479	0.264745	0.232349	0.017157	0.926213	high
TCGA-XF-AAN4	2.25479	1	0.884066	0.889984	0.308192	0.0793149	0.168703	0.714858	1.05726	1.74703	2.16193	0.619812	0.0586796	0.752929	high
TCGA-4Z-AA83	5.54521	0	1.08235	1.75113	0.553914	0.686665	2.08938	2.7506	1.78277	3.04314	5.823	0.21902	0.104013	0.31665	low
TCGA-4Z-AA7N	3.74521	1	2.85118	0.60717	0.232389	0.216443	0.74811	1.15273	1.78201	4.38094	2.8843	0.414222	0.146637	0.889074	high
TCGA-HQ-A2OE	3.21644	0	0.870607	0.392885	0.515013	0.237016	2.59156	0.4855	0.892065	1.97538	2.56624	1.03949	0.136932	0.781644	high
TCGA-GV-A3JV	1.18904	1	0.720073	0.57565	0.235091	0.376213	1.22254	2.26051	2.28128	3.55854	2.58265	0.65332	0.120924	0.593588	low
TCGA-XF-A9T8	1.14521	1	1.68186	0.476188	0.371263	0.207473	0.248229	0.297489	1.22012	1.08072	1.31955	0.264704	0.0224206	0.917424	high
TCGA-KQ-A41S	0.0958904	0	2.05616	0.284614	0.295676	0.202917	0.566484	0.872872	1.36835	2.56698	1.84368	0.558235	0.0972013	0.964685	high
TCGA-CU-A3YL	2.48219	0	0.4361	1.75608	0.632614	3.60441	5.24933	2.73289	11.4864	6.69345	6.81051	0.368923	0.116495	0.177721	low
TCGA-CF-A8HY	0.945205	0	0.0643595	0.226766	0.344218	1.52436	0.692369	0.104082	0.647436	0.983091	0.807921	0.232976	0.00184793	0.72704	low
TCGA-4Z-AA7W	2.30137	0	0.0694181	0.419296	0.210155	0.0685071	0.491788	0.112263	0.923936	1.42741	0.663941	0.152958	0.0304671	0.790204	high
TCGA-FD-A43U	1.74247	0	0.228292	0.976733	0.293728	0.901182	1.82697	0.184597	1.78865	1.64298	1.60348	0.583868	0.0285604	0.663537	low
TCGA-BT-A0S7	0.547945	1	0.171275	0.0862107	0.406169	0.0845136	0.292112	0	1.3585	0.352184	0.307151	0.525654	0.0453136	0.907573	high
TCGA-ZF-A9R3	2.6	1	0.439891	1.03328	0.40938	0.482354	0.205194	1.30422	1.83058	3.33096	2.22052	1.26928	0.065959	0.647235	low
TCGA-GU-A42P	0.909589	1	0.35427	0.93123	0.40517	0.388468	3.40837	1.49598	3.27142	4.78707	4.4943	0.675289	0.161138	0.449405	low
TCGA-E7-A5KE	0.0465753	0	0.740522	1.14689	0.293164	1.57404	1.07614	3.40849	7.96956	3.07886	2.41763	0.40344	0.434126	0.386301	low
TCGA-ZF-AA4V	4.94795	0	0.194413	0.684999	0.102998	0.383723	0.943709	0.707412	1.05685	2.39857	1.07499	0.673161	0.0869213	0.771106	high
TCGA-ZF-AA53	4.82466	0	0.149483	0.150484	0.0905085	0.147522	0.0588337	0.302182	0.410641	1.05386	0.982931	1.25869	0.0137959	1.11192	high
TCGA-BL-A13I	0.610959	1	9.90655	0.492748	0.329954	0.389848	0.382065	1.1562	1.92944	1.73153	0.818968	1.63757	1.17229	3.99882	high
TCGA-CU-A72E	1.13151	1	0.386005	0.280647	0.458777	0.25396	0.596442	0.208083	1.3707	1.18429	0.564041	0.344265	0.0293793	0.785168	high
TCGA-FD-A6TA	5.23836	0	0.929552	0.300785	0.388614	0.393151	0.783971	0.966392	1.03786	1.56032	2.14327	0.438901	0.0419412	0.747682	high
TCGA-CF-A47X	1.05205	0	0.725078	1.03727	0.504484	0.828546	2.30303	1.66632	4.38824	3.16124	3.69558	0.198206	0.0363156	0.422434	low
TCGA-FD-A62O	0.591781	1	1.09639	0.490545	0.559343	0.601111	2.57311	0.443271	2.69605	2.3618	1.0195	0.469742	0.0869452	0.703286	low
TCGA-BL-A3JM	0.561644	1	1.16099	0.961397	0.151172	0.0369597	1.5821	0.454246	3.39652	1.80421	1.67905	0.259352	0.0892517	0.764146	high
TCGA-FJ-A3ZF	1.43562	0	0.499379	1.2209	0.543531	3.9074	3.75308	1.0095	10.5689	2.66142	3.09177	0.763506	0.0932001	0.375393	low
TCGA-CF-A5UA	1	0	0	0.94609	0.407244	0.491012	1.33449	0.223507	2.00632	1.49401	0.0330464	0.44374	0.00884353	0.657111	low
TCGA-FD-A3SM	1.49863	1	0.343843	0.173072	0.208189	0.145428	0.579985	0.397189	0.813425	1.21205	0.587259	0.966372	0.0471469	1.00169	high
TCGA-BL-A5ZZ	1.03288	0	1.6076	0.156616	0.109896	0.204711	0.190497	0.209663	0.951057	0.792134	0.836986	0.905966	0.0257382	1.29724	high
TCGA-BT-A20J	1.5863	1	0.343481	0.311202	0.38821	0	0.702974	0.333288	1.06317	0.84754	1.10875	0.594658	0.0371948	0.831827	high
TCGA-FT-A61P	0.923288	0	0.710281	0.744829	0.161272	0.292067	0.279552	0.38289	1.17255	0.625935	1.34453	0.558949	0.0407881	0.867058	high
TCGA-ZF-AA5N	0.460274	1	0.278328	0.700478	0.0842604	0.412013	0.766811	0.112528	1.10919	1.55342	1.08145	1.09514	0.032537	0.949822	high
TCGA-DK-AA6U	1.58356	0	0.338785	0.462857	0.239313	0.477627	0.71114	1.1349	3.51293	3.15614	2.28555	0.411331	0.0823851	0.636121	low
TCGA-BT-A20O	1.0137	1	1.58705	0.332848	0.15348	0	0.0867542	0.374293	2.91672	2.29213	0.988226	0.915869	0.0257678	1.14434	high
TCGA-GD-A3OS	1.74795	0	0.621013	0.661945	0.608248	0.144203	1.44734	1.21107	7.27332	2.87584	1.17919	1.41436	0.137703	0.685632	low
TCGA-XF-A9SZ	2.35342	1	0.203393	0.443634	0.25314	0.93671	1.4765	0.109643	3.216	0.716959	1.09425	1.28046	0.0189103	0.915629	high
TCGA-DK-AA76	1.00274	0	0.741073	0.339106	0.285537	1.26324	1.25507	1.30742	2.33554	1.86026	1.73171	0.190859	0.0201728	0.640169	low
TCGA-DK-A3IL	1.13151	1	0.387853	0.836677	0.223653	0.382763	0.683296	1.20967	6.5128	3.12499	2.186	0.680198	0.144999	0.61919	low
TCGA-XF-A9SH	5.4	1	0.389954	0.147211	0.354161	0.384836	1.43246	0.867123	3.92281	2.40553	2.9138	0.398931	0.0199939	0.656286	low
TCGA-FD-A5BU	1.61096	0	0.187755	0.0945061	0.271572	0.247055	0.377695	0.0506065	0.837835	0.514763	0.261883	0.492508	0.013349	0.939899	high
TCGA-C4-A0F0	0.161644	0	0.0764816	0.153987	0.0231538	0	0	0.0618432	0.142039	0	0	0.288895	0.00972508	1.02479	high
TCGA-FD-A3N5	1.87671	1	0.747357	0.413798	0.0905012	0	0.0882435	0.392805	0.7923	0.834238	0.826489	0.252894	0.0298887	0.935955	high
TCGA-ZF-A9R5	2.9863	0	2.88776	4.09365	0.96344	0.697925	3.6803	1.62024	4.61971	5.26279	2.88879	0.454499	0.199915	0.264109	low
TCGA-CU-A3KJ	1.53973	0	0.993941	0.58099	0.307374	0.0632837	0.235558	0.518518	1.42662	2.05321	3.20076	0.237175	0.0707548	0.728243	high
TCGA-FD-A43X	0.30137	0	0.909339	0.938312	0.587288	1.92942	0.429477	1.875	5.11918	4.35403	2.47329	0.400734	0.0736661	0.43337	low
TCGA-BT-A20T	1.2411	1	0.187649	0.425037	0.463936	0.740747	0.516985	0.606935	1.37221	1.15756	0.28043	0.339638	0.0165486	0.691223	low
TCGA-G2-A2EF	5.16164	0	0.882315	0.700328	0.489702	0.368389	0.160275	0.548802	8.61584	2.03357	3.65141	0.395234	0.14184	0.605016	low
TCGA-BT-A20V	0.421918	1	1.04035	0.281968	0.436086	0.0789763	1.32287	0.388258	1.60389	0.517171	0.717567	0.302285	0.0374208	0.851625	high
TCGA-CF-A3MF	1.04932	0	0.229947	0.75233	0.116023	1.30484	0.754187	0.185936	1.38347	2.43169	2.06184	0.0723818	0.0714472	0.64896	low
TCGA-CF-A47T	1.05479	1	0.410383	0.855769	0.34905	0.809994	0.73837	0.805889	2.71743	1.96324	1.85739	0.387536	0.0379947	0.609439	low
TCGA-YC-A8S6	0.80274	0	0.497418	0.667663	0.217514	1.14541	0.456805	0.670355	1.23172	1.60728	2.47786	0.221815	0.046587	0.655928	low
TCGA-DK-A3IS	4.18904	0	0.121256	0.651028	0.644443	0.438771	1.10295	0.457557	1.24169	1.02108	0.773161	0.623419	0.0227132	0.647286	low
TCGA-XF-A9SJ	0.268493	1	0.118937	0.628601	0.150028	0.410818	0.90502	0.14426	1.04921	1.22283	0.92427	0.411825	0.0148797	0.795053	high
TCGA-DK-AA6T	1.56712	0	0.191983	2.35142	0.26477	0.694698	1.1418	0.413967	4.33301	3.57167	0.956352	0.151079	0.030449	0.439409	low
TCGA-GC-A3OO	1.31781	0	1.47148	0.142435	0.645362	0.22341	0.727642	0.59492	0.797063	0.797993	0.710455	0.668056	0.0543214	0.909347	high
TCGA-E7-A6ME	2.00274	0	0.201562	1.25129	0.474604	0.46414	1.48084	0.814919	3.69137	1.65785	1.32538	0.877684	0.119055	0.586941	low
TCGA-XF-AAN5	6.28219	0	0.720823	1.14894	0.14548	0.474242	0.12609	0.874289	1.26432	1.62335	1.14904	0.321439	0.0320307	0.70075	low
TCGA-ZF-A9R2	1.7589	0	0.610914	0.102501	0.739787	1.00483	0.801479	0.768424	3.29867	0.837462	1.50133	0.373919	0.0448269	0.637693	low
TCGA-ZF-AA4T	1.6411	1	0.466385	0.402434	0.0134469	0.394512	1.74819	0.915862	1.41266	1.64401	2.66845	0.471879	0.00573906	0.769943	high
TCGA-E7-A4IJ	1.84658	1	0.207002	0.798818	0.201928	1.22571	0.633669	0.613734	2.03966	2.71604	1.64987	0.466975	0.255856	0.645405	low
TCGA-FD-A6TE	1.03014	0	0.887172	1.25847	0.614479	0.358171	0.380916	1.33692	0.961118	2.06116	2.67575	1.51689	0.113636	0.655275	low
TCGA-XF-AAMH	0.942466	1	0	0.278353	0.184157	0.654897	1.24787	0.0894321	1.2795	0.812225	0.595029	0.487403	0.0621518	0.844897	high
TCGA-FD-A3B8	1.05205	0	0.178884	0.247612	0.225646	0.0441342	0.0938737	0.216969	0.809783	1.07722	1.01586	0.626432	0.0251309	0.91095	high
TCGA-XF-A9SY	1.75342	0	0.43538	0.365245	0.0512578	0	0.114238	0.469399	2.91424	0.980512	1.17117	0.513927	0.112806	0.924968	high
TCGA-CU-A0YN	1.07671	1	0.415601	0.627574	0.089121	0.102537	0.149941	0.336056	2.40799	1.09874	1.05585	0.580519	0.0675492	0.88645	high
TCGA-FD-A5BZ	2.28767	1	0.892199	0.75999	0.242399	0.33865	0.810349	0.388464	1.93844	2.33859	0.902564	0.691305	0.0593985	0.839027	high
TCGA-BT-A20P	1.49041	1	0.577277	1.40442	0.757308	0.379801	6.286	1.08917	2.43457	1.5827	2.18552	0.363426	0.0848489	0.401681	low
TCGA-XF-A8HD	8.12055	0	0.397596	0.778278	0.374476	0.217988	2.78197	0.464384	1.48706	2.30992	1.82216	0.319837	0.0530935	0.619493	low
TCGA-GV-A3JX	1.59178	0	0.121343	0.81437	0.595926	0.319335	0.36084	0.85036	1.02036	0.807944	1.83757	0.814847	0.154959	0.628659	low
TCGA-XF-A9SP	1.24384	1	0.191521	0.642677	0.554037	0.252011	0.737038	0.412972	3.15179	1.05018	1.03038	0.803817	0.0366605	0.707056	low
TCGA-DK-A3IK	0.4	1	0.742504	0.637552	0.317342	1.1638	6.57815	0.565074	4.72496	3.05355	2.42812	0.439948	0.13114	0.557425	low
TCGA-C4-A0F6	1.91781	0	0.268083	0.314857	0.162318	0.0881883	0.234471	0.505803	2.60694	0.209998	0.427342	1.65959	0.308628	1.16095	high
TCGA-CF-A7I0	1.00822	0	0.6819	0.405638	0.819492	1.10119	1.52897	0.902268	6.09218	6.22776	2.37162	0.341482	0.0968786	0.454342	low
TCGA-GU-A764	1.67123	0	0.201765	0.4824	0.295229	0.248897	1.13822	0.326296	0.718199	0.711222	1.2061	0.48427	0.037242	0.781058	high
TCGA-GU-A42R	1.58082	1	2.08592	1.07619	0.126297	1.59537	0.807292	4.59619	4.54377	2.29777	1.30925	0.574522	0.0981803	0.513201	low
TCGA-R3-A69X	1.1863	0	0.150262	0.126057	0.247668	0.0494302	0.420553	0.283506	0.841066	0.971071	0.868289	1.42685	0.0394462	1.08607	high
TCGA-FD-A6TD	1.05753	1	0.284701	0.544552	0.183871	0.168579	0.433269	0.368335	1.07951	1.17083	1.90609	0.331583	0.0137799	0.771589	high
TCGA-4Z-AA7M	1.35616	0	0.889269	0.413179	0.0966413	0.202523	0.879483	3.76126	5.1716	3.97862	4.70245	0.656736	0.260663	0.499634	low
TCGA-ZF-AA56	0.709589	1	0.437714	0.468184	0.380973	0.0539962	0.38762	0.575147	1.21937	1.06077	1.14474	0.3789	0.0143633	0.756561	high
TCGA-XF-AAML	0.635616	1	0.33044	0.249489	0.341792	0.733734	0.650273	0.400792	1.0292	1.6016	1.08641	0.715101	0.0816629	0.821076	high
TCGA-UY-A9PA	2.93699	0	1.6863	0.578721	0.278457	0.151288	0.884922	0.185938	0.889699	2.29662	3.5739	0.120638	0.125446	0.803276	high
TCGA-G2-AA3F	2.44658	0	0.530683	0.961623	0.0910393	0.314231	2.67348	2.01682	5.36724	6.89025	2.12543	0.300683	0.056378	0.474273	low
TCGA-UY-A9PF	0.320548	0	0.964132	0.776469	0.0875637	0	0.834819	0.85756	2.4471	0.962927	0.806867	0.394531	0.0383604	0.845276	high
TCGA-YC-A89H	1.56986	0	0.165306	0.61018	0.316948	0.54379	0.910857	0.133667	1.70557	1.55388	1.15285	0.641758	0.038423	0.762851	high
TCGA-XF-AAMQ	5.96438	0	0.667494	0.470374	0.168396	0.131747	0.63051	1.10646	1.28614	2.17645	1.11723	0.288903	0.0214928	0.75641	high
TCGA-FD-A3B4	1.39726	1	4.74986	0.474371	0.327155	0.0372026	0.227499	0.365786	1.16684	1.61674	1.75769	0.409384	0.0654072	1.50924	high
TCGA-DK-A1AB	1.39178	1	1.06388	0.428401	0.372177	0	0.483857	0.0860256	0.784835	0.687533	0.339179	0.312559	0.0269103	0.927557	high
TCGA-BT-A20X	0.687671	1	0.28482	0.184324	0.143709	0.160618	0.160142	0.0658017	0.947719	1.14742	0.681032	0.435464	0.0233655	0.951871	high
TCGA-GV-A3JW	1.77808	0	0.569589	0.882156	0.614579	0.778312	3.08102	0.95657	7.45902	5.12247	2.30483	0.620629	0.0106034	0.466936	low
TCGA-UY-A8OD	9.40274	0	0.255453	0.546471	0.270673	0.315126	1.92704	0.929519	1.56163	2.06358	2.93953	0.804104	0.109759	0.679522	low
TCGA-2F-A9KT	6.44384	0	0.607709	1.14708	0.0766568	0.599734	0.398637	1.47418	5.3198	5.48932	1.72555	0.585832	0.238988	0.58356	low
TCGA-ZF-AA5H	2.45753	0	0.11548	0.290634	0.178686	0.151953	0.0404007	0.498015	1.0068	1.26644	1.67976	0.411972	0.125051	0.809064	high
TCGA-BT-A2LA	1.43014	0	0.337874	0.963717	1.23123	0.481635	1.82232	0.212493	20.1058	2.5364	0.314179	0.389967	0.111333	0.389559	low
TCGA-4Z-AA87	3.98356	0	0.195937	0.493121	0.232327	0.531755	3.53452	1.14865	12.5352	2.07203	2.04971	0.770953	0.0225035	0.596573	low
TCGA-XF-A8HB	3.75342	0	0.536504	0.720127	0.08121	0.308854	4.24661	0.614576	2.30067	3.1257	0.721594	0.619222	0.0130204	0.740083	high
TCGA-E7-A7PW	1.13973	0	0.215433	1.19281	0.521757	2.55127	1.41317	0.754865	4.90674	3.71263	3.90634	0.56511	0.139913	0.409434	low
TCGA-4Z-AA7S	2.91507	1	0.687792	1.44249	0.306547	0.45251	2.61678	0.648842	1.38823	4.41118	2.22703	0.433001	0.0218642	0.537756	low
TCGA-CF-A3MH	1.09041	0	0.582536	0.541325	0.434106	0.840226	1.9988	1.08702	1.602	2.3167	1.44647	0.380842	0.0558763	0.609789	low
TCGA-4Z-AA86	0.852055	1	0.563741	0.240102	0.0918969	0.128387	0.27308	0.666231	1.18119	1.4267	0.725824	0.464106	0.0743511	0.926773	high
TCGA-5N-A9KI	0.208219	1	0.0528728	0.532267	0.208085	0.156537	0.679782	0.342024	1.74703	1.52207	0.663726	0.690688	0.0379529	0.825343	high
TCGA-XF-A9SL	5.53425	1	0.180271	0.393201	0.497237	0.415112	0.804112	0.291535	1.31593	1.48273	0.969852	0.79443	0.0372183	0.767126	high
TCGA-CF-A9FL	1.54795	1	0.420544	0.695518	0.933639	0.83005	3.16848	0.437211	1.67362	2.4001	1.22104	0.425498	0.130606	0.498401	low
TCGA-CF-A9FM	1.09041	0	0.555365	0.683323	1.0835	0.791667	1.79722	0.548863	2.39707	2.10267	1.54925	0.427327	0.0622653	0.484131	low
TCGA-G2-AA3D	5.86027	0	0.808345	0.782458	0.332563	0.429551	3.4099	1.30726	3.13239	5.58924	1.85849	0.401245	0.00663135	0.538245	low
TCGA-DK-A2I2	0.649315	1	0.26056	0.367226	0.0578463	0.102856	0.177755	0.0421379	0.979907	0.398005	0.311512	0.385485	0.0220166	0.977294	high
TCGA-FD-A62S	1.11233	1	0.530979	0.413048	0.131521	0.238187	0.126656	0.390319	1.41942	1.33288	0.894507	0.850892	0.0661311	0.976189	high
TCGA-MV-A51V	1.12329	0	0.39658	0.532313	0.486909	0.326146	2.72283	1.49649	3.15577	1.78626	3.2794	0.530544	0.0661522	0.534934	low
TCGA-DK-A3X2	1.49863	1	0.0991674	0.324451	0.680491	0.0978659	5.17802	0.601402	0.84028	0.669999	1.68947	1.27203	0.00223721	0.688054	low
TCGA-DK-A1AD	9.36986	0	0.419514	0.168929	0.440276	0.621013	1.45299	0.542752	1.59718	1.72525	1.0031	0.303722	0.0373406	0.715406	low
TCGA-K4-A5RI	0.975342	1	0.106452	0.830526	0.36524	0.0525276	0.893812	0.258232	1.75459	1.18827	1.01815	0.192674	0.0227056	0.661324	low
TCGA-GV-A3QF	1.69041	1	0.774212	0.640216	0.0948693	0	4.4111	1.25206	2.52051	3.89871	3.27269	0.49611	0.002722	0.622593	low
TCGA-CU-A3QU	0.432877	0	0.129536	0.195604	0.213506	0.468732	0.577804	0.768115	2.22194	0.634186	1.21312	0.632009	0.0471113	0.819995	high
TCGA-DK-A6AW	4.4411	0	0.248518	0.687998	0.821322	1.83942	3.86355	0.653093	1.54327	2.22656	2.37692	0.205347	0.0443426	0.420001	low
TCGA-GV-A6ZA	1.89315	0	1.29463	1.5995	0.380058	1.10342	1.65215	3.18812	4.48085	5.22047	4.04538	0.296378	0.0263103	0.341849	low
TCGA-XF-AAMJ	4.57534	1	0.409633	0.536088	0.281092	0.565961	1.52625	0.264984	2.2379	1.73275	1.76305	1.22496	0.0977897	0.866088	high
TCGA-GU-A763	2.73151	0	0.309315	1.05093	1.26026	0.877611	7.94356	0.250113	2.83935	1.40835	0.832054	0.38946	0.0185555	0.367101	low
TCGA-G2-A2EC	1.90685	1	0.366933	0.438649	0.416566	0.452647	1.86539	0.407966	0.830526	2.39825	0.630611	0.765198	0.105356	0.765437	high
TCGA-FD-A3B7	0.334247	1	0.176653	0.266754	0.213919	0	0.0463515	0.142842	1.56519	1.6346	0.607193	0.695078	0.06304	0.933051	high
TCGA-FD-A5C0	1.50685	1	0.488527	0.491797	0.169806	0.32141	0.170911	0.438916	1.87756	0.861029	0.843639	0.59802	0.00601152	0.887588	high
TCGA-FD-A5BS	4.49041	0	0.101435	1.02114	0.143306	0.200209	0.665383	0.328084	1.49922	1.13227	0.848897	0.447012	0.042855	0.738142	high
TCGA-BT-A20W	0.69589	1	0.782204	0.944927	0.37099	1.15791	2.79126	0.316246	3.15354	2.38963	1.63653	0.492438	0.213041	0.631789	low
TCGA-PQ-A6FI	1.01918	0	0.404869	0.346442	0.0735415	0	0.201841	0.622019	0.585865	1.07037	1.96037	0.350469	0.0375317	0.852006	high
TCGA-FJ-A3Z7	2.58904	0	0.343416	0.395102	0.321796	3.77642	0.81097	0.198348	3.75836	1.81581	3.07928	0.555938	0.171852	0.594741	low
TCGA-XF-A8HC	0.547945	1	0.432526	0.544276	0.4001	1.28055	1.74016	1.63213	4.11121	3.00696	3.40428	1.59975	0.196338	0.638972	low
TCGA-ZF-AA4W	5.0137	0	0.0678866	0.341705	0.171265	0.0669957	0.712501	0.109786	1.48666	0.7179	1.09568	0.213691	0.0245042	0.819704	high
TCGA-LC-A66R	1.27671	0	0.76766	0.338099	0.222716	0.189397	1.23372	0.155183	1.11381	2.19863	2.52388	0.52859	0.0251903	0.847856	high
TCGA-E7-A8O7	1.27671	0	0.534867	1.30125	0.494768	0.747784	1.90631	0.648742	1.36239	2.85429	1.89173	0.336726	0.0665489	0.517096	low
TCGA-G2-AA3B	5.50137	0	0.123694	1.68105	0.54922	2.0752	7.59463	0.800154	4.00417	4.06954	1.15841	0.343934	0.00473544	0.336005	low
TCGA-DK-A1AA	1.58356	0	0.754699	0.284907	1.62218	0.521357	1.06932	0.427176	2.25133	0.908941	0.496254	0.421671	0.0551022	0.487364	low
TCGA-DK-AA6R	13.811	0	0.475663	0.418991	0.576005	0.0586776	0.218414	0.0480778	1.78978	0.838357	1.1729	0.318171	0.0287784	0.748398	high
TCGA-BT-A3PH	0.389041	1	0.516143	0.259799	0.280459	0.195911	0.0625056	0.321042	2.23973	1.28291	0.806942	1.29351	0.0462508	1.04833	high
TCGA-G2-A3IB	0.60274	1	0.642995	0.215766	0.0994922	0	0.0337426	0.103985	1.21405	2.21619	0.896853	0.0809597	0.0560895	0.913902	high
TCGA-2F-A9KP	0.99726	1	0.748581	0.484451	1.01981	0.791525	1.38895	1.21061	4.50588	1.97906	1.88582	0.62275	0.0662357	0.503277	low
TCGA-DK-A3IT	1.77534	0	0.356731	0.76954	0.123424	0.251464	0.788926	0.824152	1.50248	1.25748	0.670197	0.64968	0.0963648	0.798863	high
TCGA-FD-A43P	2.27945	0	0.542302	0.818898	0.252577	0.247009	1.31347	0.708357	8.02491	1.81358	1.0972	0.571201	0.125081	0.693509	low
TCGA-DK-A3IV	0.805479	1	1.35084	1.4217	0.751807	0.282782	2.05147	0.595796	2.00826	5.89202	2.30015	0.56695	0.284768	0.5012	low
TCGA-GU-A762	0.635616	1	0.273159	0.494977	0.137826	0.377404	0.18635	0.0441753	1.59378	0.930788	0.914409	0.558895	0.0210643	0.900491	high
TCGA-XF-AAN0	4.70685	1	0.705409	0.16709	0.372672	0.450451	1.51338	0.905922	3.33617	2.99851	2.30681	0.751038	0.19267	0.73807	high
TCGA-CF-A47V	1.03836	0	0.299518	1.80914	0.876529	1.675	4.68918	0.807304	2.91649	6.92137	2.08885	0.227846	0.0528283	0.282607	low
TCGA-XF-A9SI	6.63836	0	0.243587	1.10348	0.522345	0.300487	0.319569	0.492412	1.36186	4.90142	0.873659	0.661324	0.0149872	0.586166	low
TCGA-GU-A42Q	0.942466	1	4.45747	0.855827	0.190128	0.0907005	0.204978	0.706001	1.82421	3.02373	2.25252	0.166348	0.0980156	1.20405	high
TCGA-BT-A42F	2.36712	0	0.397082	0.549642	0.0751322	0	0.14326	0.0401351	1.28669	1.60384	1.12748	0.406223	0.0191378	0.901748	high
TCGA-GD-A3OQ	0.260274	0	0.15757	0.218109	0.127207	0.155502	0.134369	0.382235	0.932775	0.856296	0.753532	0.334796	0.0434652	0.883327	high
TCGA-BT-A20U	1.24658	1	0.590704	0.339805	0.434297	0	0.24356	0.40941	2.12225	0.991539	0.958435	0.318754	0.035652	0.790019	high
TCGA-XF-A9SW	0.991781	1	0	0.866579	0.45171	0.453078	0.27104	0.278424	1.16349	0.809168	0.823319	0.993537	0.0447248	0.750086	high
TCGA-FD-A3B3	2.66849	1	0.477081	0.583191	0.137553	0.0672601	0.116238	0.16533	0.777907	1.06108	1.48705	0.407615	0.0364821	0.870625	high
TCGA-ZF-A9RC	7.85753	0	0.074042	0.633569	0.276455	2.04597	5.01233	1.13754	3.89608	2.78398	3.45231	0.384559	0.041304	0.4522	low
TCGA-E7-A6MD	0.353425	0	0.495152	0.591929	0.84944	0.122164	0.94193	0.400381	1.60448	1.63632	1.84993	0.224052	0.0751476	0.563821	low
TCGA-ZF-A9R4	2.52329	0	0.208403	1.12766	0.46267	0.462753	1.21668	1.13748	2.06421	4.37711	1.30807	0.385401	0.0553501	0.495975	low
TCGA-GV-A3QH	0.706849	1	0.316047	1.19311	0.0916925	0.584811	2.4256	2.42778	4.99521	3.29577	2.03094	0.379282	0.127043	0.465348	low
TCGA-FT-A3EE	0.271233	1	0.722608	0.121241	0.100265	0.118854	0.647809	0.170421	1.35133	0.884442	0.773922	0.834018	0.0634789	1.12007	high
TCGA-ZF-A9RL	7.40548	0	1.55898	1.22824	0.191521	1.20406	4.32176	0.876936	3.52996	3.38485	2.30954	0.821439	0.010565	0.657923	low
TCGA-ZF-A9R9	2.36712	1	0	0.339866	0.357721	2.58211	2.25888	0.477731	1.18214	2.38012	1.41269	0.544636	0.102821	0.602942	low
TCGA-DK-A1A7	1.53425	0	0.214305	0.345183	0.142732	1.98803	2.0468	0.519862	2.05634	1.25904	0.333075	0.236103	0.00808713	0.707089	low
TCGA-FD-A3SR	1.64932	1	0.160798	0.512603	1.11422	0.423168	0.618806	0.69345	5.22603	1.98385	0.576727	1.02075	0.064857	0.557334	low
TCGA-GU-AATP	2.74795	0	0.236678	0.833919	0.230877	2.49144	0.972919	0.637929	5.23189	2.36382	2.68812	0.856757	0.101611	0.596685	low
TCGA-CF-A1HR	1.06575	0	0.210841	0.247628	0.134751	0.485506	0.387253	0.96609	2.13187	0.825794	1.05029	1.12825	0.0158552	0.928705	high
TCGA-E7-A3X6	2.47671	1	0.574824	0.210426	0.490422	0.206284	0.56217	0.380294	1.50427	1.53504	0.68723	0.518149	0.0456559	0.812456	high
TCGA-K4-A3WS	2.08493	0	0.963439	1.14104	0.268793	0.503362	0.75838	1.4206	7.07815	4.62805	1.82939	0.677892	0.189688	0.584181	low
TCGA-DK-A1AF	1.46849	0	0.611999	0.250289	0.239314	0.150992	0.140508	0.216503	0.500217	1.37078	0.983188	0.535788	0.0431458	0.938744	high
TCGA-LT-A5Z6	1.29863	0	1.19749	3.51605	0.362525	0.919157	8.04714	3.49661	5.1995	4.612	3.61891	0.869058	0.196202	0.221627	low
TCGA-GC-A4ZW	0.0410959	0	0.19022	0.478734	0.697441	0	1.46406	0.358896	1.08435	0.819533	4.51045	1.5568	0.00624198	0.720483	low
TCGA-K4-A4AB	0.208219	0	0.464361	0.175301	1.09535	0.286417	0.167533	0.375483	1.92692	1.39816	0.728656	0.557272	0.0469037	0.628904	low
TCGA-DK-AA74	4.67945	0	0	0.246776	0.089054	0.290302	0.437378	0	0.508372	0.633675	0.117228	0.78706	0.016088	1.02811	high
TCGA-G2-A2EO	4.94247	1	0.282692	0.341501	0.136931	0.167389	0.118679	0.137151	1.82003	0.664327	0.304175	0.658487	0.0192485	0.982658	high
TCGA-DK-A1AG	1.30137	0	0.524834	1.10473	1.39628	1.22424	2.42869	1.11882	3.52593	3.16749	1.6257	0.345429	0.0835664	0.325764	low
TCGA-GV-A3JZ	1.65205	0	0.497406	0.308145	0.250973	0.604159	0.250986	0.680653	2.75058	1.75336	1.32658	0.283033	0.0849064	0.752866	high
TCGA-UY-A78K	1.46849	1	0.354104	1.12035	0.153144	0.698915	0.730025	1.14532	2.43872	1.57513	1.5422	0.644896	0.0365192	0.652041	low
TCGA-FD-A6TH	0.358904	1	0.368852	0.297057	0.0930544	0.0364011	0.261311	0.98424	0.887674	0.801792	1.1245	0.806935	0.0994013	0.927922	high
TCGA-DK-AA6W	1.13699	1	0.935955	1.58158	0.640908	0.725743	3.56094	0.432466	6.8029	3.02431	2.87738	0.294616	0.155758	0.435404	low
TCGA-CF-A3MG	1.01096	0	0.125415	0.189381	0.177183	0.309422	0.246803	0.304232	1.07724	1.84203	0.674727	0.779681	0.010803	0.92724	high
TCGA-DK-A3X1	5.50411	0	0.447008	0.421875	0.124049	0.165428	1.01162	0.135544	3.03531	2.2979	1.10224	0.272621	0.0579857	0.821698	high
TCGA-DK-A1A6	5.53425	0	0.300361	0.475156	0.203511	0.211728	0.112587	0.485745	0.760365	0.831893	0.743842	0.749619	0.0212964	0.89591	high
TCGA-XF-AAMG	9.21644	0	0.443202	0.350561	0.913661	0.749805	3.95387	1.58709	4.44378	4.76126	4.3525	1.00646	0.33398	0.421606	low
TCGA-E7-A541	2.13151	1	0.383081	0.867701	0.508992	0.378053	3.41752	0.980907	3.33491	2.92578	1.9083	0.442144	0.0364023	0.518435	low
TCGA-UY-A78N	7.23562	1	0.368916	0.882039	1.27041	1.09222	3.24275	0.745765	4.43914	3.63036	1.84692	0.500792	0.10933	0.364506	low
TCGA-ZF-AA5P	1.01918	0	0.309295	0.71614	0.262178	0.0610472	1.07124	0.150058	3.13056	1.59905	1.51609	0.866492	0.0208061	0.815447	high
TCGA-GC-A3WC	1.47945	0	3.00897	0.657259	0.870823	0.168084	0.431997	1.05585	3.20705	4.33603	1.56112	0.214449	0.0686971	0.702038	low
TCGA-FD-A3SL	1.95068	1	0.270982	0.190957	0.388306	0.213941	0.284408	0.26294	0.897481	0.509446	0.356369	0.63121	0.0184511	0.891478	high
TCGA-K4-A5RH	0.756164	0	0.472017	0.445477	0.288771	0.291139	0.131592	0.262401	1.54321	1.07458	1.7635	0.49217	0.0257746	0.817077	high
TCGA-FD-A5C1	4.90959	0	0	1.49984	0.0346953	0.226203	0.872056	0.231675	0.456723	1.5486	1.43867	0.965006	0.0152779	0.756529	high
TCGA-XF-AAN7	1.54795	1	0.34026	0.342537	0.274692	0.223863	0.178559	0.366846	1.2024	1.79912	0.677995	0.410571	0.0214004	0.822189	high
TCGA-2F-A9KO	2.01096	1	1.81623	1.44161	0.317216	0.482568	0.659844	1.46861	1.52436	2.54447	4.55157	0.692643	0.0120343	0.610667	low
TCGA-DK-A3IM	0.679452	1	0.75494	0.259998	0.308741	0.35291	0.417023	0.128515	2.09078	0.980429	0.855064	0.500289	0.000977879	0.917137	high
TCGA-FD-A3SS	1.07123	1	0.570569	0.307708	0.180958	0.643522	0.641613	0.3625	2.53558	0.957742	1.53482	1.32136	0.257607	1.02609	high
TCGA-UY-A9PE	0.517808	0	0.100564	0.354332	0.28415	0.496223	1.92623	0.650533	3.37734	2.2451	1.50287	1.50363	0.0853866	0.849126	high
TCGA-UY-A9PD	1.48493	0	0.179006	0.855968	0.912227	0.441641	4.46202	1.73693	6.7874	3.15497	1.76558	0.563467	0.0594739	0.372431	low
TCGA-DK-A3IQ	1.47671	1	0.283282	0.213883	0.204871	0.139782	0.433588	0.496302	0.884145	1.27595	1.24182	0.772809	0.0885031	0.910446	high
TCGA-E7-A4XJ	0.186301	1	0.227877	1.45288	0.122643	0.824583	4.80328	0	5.04321	2.54367	1.49841	0.753167	0.0654294	0.610509	low
TCGA-FD-A43Y	1.29863	1	0.896541	0.798403	0.0417564	0.0680597	0.162859	0.66918	1.63301	1.33705	1.69024	0.20623	0.00933503	0.812928	high
TCGA-S5-AA26	1.37808	0	1.9936	2.20764	0.563303	0.865674	14.1654	2.38581	7.86157	7.9176	4.05187	0.439277	0.173033	0.23631	low
TCGA-YC-A9TC	0.0547945	1	0.0523589	1.47586	0.343438	0.87842	3.02242	0.296362	3.50872	3.35293	1.40845	0.304905	0.0259867	0.488287	low
TCGA-K4-A6FZ	0.150685	0	0.641289	0.624062	0.276114	0.0843831	0.818893	0.449408	1.13144	1.93402	1.50783	0.423911	0.031916	0.771687	high
TCGA-KQ-A41R	3.69863	0	0.0861717	0.693988	1.05219	2.46618	4.72555	0.278714	2.42721	3.03755	2.16347	0.664557	0.0134314	0.39588	low
TCGA-DK-AA6M	4.33425	0	0.165676	1.70955	0.292579	0.163502	0.912895	0.066983	0.910247	0.973347	1.337	0.469358	0.0336388	0.622449	low
TCGA-ZF-AA52	2.95068	1	0.357972	0.540552	0.390138	0.353274	2.17911	0.40524	0.731297	1.76659	1.71189	0.788767	0.0616699	0.739835	high
TCGA-K4-A5RJ	1.47671	0	1.01651	0.584753	0.659436	0	0.0571542	2.99426	3.85434	1.87692	1.95315	1.737	0.0425888	0.666039	low
TCGA-HQ-A5ND	0.750685	1	1.08978	0.433056	0.214157	0.113208	0.165546	0.278273	1.09185	2.56098	1.40575	0.234709	0.0202329	0.868047	high
TCGA-BT-A3PK	0.830137	1	0.433802	0.174682	0.140083	0.0856218	0.364236	0.140309	0.92873	1.29128	0.622358	1.00592	0.0330963	1.09361	high
TCGA-FD-A3N6	2.33151	0	1.63467	0.880211	0.218666	0.0375167	0.66831	0.368874	1.75327	1.16138	0.613568	0.586353	0.0927798	0.972984	high
TCGA-UY-A78P	6.52055	0	0.0576222	0.348047	0.186074	0.113732	0.302386	0.232967	0.851656	1.42183	0.895571	0.199519	0.0196175	0.799149	high
TCGA-BT-A20Q	1.62466	1	0.575147	0.318448	0.574591	0.624359	1.3582	0.372052	1.04144	1.11507	0.790758	0.706065	0.041049	0.772955	high
TCGA-SY-A9G5	3.24932	0	0.476921	2.05763	0.295639	0.605137	0.357536	0.661096	1.56583	3.24221	3.09527	0.482539	0.0360506	0.486567	low
TCGA-4Z-AA7Q	1.39726	1	0.143843	1.62907	0.355632	0.425866	0.943563	0.232624	1.36354	3.50708	2.32162	0.373547	0.00796522	0.517147	low
TCGA-FD-A5BT	0.89863	1	0.0659824	0.464968	0.0466091	0.130233	0	0	0.566751	1.35676	0.118328	0.30116	0.0763224	0.911616	high
TCGA-CF-A27C	1.16438	0	1.60255	0.784231	0.539057	0.702897	2.14916	3.85148	3.42402	4.28904	3.93829	0.469413	0.00712112	0.396852	low
TCGA-E7-A6MF	2.05479	0	0.519881	0.72689	1.75458	0.570065	1.22769	1.26113	2.35566	3.32579	1.4848	0.781864	0.0959602	0.352915	low
TCGA-FD-A6TF	0.189041	1	0.101793	0.435517	0.159219	0.100457	0.600957	0.452707	3.89123	1.52499	1.24741	1.12147	0.0137787	0.90303	high
TCGA-XF-AAMR	7.64384	0	1.01539	0.562202	0.468779	0.275567	1.30548	1.25209	1.57932	1.93876	1.16842	1.06673	0.0488337	0.782199	high
TCGA-XF-A8HF	8.09315	1	0.0574892	0.607677	0.203048	1.02123	1.73471	0.418373	4.9291	1.58742	0.859139	1.14006	0.0514065	0.793011	high
TCGA-ZF-AA4U	0.717808	1	0.566547	0.823823	0.908394	0.807606	0.445963	1.01802	1.38829	1.88613	1.65571	0.445839	0.0191073	0.502507	low
TCGA-E7-A97Q	0.673973	1	0.93706	1.9751	0.431435	0.635774	2.52019	2.69934	5.27976	4.33537	4.41118	1.50247	0.679363	0.409164	low
TCGA-FD-A43S	1.24658	0	0.0558396	1.34912	0.34373	1.21235	1.15747	0.22576	1.62469	2.82129	1.56883	0.448213	0.0350436	0.549537	low
TCGA-XF-A8HG	1.27945	1	0.871541	0.971379	0.345515	0.491488	0.767714	0	3.39135	2.52358	3.31197	0.881808	0.261478	0.741287	high
TCGA-K4-A83P	1.35616	0	1.11339	0.433054	0.398351	0.649281	0.557721	0.450147	2.40456	2.40835	2.11769	0.51774	0.0327988	0.775002	high
TCGA-GD-A2C5	2.22466	0	0.427953	0.622292	0.0863717	0.797748	0.536493	1.23038	2.49473	2.06725	1.56334	0.508902	0.0772367	0.710105	low
TCGA-XF-AAMX	0.564384	1	0.346899	0.488909	0.392072	0.616224	0.655356	0.729308	3.1622	1.10054	4.93534	2.05287	0.00654539	0.841431	high
TCGA-DK-A1AE	1.34521	0	1.40939	0.53206	1.08932	0.0632226	0.504281	0.259009	2.75381	1.50549	0.631874	0.433561	0.0189198	0.670059	low
TCGA-DK-A2I1	1.49589	0	0.234632	0.118101	0.284128	0.648348	0.467889	0.227669	2.13156	0.854648	0.532977	1.20386	0.165535	1.01034	high
TCGA-DK-A6B0	6.38356	0	0.0992332	1.04892	0.921276	1.61586	0.950367	0.481441	1.72391	2.09878	0.800807	0.226463	0.0268643	0.437632	low
TCGA-FD-A5BR	2.2274	0	0.575326	0.482648	0.490264	0.693948	0.838655	0.67197	3.37363	2.74159	2.82775	0.593602	0.0115372	0.633928	low
TCGA-KQ-A41P	2.99726	0	0.402233	1.38832	0.324723	0.396955	2.62344	0.418174	3.42382	3.07206	1.78616	0.488366	0.128219	0.559764	low
TCGA-UY-A9PH	4.27671	0	0.960123	1.0632	0.184088	1.32653	2.39327	0.698722	2.54094	1.63581	1.43484	0.785782	0.116572	0.72187	low
TCGA-FD-A3SJ	2.02466	1	0.298207	0.243915	0.267074	0.294294	0.596623	0.663111	4.04406	1.97096	1.44837	0.891751	0.0116203	0.828683	high
TCGA-DK-A3IU	1.93425	1	0.0835236	0.441434	0.463571	0.206069	0.0876618	0.371455	0.956559	0.515236	0.474318	1.32771	0.0928438	0.914605	high
TCGA-YF-AA3M	1.13699	0	0.463021	0.652568	0.897112	0.182778	2.21113	0.22464	1.07489	2.39382	2.71246	0.422669	0.0151938	0.530747	low
TCGA-4Z-AA7Y	4.16986	0	0.658296	0.903685	1.06289	0.118119	0.298349	0.822645	0.703903	1.44152	1.71714	0.527459	0.0321569	0.519947	low
TCGA-FD-A3SP	2.14521	0	0.244883	0.221869	0.172982	0.193335	0.295568	0.514833	1.00433	1.03585	1.34674	0.616665	0.0580578	0.884695	high
TCGA-GC-A6I3	0.003	0	0.14371	1.22971	0.0797616	2.19827	2.92233	0.639122	3.13044	2.06852	1.15973	0.316655	0.0153262	0.54493	low
TCGA-4Z-AA80	0.0520548	1	0.343786	0.415305	0.0346924	0.40713	0.432984	1.38993	2.8944	0.807898	1.27414	0.389577	0.00253826	0.763938	high
TCGA-G2-A3IE	1.67671	1	0.194507	0.758758	0.191374	1.58362	2.19455	1.53347	1.5089	3.91384	1.33712	0.558687	0.263483	0.549781	low
TCGA-DK-A6B5	4.22466	0	0.524616	0.308074	0.70587	0.949173	4.01485	4.77231	5.25379	1.66948	1.96001	0.467886	0.0885853	0.330494	low
TCGA-GV-A3QK	2.27945	0	0.117529	0.985961	0.506031	1.04388	4.8724	2.24914	3.10127	3.4524	2.29502	0.376118	0.0369594	0.368563	low
TCGA-KQ-A41O	4.2137	0	0.25321	1.30639	0.268297	0.999549	4.01956	1.33085	9.03281	4.50002	3.40566	0.647599	0.117624	0.419891	low
TCGA-E7-A677	2.24658	0	1.09772	2.27919	0.733873	0.541655	5.84152	0.776663	2.97037	3.50669	2.50171	0.31854	0.116083	0.354562	low
TCGA-DK-A6B1	5.6137	0	0.254785	0.448859	1.157	1.13149	2.25069	1.06444	2.9508	2.2453	1.72611	0.354218	0.0475511	0.413113	low
TCGA-CF-A5U8	1.09315	0	0.119982	0.785101	0.629598	1.48009	2.95927	1.6493	4.42404	3.70069	1.50616	0.500417	0.0310049	0.418554	low
TCGA-GU-AATO	0.887671	1	0.173087	1.13259	0.427932	0.170815	1.47601	0.139958	1.25902	1.52533	1.2416	0.9126	0.0472129	0.700367	low
TCGA-FD-A6TG	0.254795	1	0.279952	0.164399	0.503804	0.368371	0.477462	0.45274	1.43339	1.80919	0.474154	0.64623	0.0369373	0.789144	high
TCGA-4Z-AA7O	1.40274	0	0.404284	0.732582	0.236624	0.718161	0.59404	0.523047	2.72174	2.37517	1.64336	0.534487	0.0835779	0.705308	low
TCGA-GV-A3QI	3.0411	0	0.591349	0.714369	2.21989	0.272342	0.920629	1.94454	11.8244	1.71393	0.801252	1.4395	0.0349286	0.31493	low
TCGA-GD-A6C6	0.183562	0	0	0.226254	0.0194401	2.53486	0.522318	0	0.57144	2.37673	0.307085	0.222345	0.0210716	0.778135	high
TCGA-GC-A3RD	1.1726	0	0.273327	0.577828	0.193075	0.53948	4.58991	0.53043	3.6929	1.99119	1.3071	0.91199	0.138572	0.730486	high
TCGA-BT-A20R	0.421918	1	0.297836	0.224872	0.155286	0.0979759	0.195371	0.722493	1.28296	0.758241	1.2166	0.757826	0.0997693	0.919615	high

## Sheet: S7
Table S7: testRisk
id	futime	fustat	ATP1B3-AS1	AL136295.2	BDNF-AS	AC073534.2	AL022322.1	AC104564.3	TMEM147-AS1	AL022328.2	AC132872.3	AC097359.2	KCNQ1OT1	riskScore	risk
TCGA-ZF-A9R7	1.82192	0	0.605742	5.6624	0.3231	1.70798	2.77007	2.79888	3.58918	6.30405	3.00023	0.394966	0.160437	0.142238	low
TCGA-FD-A3SO	0.460274	1	0.328149	0.412932	0.0551905	0.107947	0.143503	0.176895	2.35307	1.09246	1.4385	0.611153	0.103418	0.937332	high
TCGA-E7-A97P	1.19726	1	0.117468	0.975594	0.557135	0.115926	0.909246	0.0949845	0.790821	1.1387	0.386205	0.258832	0.00770926	0.633177	low
TCGA-4Z-AA81	3.47945	1	0.202928	0.238334	0.075086	0.26702	0.319474	0.765745	1.10445	1.15246	0.808702	0.2768	0.012763	0.83314	high
TCGA-E7-A85H	1.07945	0	0.24064	0.702526	0.247692	0.759941	2.90447	0.505913	4.16743	1.32893	1.6111	0.598406	0.052314	0.669242	low
TCGA-FD-A6TC	0.512329	0	0.205811	0.284884	0.919022	0.304664	0.945033	0.166419	1.26214	1.8137	2.06072	0.542568	0.056772	0.601143	low
TCGA-DK-A2I4	10.5068	0	0.656905	0.602951	0.366544	0.419478	0.314309	0.374947	0.720629	1.06699	1.01635	0.529108	0.0838463	0.803906	high
TCGA-4Z-AA7R	1.43014	1	1.08974	0.548516	0.162058	0.28301	3.50644	2.50436	2.35226	3.2348	3.56565	0.379131	0.0529329	0.547419	low
TCGA-CF-A3MI	1.0137	0	0.154039	0.620281	0.113993	0.810761	0.781411	0.415188	1.14828	2.08146	0.920807	0.12122	0.112467	0.706427	low
TCGA-G2-A2EL	2.24384	1	0.90787	1.09276	0.876322	1.01282	6.76318	0.446847	2.68489	4.38294	1.01462	0.198801	0.033839	0.413105	low
TCGA-UY-A8OB	5.77808	0	0.148222	0.335732	0.0822661	0	0.330578	0.299632	1.08389	0.696644	0.398715	0.396583	0.0136795	0.918714	high
TCGA-2F-A9KQ	7.90685	0	0.552857	0.278279	0.725272	0.327361	2.50958	0.625858	2.74228	1.8189	1.15669	0.513377	0.0936564	0.636747	low
TCGA-GV-A40G	1.58904	0	0.423496	0.596863	0.418813	1.58817	3.66695	2.08888	5.56452	5.37416	4.253	0.42658	0.0152865	0.383151	low
TCGA-G2-A2ES	2.75068	1	0.590064	0.275792	0.110583	0	0.0995303	0.238564	0.574017	1.31237	0.781034	0.271974	0.0217829	0.944112	high
TCGA-UY-A8OC	0.003	1	0.492074	0.433447	0.173797	0.364212	0.258227	0.298419	0.33318	1.40933	1.2869	0.842231	0.00731666	0.939314	high
TCGA-E7-A7XN	1.1726	0	0.753217	0.495785	0.0526216	0	0.258445	0.234251	1.42576	3.09761	1.4893	0.510665	0.0116452	0.914944	high
TCGA-DK-A2HX	3.89041	1	0.230939	0.15499	0.310729	0.379848	0.100992	0.560214	1.11095	0.768836	0.782281	0.739057	0.0445216	0.88179	high
TCGA-BL-A0C8	3.33973	0	2.1649	1.21652	0.283444	18.1596	3.27232	1.52656	3.06087	2.91363	1.21795	1.35722	0.469906	0.290972	low
TCGA-4Z-AA89	2.81918	0	0.350803	1.37729	1.06909	0.830877	1.49114	1.13464	2.06852	4.24559	3.98431	0.64046	0.0797163	0.343548	low
TCGA-FD-A3NA	5.05479	0	0.127747	0.514409	0.137507	0.504283	1.07261	0.206593	1.68051	0.650446	0.661821	0.482541	0.0433168	0.834646	high
TCGA-ZF-A9RM	3.9863	0	0.766165	0.495831	0.226424	0.162023	1.32106	1.06204	3.58689	2.66858	1.34127	0.783803	0.159827	0.78474	high
TCGA-CF-A47W	1.00822	0	0.23104	0.860568	0.433655	2.28008	2.01264	0.112091	3.35398	2.60613	0.414329	0.327266	0.0263455	0.565744	low
TCGA-GC-A3I6	1.72603	1	1.14057	0.652392	0.167416	0.102328	1.6596	0.29345	0.886614	0.852839	1.11568	0.644614	0.00978214	0.952726	high
TCGA-ZF-AA51	4.69589	0	0.668778	0.294549	0.303696	0.907502	1.60124	0.540775	2.4776	2.5539	1.94892	0.539445	0.0912112	0.739837	high
TCGA-CU-A0YO	0.408219	1	0.786379	0.213135	0.45782	0.0596969	0.0793598	0.0978258	0.599155	0.888457	0.578557	0.476026	0.0630227	0.919233	high
TCGA-K4-AAQO	0.983562	0	0.77196	0.291423	0.402486	0.317429	0.286949	0.780261	2.61843	1.8519	1.1921	0.46574	0.158322	0.774833	high
TCGA-FD-A62N	0.224658	0	0.239903	1.14717	0.296563	0.295944	0.314737	0.242483	0.691518	1.44467	0.788744	0.575808	0.00861031	0.718608	low
TCGA-DK-AA77	1.69315	0	0.484338	0.639948	1.03861	0.298739	2.25574	0.881182	2.54389	3.27231	1.37524	0.514545	0.0374982	0.47718	low
TCGA-4Z-AA82	4.26301	1	0.599782	0.271709	0.193682	0	0.503599	0.242492	3.5227	1.76186	1.0756	0.387034	0.0905349	0.881364	high
TCGA-E7-A678	2.1863	0	0.225042	1.58584	0.870534	1.11045	2.65716	0.485253	1.8343	2.60018	0.403574	0.377802	0.0178462	0.417473	low
TCGA-ZF-A9R1	2.11781	0	0.481119	0.544882	0.315581	0.712208	0.852115	0.680809	1.68466	2.40259	1.7256	0.64364	0.0503231	0.718527	low
TCGA-C4-A0F7	0.169863	1	0.702291	0.185165	0.404971	0.264028	0.0789736	0.16225	1.14383	1.13955	0.559748	1.20006	0.0277092	1.0583	high
TCGA-DK-AA6S	13.8356	0	0.55347	0.626821	0.27926	1.09241	0.344905	0.503479	3.53337	1.21936	2.27459	0.457325	0.0482422	0.701553	low
TCGA-BT-A42E	3.03562	0	0.890991	0.627868	0.0404605	0.219825	0.14027	0.576366	3.27153	1.5442	2.5299	0.392648	0.00730934	0.832117	high
TCGA-ZF-AA4R	2.83836	1	0.596508	0.90075	0.195634	0.515095	0.508676	0.783798	2.40604	2.32172	2.00575	0.469416	0.0896125	0.684629	low
TCGA-E7-A7DU	0.0767123	0	0.486197	0.636286	0.58876	0.383853	1.14814	0.864907	3.91279	3.48481	1.80194	0.275477	0.0143588	0.544294	low
TCGA-DK-A3WY	13.6082	0	0.479967	1.02005	0.392859	0.315779	0.195902	0.905572	2.57097	1.72321	0.860736	0.663083	0.0273435	0.672017	low
TCGA-K4-A3WV	1.76986	0	0.403793	1.04528	0.0582112	0.853916	1.52871	0.932881	2.66487	2.54174	2.82756	0.181578	0.145989	0.578135	low
TCGA-GU-AATQ	0.583562	1	0.668367	0.560701	0.191099	0.109933	0.818396	0.360295	3.40488	3.73032	0.865654	0.298047	0.0196475	0.766583	high
TCGA-BT-A20N	2.17808	1	0.632784	0.24773	0.0496656	0.277546	1.86327	0.341113	1.77366	1.8588	0.588407	0.763543	0.04672	0.995864	high
TCGA-XF-AAMW	0.693151	1	1.29902	0.373631	0.468167	0	0.316498	0.375138	1.60115	1.7989	3.16154	0.175242	0.030828	0.753099	high
TCGA-BT-A3PJ	2.16164	0	0.490012	0.452184	0.0618104	0.0402984	0.525004	0.363206	0.875278	0.911626	0.927569	0.7905	0.0388587	0.997951	high
TCGA-FD-A3SN	2.43014	0	0.161631	0.488138	0.255532	0.372189	0.537191	0.304955	1.55925	0.443138	0.837363	0.457898	0.0574581	0.804717	high
TCGA-H4-A2HO	0.126027	0	0.11653	0.439912	0.452734	1.78251	4.38764	0.329792	2.35352	0.958458	0.940391	0.247595	0.179482	0.574997	low
TCGA-FD-A6TB	1.56712	0	0.856672	0.539004	0.162092	0.158518	0.885069	0.865884	2.6475	1.82444	1.63231	0.901675	0.0568813	0.878502	high
TCGA-XF-AAN3	7.19178	0	1.29171	0.506918	0.636283	0.0432121	1.53953	0.495685	2.5802	1.99367	1.71444	0.282552	0.0422071	0.695276	low
TCGA-H4-A2HQ	1.61644	0	1.39269	0.905466	0.163963	0.801741	5.95336	1.50151	2.67627	3.57965	4.16257	0.264858	0.147812	0.518319	low
TCGA-FD-A3B6	2.75342	1	0.0999618	0.427681	0.181573	0.147975	0.603259	0.282903	1.60507	0.734094	1.49386	0.841704	0.0571983	0.886114	high
TCGA-DK-A6B6	3.05479	0	0.358229	1.40644	0.318118	1.48482	0.432375	0.695196	2.86076	2.31506	1.02787	0.529981	0.0575999	0.568129	low
TCGA-5N-A9KM	1.45205	1	0.295627	0.773775	0.0954638	1.34204	1.59791	0.86056	1.05688	1.52839	0.918934	0.679311	0.00897326	0.726006	low
TCGA-XF-A8HH	0.156164	1	0.955632	0.513082	0.45646	0.377236	3.74446	1.28788	8.01113	4.7909	3.99876	0.631701	0.207489	0.519012	low
TCGA-C4-A0EZ	0.747945	1	0.201152	1.59467	0.380601	1.09181	1.72853	0.325303	2.67338	3.13168	1.35274	0.324503	0.0470298	0.498146	low
TCGA-ZF-AA58	4.51781	0	0.155887	1.22929	0.304131	0.153841	0.436295	0.210084	2.81467	1.19059	1.58415	0.69515	0.0381519	0.689139	low
TCGA-FJ-A871	0.745205	1	0.09887	0.572308	0.199544	0.292718	0.505872	0.399732	1.38862	2.4977	1.12294	0.420146	0.0352824	0.740107	high
TCGA-ZF-A9RN	1.68493	1	0.125026	0.629312	0.756998	0	0.032805	0.505479	1.1126	1.3956	0.26158	0.344357	0.0484624	0.61922	low
TCGA-GC-A3RB	1.59452	0	0.362607	0.750348	0.203287	0.198805	0.750575	1.07509	1.1972	1.51489	0.891113	0.164869	0.0664347	0.670479	low
TCGA-XF-A9T2	1.57534	1	0.681252	0.57151	0.297903	0.448208	0.446878	0.918103	2.62705	2.00118	1.69681	0.446754	0.0223549	0.711855	low
TCGA-DK-A3WX	0.879452	1	1.18711	0.970987	0.0349401	0	0.311483	0.639936	1.89847	2.76066	2.27672	0.544943	0.0503162	0.83387	high
TCGA-YF-AA3L	0.99726	0	0.0608009	0.520267	0.95715	1.14006	0.462647	0.294983	1.59967	3.10769	0.908631	0.631577	0.0229442	0.537879	low
TCGA-BT-A2LB	1.34795	1	0.0856468	0.495766	0.108035	0.126784	0.426979	0.831051	1.5409	1.05667	1.22874	0.505492	0.0432107	0.787909	high
TCGA-DK-A2I6	7.27671	0	0.141623	0.196035	0.0321559	0.069882	0.325149	0.286291	1.6192	1.53926	0.634938	0.490373	0.00406636	0.946018	high
TCGA-ZF-AA4X	5.6	0	0.671932	1.71926	0.683714	0.828893	4.81903	2.12803	3.28005	4.57264	2.7447	0.784343	0.125863	0.343423	low
TCGA-DK-A6B2	1.30685	0	0.206092	0.466811	0.431543	1.37287	0.405568	0	1.49112	0.847553	0.739179	0.54331	0.0460715	0.750661	high
TCGA-XF-AAN2	5.12055	1	0.36671	0.646039	0.203531	0.180949	0.216495	0.815438	1.48269	1.7774	1.97289	0.663732	0.0612951	0.757955	high
TCGA-ZF-A9RD	1.11781	1	0.105677	0.638304	0.0533205	0	0.0554563	0.256351	0.55607	0.496681	0.75805	0.282748	0.00736891	0.854534	high
TCGA-E5-A2PC	3.63288	0	0.0728426	0.733302	0.323432	0.0718867	0.363146	0.206152	1.33027	1.21966	1.06681	0.395527	0.0515406	0.728071	high
TCGA-GD-A76B	0.613699	0	0.189225	0.666719	0.453509	0.466853	3.42585	0.306015	3.64235	1.77871	1.35736	0.53607	0.0227027	0.623518	low
TCGA-GC-A6I1	0.003	0	0.421931	0.667473	0.109487	0.297424	0.0632624	0.243696	0.741621	0.708242	0.432377	0.825344	0.0249712	0.969959	high
TCGA-XF-A9SK	1.33151	1	0.482862	0.972188	0.793551	1.0892	0.325791	0.501998	5.27913	1.53998	1.73185	0.901103	0.0823366	0.571316	low
TCGA-FD-A3SQ	3.89863	1	0.895776	0.68959	0.606178	0.41601	0.580686	0.894756	2.49949	2.16699	1.73241	1.60888	0.106339	0.807627	high
TCGA-G2-A3VY	1.46849	0	0.339597	0.427338	0.484058	0.795958	0.913334	1.61327	4.51009	2.24452	2.84203	1.05561	0.00748716	0.605886	low
TCGA-XF-AAN8	0.323288	1	0.444854	0.358265	0.341174	0.0878032	0.350171	0.143884	0.481933	1.14995	0.904136	0.518109	0.0594854	0.868061	high
TCGA-GC-A3BM	1.78356	1	0.782679	0.761653	0.537078	0.41195	1.46493	1.5189	1.98654	3.43335	1.59074	0.813016	0.12649	0.598726	low
TCGA-G2-A2EJ	4	0	0.446726	0.286183	0.0245892	0.160314	0.0319677	0.328385	0.971064	1.02595	0.606912	0.47299	0.0264862	0.991031	high
TCGA-FD-A43N	1.91507	0	0.67656	0.872645	0.140814	0.876332	1.1206	0.273534	3.49134	1.54023	3.13434	0.385999	0.028445	0.695294	low
TCGA-UY-A78O	6.33425	0	0.180015	0.664473	0.2301	1.42122	1.07063	0.291121	1.5973	1.97416	2.04456	0.387207	0.0278125	0.65704	low
TCGA-FD-A3B5	0.745205	1	0.200341	0.201682	0.105128	0.0395423	0.431047	0.194395	2.2386	0.918061	0.886213	0.447743	0.0558795	0.926899	high
TCGA-BT-A42C	2.39178	0	0.578375	0.790192	0.321009	0.407703	1.15986	1.67027	1.79343	2.13586	3.38329	0.812762	0.123364	0.603106	low
TCGA-CF-A8HX	0.945205	0	0.174982	1.29179	0.253096	2.12979	5.3565	0.660289	3.82744	7.33319	3.20772	0.21114	0.0954594	0.365787	low
TCGA-UY-A9PB	2.46301	0	0.212695	0.820789	0.150245	0	0.446467	0.4013	1.6404	1.4995	1.48334	1.79653	0.0625244	1.01459	high
TCGA-FD-A6TI	0.805479	1	1.31493	0.2482	0.775425	0.121657	0.17251	0.199361	1.3196	0.748381	1.49837	0.860155	0.0316874	0.88607	high
TCGA-K4-A54R	2.30685	0	0.286393	0.432464	0.108377	0.423951	1.99136	0.578944	1.51808	1.76668	1.66918	1.00291	0.0790003	0.860903	high
TCGA-CU-A5W6	0.153425	1	0.227758	0.401244	0.499894	0.449538	0.657367	0.32229	1.98274	1.77295	0.714776	1.03954	0.00934218	0.80822	high
TCGA-2F-A9KW	0.69589	1	0.264487	0.532515	0.206848	0.391524	0.746027	0.106932	1.37638	1.6704	1.34388	1.91485	0.023596	1.09579	high
TCGA-XF-AAME	7.74795	1	1.14331	0.475398	0.526709	0.294341	0.43042	0.683314	1.85791	2.21951	1.12916	0.876246	0.0628003	0.826676	high
TCGA-FD-A62P	0.523288	1	0.403293	0.541323	0.176355	0	1.164	0.434805	2.08571	0.908249	0.683055	0.634735	0.0226078	0.869646	high
TCGA-ZF-A9RF	5.33973	0	0.340277	1.31313	0.125907	0.615654	0.20833	0.871304	2.80429	0.899607	2.16969	0.883666	0.0765336	0.695336	low
TCGA-KQ-A41N	4.39452	0	0	0.525394	0.0867446	2.36318	1.72383	0.744724	13.8595	2.81366	1.21121	0.396209	0.0747998	0.559521	low
TCGA-E5-A4TZ	1.27945	1	0.865102	0.663538	0.278527	0.162619	0.194564	0.632902	3.13678	2.03299	0.911144	0.615947	0.0657314	0.819653	high
TCGA-BT-A0YX	1.09589	1	0.676438	0.141868	0.301486	0.0556301	0.443721	0.0911615	0.990179	0.794815	0.438054	0.310518	0.015954	0.942308	high
TCGA-DK-AA6X	1.27945	0	1.42234	1.68756	0.779176	0.70184	2.74572	1.56086	3.06607	2.98439	2.85438	1.53504	0.0945971	0.520846	low
TCGA-XF-A9T3	0.186301	0	0.40751	1.02559	0.260445	0	0.21385	0.549189	2.1338	1.35667	1.62399	1.11171	0.12815	0.81023	high
TCGA-PQ-A6FN	1.38904	0	0	0.426721	0.177681	0.450499	0.188221	0.158194	1.03954	0.651313	0.584739	0.52345	0.0184568	0.859995	high
TCGA-DK-A3WW	1.73425	0	0.879106	0.59867	0.16177	0	0.217097	0.418145	0.980391	1.33676	0.958277	0.203472	0.0216355	0.859394	high
TCGA-XF-AAMY	8.24932	0	1.22172	0.473036	0.6923	0.278234	1.23293	1.6718	6.66136	1.60115	1.85386	0.665596	0.0373915	0.61136	low
TCGA-GC-A3YS	2.07671	0	1.34715	1.24315	0.504126	0.276973	1.89992	0.499265	7.20161	2.27542	2.34876	0.636075	0.0672298	0.626262	low
TCGA-XF-A9SV	1.06301	1	1.01107	0.678557	0.294751	0.665199	0.766395	0.726712	2.31239	2.90401	0.940163	0.760288	0.02304	0.795498	high
TCGA-XF-A8HE	10.4575	0	1.78171	0.756689	0.601195	0.164843	0.569761	0.360173	1.28394	2.68231	2.19668	0.262893	0.0443061	0.726307	low
TCGA-DK-AA6Q	1.13151	1	1.66274	0.557957	0.188765	0.0683717	0.836205	0.560207	3.52225	1.46529	0.2899	0.2726	0.0332487	0.947714	high
TCGA-DK-AA75	0.931507	1	0.204221	0.411175	0.0515211	2.31772	2.35773	0.330267	5.7049	1.73971	1.46494	0.176781	0.061569	0.650413	low
TCGA-K4-A4AC	0.761644	1	0.252391	0.571682	0.0955104	0.249079	0	0.306126	2.43156	1.74229	1.28242	0.427026	0.00414104	0.819518	high
TCGA-GV-A40E	0.715068	1	0.148963	1.4996	0.355762	0.0980052	2.48846	0.923462	2.35536	1.98369	1.72156	1.00032	0.103262	0.579761	low
TCGA-BT-A2LD	1.70685	1	0.118479	0.238544	0.167384	0.175386	0.248698	0.670616	0.705948	1.1137	0.106235	0.913711	0.0984104	0.956625	high
TCGA-XF-A9T6	0.175342	0	0	0.640502	0.0577845	0	0.584296	0.308681	1.41794	0.411173	1.48329	1.69232	0.0234877	1.07712	high
TCGA-CU-A0YR	1.26027	1	0.321051	0.12928	0.181429	0.50694	0.825546	0.311523	2.06699	0.414958	0.537365	0.212224	0.00395066	0.861469	high
TCGA-4Z-AA84	1.26027	0	0.125087	0.346293	0.586964	0.493784	0.902585	0.252865	3.54755	1.3228	0.747741	0.521713	0.00538738	0.690669	low
TCGA-ZF-A9R0	1.86301	1	0.790471	0.578736	0.101523	1.27652	1.20674	1.33646	6.66735	5.31951	3.17879	0.260131	0.298297	0.556438	low
TCGA-FJ-A3ZE	0.887671	1	0.706865	0.830196	0.570652	1.44168	2.53478	0.419153	3.35486	3.65449	4.14095	2.18796	0.326282	0.720695	low
TCGA-GD-A3OP	0.175342	0	0.233314	0.685055	0.780887	0.422129	1.78554	1.16339	2.90074	2.39876	1.72012	0.691576	0.0379614	0.515069	low
TCGA-FD-A5BY	0.687671	0	0.715598	0.720388	0.433277	0.706207	0.0288867	0.178041	2.81984	0.71147	0.658102	1.28221	0.0268688	0.925328	high
TCGA-K4-A3WU	0.287671	0	0.354088	1.32682	0.710669	0.85419	4.18086	0.509007	4.35662	2.51944	1.88146	1.257	0.108607	0.522522	low
TCGA-E7-A519	1.39178	0	0.168808	1.9118	0.247005	4.74788	5.04939	0.136498	1.28015	2.13225	0.655908	0.15941	0.024927	0.385451	low
TCGA-XF-A9T0	2.18904	0	0.201883	0.474214	0.230889	0.265645	0.953485	0.707387	4.54084	1.50235	0.925217	0.40247	0.0902612	0.724317	low
TCGA-KQ-A41Q	0.989041	0	0.424216	0.274536	0.0978484	1.25595	3.68908	0.882056	2.45732	3.06193	5.43397	0.286142	0.197869	0.562794	low
TCGA-CF-A9FF	0.989041	0	0.78789	0.87248	0.246475	1.86612	1.4678	0.445963	2.21316	3.65679	2.5433	0.322412	0.0116344	0.596863	low
TCGA-XF-A9ST	0.350685	1	0.20384	0.239405	0.0891365	0.201164	0.427878	0.164825	3.39657	0.878209	1.99022	1.957	0.0443138	1.20978	high
TCGA-GC-A3RC	1.32603	0	0.213571	0.188125	0.0538799	0.26346	0.0560381	0.12952	0.611483	0.87831	0.574502	0.428572	0.0372311	0.97933	high
TCGA-DK-AA71	1.13699	0	0.0723494	0.473419	0.277436	0.999599	1.80343	0.0585019	1.9259	1.27516	0.648729	0.557959	0.0157284	0.761317	high
TCGA-DK-A6AV	5.34795	0	0.915629	0.422472	0.261796	1.35542	0.880912	0.616983	4.95383	1.97242	0.775398	0.612464	0.0259771	0.794146	high
TCGA-DK-A1A3	1.82192	1	0.247752	0.218234	0.406271	0.244501	0.130014	0.0500832	1.03047	0.545829	0.1481	1.05282	0.0121948	0.994713	high
